# Supplementary material for: A computational mechanistic study of pH-dependent alcohol dehydrogenation catalyzed by a novel [C,N] or [C,C] cyclometalated Cp*Ir complex in aqueous solution
Source: Royal Society of Chemistry journal article supplement (doi:10.1039/c4nj00441h), 2014-01-01
Supplement: c4nj00441h1.pdf [file c4nj00441h1.pdf]

*Supporting Information*

**Computational Mechanistic Study on pH-Dependent Alcohol Dehydrogenation  
Catalyzed by A Novel [C, N] or [C, C] Cyclometalated Cp\*Ir Complex in  
Aqueous Solution**

*Dan-Dan Zhang<sup>a</sup>, Xian-Kai Chen<sup>a</sup>, Hui-Ling Liu<sup>a\*</sup>, Xu-Ri Huang<sup>a\*</sup>*

<sup>a</sup>State Key Laboratory of Theoretical and Computational Chemistry, Institute of  
Theoretical Chemistry, Jilin University, Changchun, China, 130023

\*E-mail: [huling@jlu.edu.cn](mailto:huling@jlu.edu.cn) (H.-L. L.); [huangxr@jlu.edu.cn](mailto:huangxr@jlu.edu.cn) (X.-R. H.)

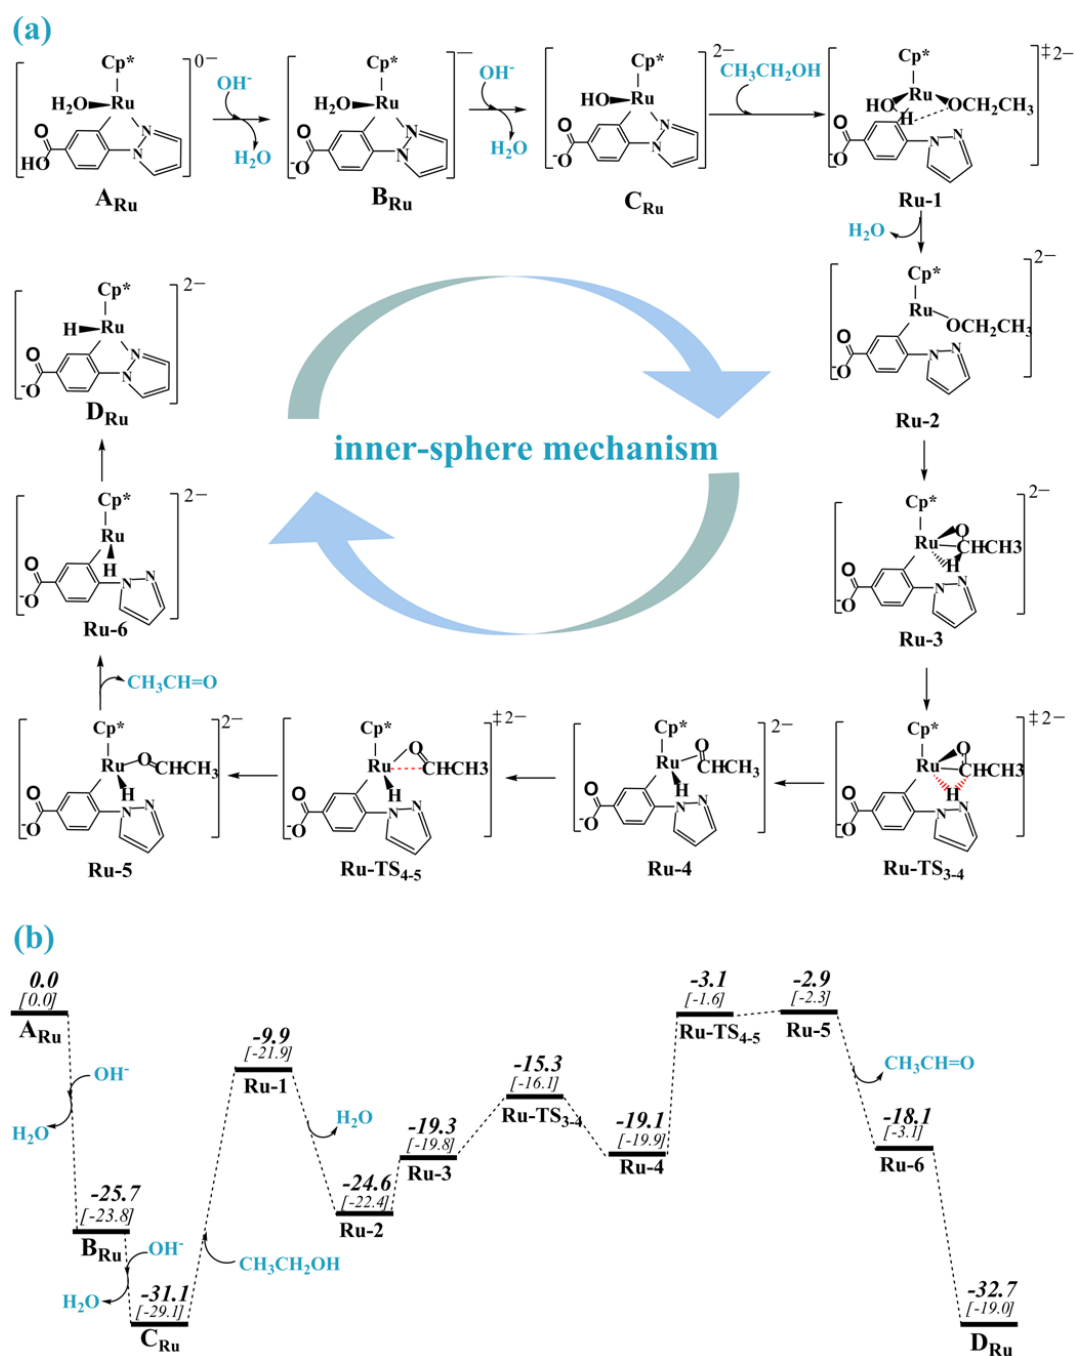

**Figure S1.** Detailed free energies profile of  $D_{Ru}$  formation through inner-sphere mechanism. The values (italic numbers) are given in kcal/mol and enthalpies are listed in square brackets.

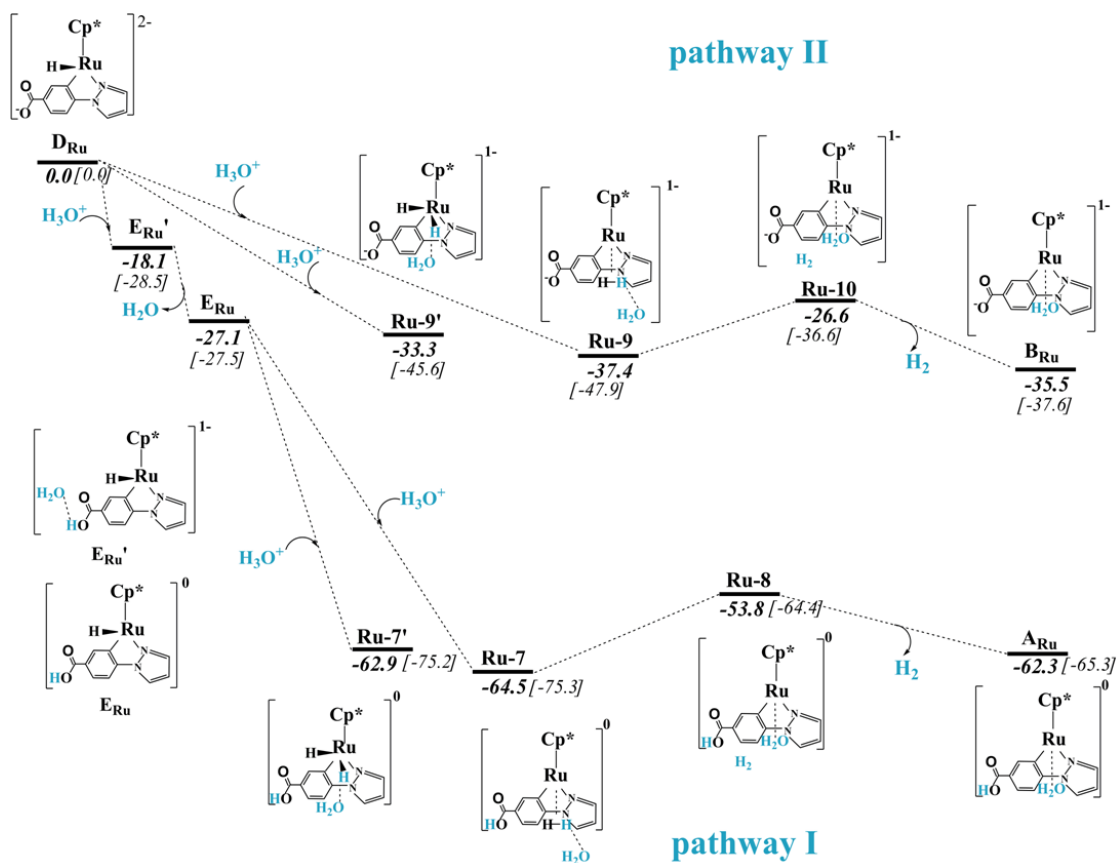

**Figure S2.** Detailed energy profiles of the H<sub>2</sub> formation based on the complex **D<sub>Ru</sub>** and the proton, including the free energies and enthalpies (in brackets) in M06/BSII (SMD, water) level (in kcal/mol).

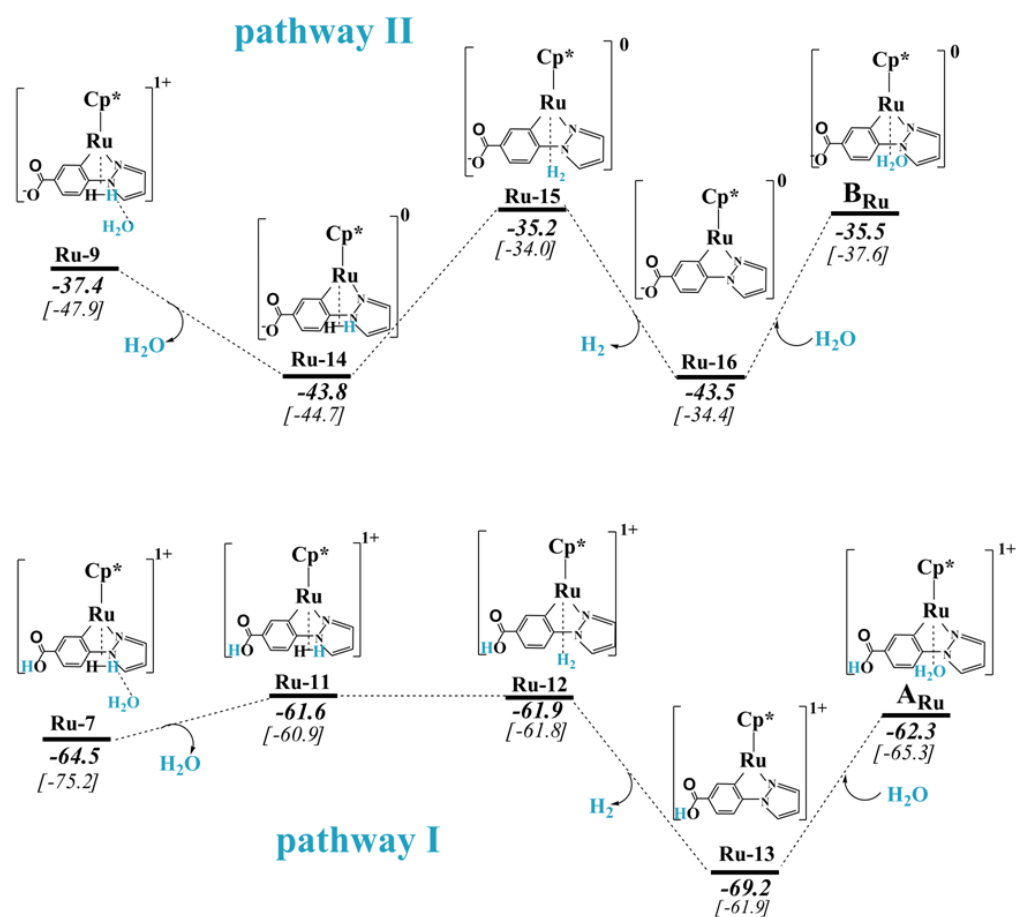

**Figure S3.** Detailed free energy profiles for another pathways beginning with intermediate **Ru-7** (pathway I) and **Ru-9** (pathway II), where waters are firstly dissociated. The values (italic numbers) are given in kcal/mol and enthalpies are listed in square brackets.

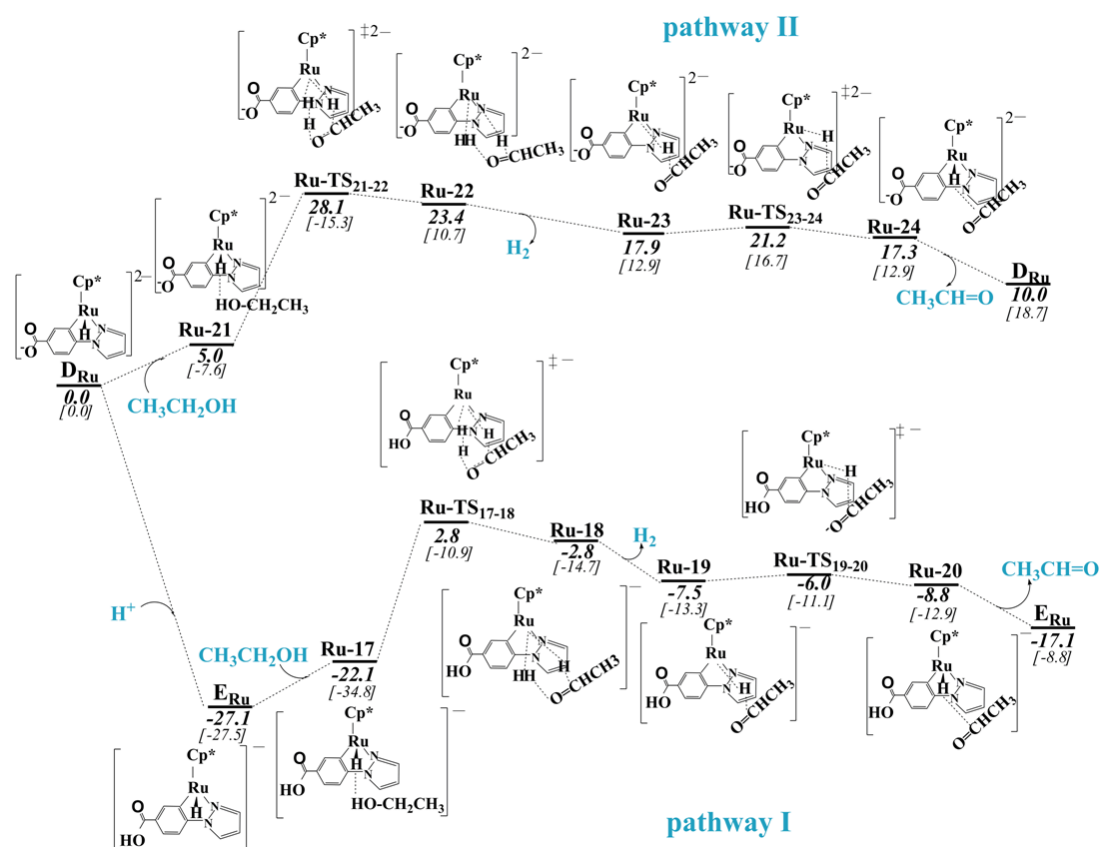

**Figure S4.** Detailed energy profiles of the H<sub>2</sub> formation based on the complex **D<sub>Ru</sub>** and the ethanol, including the free energies and enthalpies (in brackets) in M06/BSII (SMD, water) level (in kcal/mol).

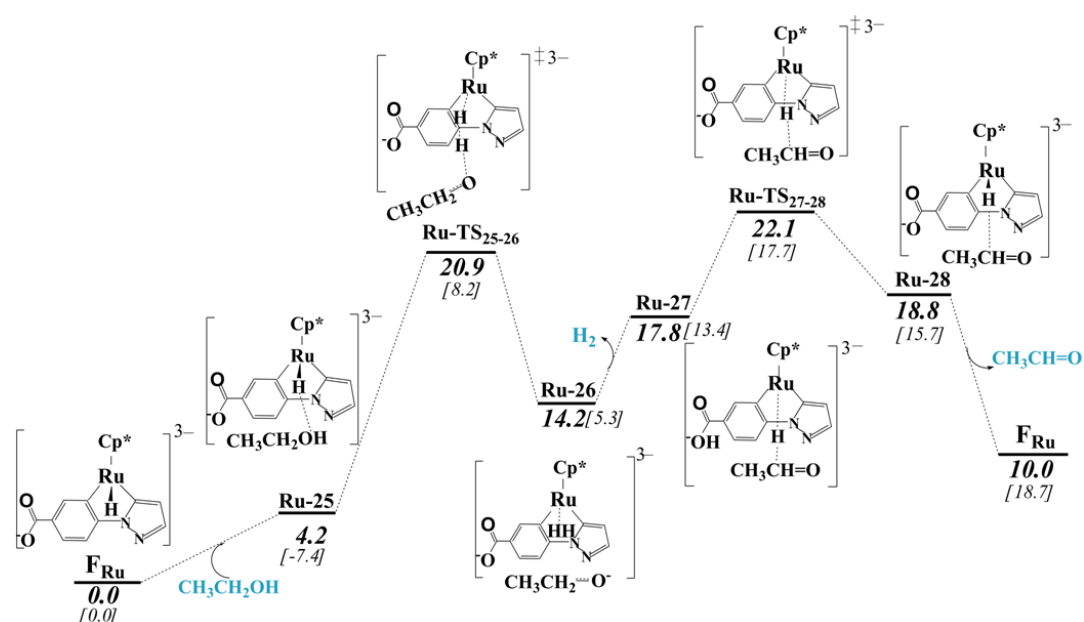

**Figure S5.** Detailed energy profile of the  $\text{H}_2$  formation based on the complex  $\text{F}_{\text{Ru}}$  in the lowest triplet state and the ethanol molecule, including the free energies and enthalpies (in brackets) in M06/BSII (SMD, water) level, (in kcal/mol).

**Cartesian coordinates, atom numbers, imaginary vibrational modes, and Gibbs free energies [in Hartree and at the M06/BSII (SMD, water) level of theory] for all the complexes calculated in this study**

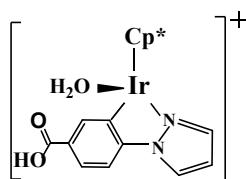

$\text{A}_{\text{Ir}}$

**50**

**E=-1215.589466 (au)**

|    |             |             |             |
|----|-------------|-------------|-------------|
| C  | -1.20892400 | -1.95823000 | 2.58976400  |
| C  | -1.69108400 | -1.23099200 | 1.41304100  |
| C  | -2.76004200 | -0.41031700 | 1.81724000  |
| C  | -2.10767800 | -1.65968100 | 3.68982000  |
| C  | -2.99901400 | -0.63571400 | 3.24599100  |
| Ir | -0.94047300 | 0.08554900  | 3.09950400  |
| C  | -1.10559300 | -1.34789700 | 0.04977100  |
| H  | -1.54342200 | -2.20252400 | -0.48096600 |
| H  | -1.29375000 | -0.45439900 | -0.55443700 |
| H  | -0.02394500 | -1.51670600 | 0.08991200  |
| C  | -0.15011700 | -3.00443200 | 2.58491800  |
| H  | 0.24542700  | -3.17115900 | 3.59160400  |
| H  | -0.54468900 | -3.95941600 | 2.21456800  |
| H  | 0.69011000  | -2.71816000 | 1.94329800  |
| C  | -2.09611400 | -2.33658300 | 5.01333900  |
| H  | -2.62972400 | -1.76568000 | 5.77845800  |
| H  | -2.59154600 | -3.31189200 | 4.92722100  |
| H  | -1.07674600 | -2.51150200 | 5.37128000  |
| C  | -4.09909600 | -0.00223200 | 4.02431100  |
| H  | -4.23741800 | 1.04597200  | 3.73897800  |
| H  | -5.04921800 | -0.51929600 | 3.83818600  |
| H  | -3.90987800 | -0.03421400 | 5.10154700  |
| C  | -3.53388000 | 0.55290000  | 0.98902300  |
| H  | -3.07511200 | 0.71129300  | 0.00890000  |

|   |             |            |            |
|---|-------------|------------|------------|
| H | -4.55284800 | 0.18037300 | 0.82411000 |
| H | -3.62000300 | 1.52638900 | 1.48509500 |
| C | 3.07405800  | 1.25585000 | 2.77687100 |
| C | 2.89015000  | 1.26142900 | 1.40886800 |
| C | 1.55032200  | 0.90591400 | 1.21853700 |
| N | 0.95661300  | 0.69815900 | 2.39622000 |
| H | 3.95053400  | 1.46926600 | 3.37317800 |
| H | 3.62714400  | 1.48738700 | 0.65242300 |
| H | 0.98694800  | 0.78808900 | 0.30101800 |
| N | 1.89649800  | 0.91584600 | 3.34785600 |
| C | 0.12664300  | 0.38084800 | 4.84215900 |
| C | 1.46821300  | 0.77968800 | 4.69167100 |
| C | -0.34126100 | 0.31123200 | 6.15110900 |
| C | 2.31397800  | 1.05910900 | 5.75655900 |
| C | 0.48290400  | 0.57487400 | 7.25088400 |
| H | -1.37670600 | 0.05174100 | 6.36799200 |
| C | 1.81203000  | 0.94634300 | 7.04773400 |
| H | 3.34158600  | 1.37728700 | 5.59678500 |
| H | 2.45964700  | 1.20518700 | 7.88348000 |
| C | -0.15441600 | 0.49146900 | 8.60279200 |
| O | -1.34595900 | 0.56855100 | 8.75460400 |
| O | 0.66544700  | 0.32808500 | 9.65407400 |
| H | 1.56443700  | 0.11671100 | 9.37482400 |
| O | -1.35328200 | 2.36364400 | 3.30947800 |
| H | -0.67687900 | 2.91226500 | 2.88959300 |
| H | -1.32931500 | 2.57905200 | 4.25310300 |

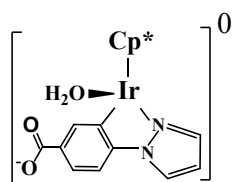

**B<sub>Ir</sub>**

**49**

**E=-1215.133641(au)**

|    |             |             |             |
|----|-------------|-------------|-------------|
| C  | -1.19106300 | -1.93549000 | 2.45549500  |
| C  | -1.79114100 | -1.18218500 | 1.34944200  |
| C  | -2.81649200 | -0.38684600 | 1.88552800  |
| C  | -1.98160900 | -1.69014300 | 3.64671200  |
| C  | -2.91358400 | -0.65294800 | 3.32511300  |
| Ir | -0.88765300 | 0.08576200  | 3.03459000  |
| C  | -1.33964100 | -1.25152300 | -0.06814100 |
| H  | -1.81459900 | -2.09235600 | -0.59014500 |
| H  | -1.58471000 | -0.33751500 | -0.61945800 |
| H  | -0.25637700 | -1.40383900 | -0.13502800 |

|   |             |             |            |
|---|-------------|-------------|------------|
| C | -0.11618600 | -2.95741900 | 2.31433600 |
| H | 0.39830500  | -3.11937000 | 3.26659600 |
| H | -0.52655300 | -3.91973700 | 1.98098700 |
| H | 0.63643600  | -2.64217200 | 1.58312300 |
| C | -1.83858800 | -2.39824900 | 4.94721400 |
| H | -2.17263200 | -1.79366100 | 5.79593900 |
| H | -2.43799500 | -3.31758000 | 4.93007700 |
| H | -0.79816400 | -2.67523000 | 5.14307000 |
| C | -3.93236200 | -0.05182300 | 4.23194200 |
| H | -4.08615300 | 1.00972100  | 4.00503600 |
| H | -4.90207100 | -0.55544600 | 4.12415300 |
| H | -3.63339500 | -0.12457400 | 5.28271600 |
| C | -3.66170200 | 0.61381500  | 1.17969200 |
| H | -3.32134800 | 0.78929000  | 0.15495900 |
| H | -4.70475600 | 0.27462500  | 1.13554700 |
| H | -3.65463700 | 1.57467500  | 1.70765500 |
| C | 3.18509000  | 1.03387000  | 2.85378400 |
| C | 3.06275000  | 1.01995100  | 1.47320600 |
| C | 1.71383000  | 0.75685400  | 1.23155100 |
| N | 1.05621100  | 0.62165600  | 2.39078100 |
| H | 4.04171900  | 1.19772200  | 3.49302200 |
| H | 3.84627100  | 1.17749000  | 0.74676000 |
| H | 1.17814800  | 0.66163600  | 0.29508800 |
| N | 1.96801700  | 0.79407700  | 3.37701600 |
| C | 0.11237500  | 0.38256300  | 4.79317800 |
| C | 1.47108600  | 0.72187700  | 4.70814100 |
| C | -0.45867200 | 0.39026500  | 6.05929900 |
| C | 2.25021900  | 1.01121800  | 5.82536000 |
| C | 0.28950500  | 0.66371600  | 7.20392100 |
| H | -1.51216000 | 0.17745600  | 6.24674600 |
| C | 1.64514500  | 0.96603700  | 7.07765200 |
| H | 3.30348900  | 1.27274400  | 5.72219400 |
| H | 2.19201900  | 1.17345100  | 7.99538500 |
| C | -0.41739200 | 0.60332800  | 8.58647300 |
| O | -1.62253400 | 0.28278700  | 8.51819500 |
| O | 0.32208300  | 0.87804200  | 9.54594500 |
| O | -1.21079800 | 2.36996400  | 3.33040200 |
| H | -0.41879200 | 2.83111400  | 3.02102400 |
| H | -1.16856500 | 2.41862700  | 4.30122100 |



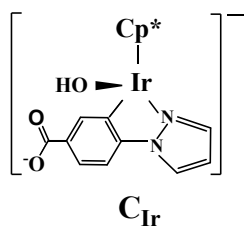

**48**

**E=-1214.659638(au)**

|    |             |             |             |
|----|-------------|-------------|-------------|
| C  | -1.22585700 | -2.01850800 | 2.38238600  |
| C  | -1.82073500 | -1.17904600 | 1.34560000  |
| C  | -2.79255700 | -0.35899300 | 1.95909000  |
| C  | -1.89986100 | -1.74779400 | 3.61808700  |
| C  | -2.82816900 | -0.65971200 | 3.38189000  |
| Ir | -0.82209900 | 0.05573300  | 3.01039700  |
| C  | -1.44116300 | -1.20247900 | -0.09663000 |
| H  | -2.00766800 | -1.96072800 | -0.65679200 |
| H  | -1.61542200 | -0.23225900 | -0.57546300 |
| H  | -0.37792500 | -1.44209700 | -0.22122900 |
| C  | -0.19202400 | -3.06561300 | 2.13821100  |
| H  | 0.31176100  | -3.34538900 | 3.06916900  |
| H  | -0.62556800 | -3.97653100 | 1.69994400  |
| H  | 0.58226000  | -2.70248700 | 1.45049400  |
| C  | -1.72086800 | -2.47567500 | 4.90588400  |
| H  | -1.80051800 | -1.80978500 | 5.77251100  |
| H  | -2.48124600 | -3.26128600 | 5.01296000  |
| H  | -0.73436000 | -2.94829200 | 4.96169600  |
| C  | -3.79586300 | -0.07530800 | 4.35487900  |
| H  | -3.87072900 | 1.01025700  | 4.22004500  |
| H  | -4.80169400 | -0.50385900 | 4.23507600  |
| H  | -3.47991500 | -0.25069200 | 5.38889800  |
| C  | -3.55192400 | 0.76140900  | 1.33793600  |
| H  | -3.49658000 | 0.73454500  | 0.24455900  |
| H  | -4.60974500 | 0.72975700  | 1.62724700  |
| H  | -3.12191100 | 1.71409300  | 1.68660400  |
| C  | 3.20067700  | 1.16828600  | 2.94950100  |
| C  | 3.14909600  | 1.02613500  | 1.57358000  |
| C  | 1.84638700  | 0.59088300  | 1.30410400  |
| N  | 1.16214200  | 0.46392800  | 2.44152300  |
| H  | 3.99392300  | 1.49366100  | 3.60795900  |
| H  | 3.94320400  | 1.21859500  | 0.86631000  |
| H  | 1.36021500  | 0.37651400  | 0.36042500  |
| N  | 1.99086700  | 0.82475100  | 3.44015800  |
| C  | 0.07771200  | 0.48128600  | 4.79594200  |
| C  | 1.44012600  | 0.80954200  | 4.74932900  |

|   |             |            |            |
|---|-------------|------------|------------|
| C | -0.50721300 | 0.48445100 | 6.06128200 |
| C | 2.20150400  | 1.09109100 | 5.88243400 |
| C | 0.22076700  | 0.73115300 | 7.22454700 |
| H | -1.56796200 | 0.28482100 | 6.21056600 |
| C | 1.57892900  | 1.04134600 | 7.12283300 |
| H | 3.26132800  | 1.33638300 | 5.79699200 |
| H | 2.11171700  | 1.23802800 | 8.05112800 |
| C | -0.47156000 | 0.62070100 | 8.60565900 |
| O | -1.65852900 | 0.22912300 | 8.56278600 |
| O | 0.25082900  | 0.92205200 | 9.57819000 |
| O | -1.06945000 | 2.09954200 | 2.80091200 |
| H | -0.92847500 | 2.48794700 | 3.67226000 |

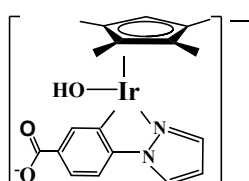

1

48

E=-1214.632623(au)

|    |             |             |             |
|----|-------------|-------------|-------------|
| C  | -0.68461000 | -1.98040400 | -1.16832900 |
| C  | -1.09115000 | -1.94570400 | -2.46112900 |
| C  | -2.02298100 | -0.82898500 | -2.63356700 |
| C  | -1.31513100 | -0.84840500 | -0.42898100 |
| C  | -2.20166900 | -0.18997300 | -1.44001400 |
| Ir | 0.01018200  | 0.75765200  | -0.21001900 |
| C  | -0.64450900 | -2.82395400 | -3.58093700 |
| H  | -1.48639200 | -3.34690400 | -4.05751600 |
| H  | -0.14355700 | -2.25072700 | -4.37676600 |
| H  | 0.06369000  | -3.58505400 | -3.23478100 |
| C  | 0.27824100  | -2.92950300 | -0.53944900 |
| H  | 0.71887400  | -2.50925600 | 0.37233900  |
| H  | -0.20889900 | -3.87370000 | -0.25576300 |
| H  | 1.10595700  | -3.17967500 | -1.21764500 |
| C  | -1.93129800 | -1.20722200 | 0.91004100  |
| H  | -2.40760700 | -0.34203200 | 1.38131900  |
| H  | -2.69493000 | -1.99073600 | 0.77252200  |
| H  | -1.17563400 | -1.58866900 | 1.60631400  |
| C  | -3.23000600 | 0.84375800  | -1.10571900 |
| H  | -2.84263300 | 1.61084900  | -0.42455100 |
| H  | -3.61281800 | 1.33918300  | -2.00585700 |
| H  | -4.09146600 | 0.37990900  | -0.59931300 |
| C  | -2.66938900 | -0.52690500 | -3.94174700 |
| H  | -1.92001400 | -0.34789000 | -4.72763100 |

|   |             |             |             |
|---|-------------|-------------|-------------|
| H | -3.28237800 | -1.37049100 | -4.29126900 |
| H | -3.31430300 | 0.35629400  | -3.89071800 |
| C | 3.42588300  | -0.91879100 | -1.85408100 |
| C | 2.83932300  | -0.74824000 | -3.09488200 |
| C | 1.57210100  | -0.21021000 | -2.83187800 |
| N | 1.39672300  | -0.06987800 | -1.51521900 |
| H | 4.39766000  | -1.29102000 | -1.56151100 |
| H | 3.27235200  | -0.97799100 | -4.05795300 |
| H | 0.77065100  | 0.06554600  | -3.50615300 |
| N | 2.53426400  | -0.50151500 | -0.92612600 |
| C | 1.41512700  | 0.16076300  | 1.06000300  |
| C | 2.56452400  | -0.41527400 | 0.48411600  |
| C | 1.35934100  | 0.20908500  | 2.45417200  |
| C | 3.62032400  | -0.90910300 | 1.24509600  |
| C | 2.40489800  | -0.27334000 | 3.24122100  |
| H | 0.50637000  | 0.60823000  | 3.00400300  |
| C | 3.53173300  | -0.82580400 | 2.62766800  |
| H | 4.48885200  | -1.35877000 | 0.76183000  |
| H | 4.31480300  | -1.19105200 | 3.28893700  |
| C | 2.30680000  | -0.21021900 | 4.78967000  |
| O | 1.24381000  | 0.27739700  | 5.22400000  |
| O | 3.30717800  | -0.65992100 | 5.38514600  |
| O | -1.03048500 | 1.98649600  | 0.93064100  |
| H | -0.87289200 | 1.84319800  | 1.87106900  |

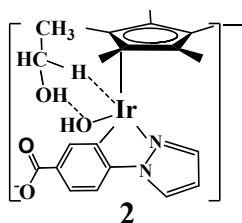

57

**E=-1369.614435(au)**

|    |             |             |             |
|----|-------------|-------------|-------------|
| C  | -0.65149000 | -2.23130800 | -1.24528300 |
| C  | -0.98075500 | -2.08909200 | -2.56546700 |
| C  | -2.04043800 | -1.10396100 | -2.66855400 |
| C  | -1.46295900 | -1.30407500 | -0.43597300 |
| C  | -2.38762800 | -0.67291000 | -1.40428200 |
| Ir | -0.35790100 | 0.57255600  | -0.28774100 |
| C  | -0.36286300 | -2.76406500 | -3.74645100 |
| H  | -1.06260800 | -3.45236600 | -4.24409500 |
| H  | -0.03670900 | -2.04773700 | -4.51635800 |
| H  | 0.51818600  | -3.35044800 | -3.46016300 |
| C  | 0.38629100  | -3.12281700 | -0.65457900 |

|   |             |             |             |
|---|-------------|-------------|-------------|
| H | 0.94560600  | -2.61362200 | 0.14246300  |
| H | -0.05962600 | -4.01878600 | -0.19662400 |
| H | 1.10946200  | -3.46641400 | -1.40580100 |
| C | -1.97445100 | -1.81537000 | 0.89428300  |
| H | -2.60450000 | -1.07744300 | 1.40737700  |
| H | -2.58028800 | -2.72773700 | 0.76863400  |
| H | -1.14840700 | -2.05210900 | 1.57563400  |
| C | -3.58662700 | 0.15520600  | -1.04095900 |
| H | -3.35724100 | 1.18088600  | -0.71740700 |
| H | -4.27280700 | 0.24320200  | -1.89166500 |
| H | -4.14982800 | -0.31844800 | -0.22305100 |
| C | -2.63502500 | -0.68192900 | -3.96994300 |
| H | -1.88619500 | -0.22877500 | -4.63751400 |
| H | -3.05198300 | -1.53869900 | -4.51961200 |
| H | -3.43503600 | 0.05480000  | -3.83838500 |
| C | 3.24418000  | -0.52669900 | -1.82470300 |
| C | 2.67579000  | -0.34934700 | -3.07374800 |
| C | 1.35254700  | 0.03781500  | -2.82964500 |
| N | 1.13811700  | 0.07825500  | -1.51532100 |
| H | 4.24137300  | -0.81380100 | -1.52209900 |
| H | 3.15618100  | -0.47585600 | -4.03301100 |
| H | 0.54617900  | 0.27775500  | -3.50951700 |
| N | 2.29571700  | -0.25572600 | -0.90237800 |
| C | 1.02262100  | 0.10609100  | 1.06072800  |
| C | 2.26126200  | -0.27281400 | 0.51178300  |
| C | 0.89692700  | 0.06717400  | 2.44665400  |
| C | 3.33743900  | -0.68233900 | 1.29536400  |
| C | 1.95898500  | -0.33836700 | 3.25602000  |
| H | -0.02337100 | 0.32295600  | 2.97451000  |
| C | 3.17480700  | -0.70603800 | 2.67316100  |
| H | 4.27845700  | -0.98140900 | 0.83158600  |
| H | 3.96753500  | -1.01284800 | 3.35209600  |
| C | 1.77732900  | -0.38861300 | 4.79819100  |
| O | 0.64272000  | -0.05810300 | 5.19872700  |
| O | 2.79418000  | -0.75497300 | 5.42078500  |
| O | 0.27825400  | 2.58709600  | -0.39324900 |
| H | 1.04813500  | 2.70592800  | 0.17510800  |
| C | -3.00240600 | 1.69974500  | 2.38597500  |
| H | -2.78920100 | 0.85836900  | 3.05422700  |
| H | -3.20826100 | 2.58526600  | 2.99663300  |
| H | -3.89551700 | 1.47770000  | 1.79114100  |
| C | -1.81768500 | 1.99113200  | 1.49694800  |
| H | -1.69504800 | 0.96041200  | 0.94259100  |
| H | -0.90268400 | 2.12257800  | 2.09167300  |

|   |             |            |            |
|---|-------------|------------|------------|
| O | -2.06573800 | 3.03223600 | 0.64154900 |
| H | -1.19141000 | 3.16436900 | 0.17397800 |

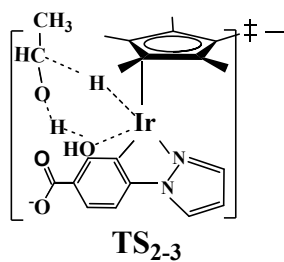

**57 -529.73i cm<sup>-1</sup>**

**E=-1369.604408(au)**

|    |             |             |             |
|----|-------------|-------------|-------------|
| C  | -1.01881900 | -1.50933700 | 2.78417900  |
| C  | -1.34836800 | -1.41980900 | 1.46504300  |
| C  | -2.42041500 | -0.44285400 | 1.32182200  |
| C  | -1.84229500 | -0.55281600 | 3.56415200  |
| C  | -2.77100200 | 0.03652700  | 2.56030800  |
| Ir | -0.78448500 | 1.29002600  | 3.71578200  |
| C  | -0.72425700 | -2.12927800 | 0.30858300  |
| H  | -1.41906100 | -2.83448100 | -0.17181000 |
| H  | -0.39688000 | -1.43326800 | -0.47927200 |
| H  | 0.15815100  | -2.70169800 | 0.61680000  |
| C  | 0.01769400  | -2.37475500 | 3.41240900  |
| H  | 0.56851000  | -1.83634100 | 4.19556600  |
| H  | -0.43108700 | -3.25470900 | 3.89731200  |
| H  | 0.74673400  | -2.74307100 | 2.67889700  |
| C  | -2.39974600 | -1.06999500 | 4.87502100  |
| H  | -3.05343800 | -0.33373000 | 5.35794400  |
| H  | -2.98763700 | -1.98978100 | 4.72154200  |
| H  | -1.59711500 | -1.29706800 | 5.58664900  |
| C  | -3.94746900 | 0.90877000  | 2.88751000  |
| H  | -3.68107300 | 1.93447200  | 3.18181200  |
| H  | -4.62873500 | 0.98831100  | 2.03180000  |
| H  | -4.52420200 | 0.48379900  | 3.72194800  |
| C  | -3.01490000 | -0.08805300 | 0.00084600  |
| H  | -2.26738500 | 0.34555000  | -0.68107600 |
| H  | -3.41272100 | -0.97606500 | -0.51164700 |
| H  | -3.82850700 | 0.63923800  | 0.09483200  |
| C  | 2.88339500  | 0.20004700  | 2.17500600  |
| C  | 2.33650400  | 0.33395000  | 0.91001900  |
| C  | 1.00895000  | 0.72120900  | 1.12515500  |
| N  | 0.77053300  | 0.81347100  | 2.43444800  |
| H  | 3.87595400  | -0.07781000 | 2.50065500  |
| H  | 2.83372800  | 0.17556600  | -0.03609500 |
| H  | 0.20630700  | 0.91538500  | 0.42443900  |

|   |             |             |            |
|---|-------------|-------------|------------|
| N | 1.91845900  | 0.49873400  | 3.07096900 |
| C | 0.61852200  | 0.81648400  | 5.03983400 |
| C | 1.86617000  | 0.47624000  | 4.48784600 |
| C | 0.48543400  | 0.73626800  | 6.42307800 |
| C | 2.94749300  | 0.07696800  | 5.27083900 |
| C | 1.54990800  | 0.33321600  | 7.23020800 |
| H | -0.44734800 | 0.95684300  | 6.94482800 |
| C | 2.77866600  | 0.01415400  | 6.64605900 |
| H | 3.89974500  | -0.18668100 | 4.80841100 |
| H | 3.57493000  | -0.29115800 | 7.32142500 |
| C | 1.35964200  | 0.22239800  | 8.76788200 |
| O | 0.21319600  | 0.50224000  | 9.17302400 |
| O | 2.38290600  | -0.13693500 | 9.38520000 |
| O | -0.10168000 | 3.42900700  | 3.69640300 |
| H | -0.00804800 | 3.69421700  | 2.77685500 |
| C | -3.35818600 | 2.53417100  | 6.30070100 |
| H | -3.18916100 | 1.62797400  | 6.89283600 |
| H | -3.58533600 | 3.35809700  | 6.98781100 |
| H | -4.21980700 | 2.39568900  | 5.63848700 |
| C | -2.12710100 | 2.91551300  | 5.51368400 |
| H | -1.97471700 | 1.70985800  | 4.90013000 |
| H | -1.20502900 | 2.87773600  | 6.12476400 |
| O | -2.23367900 | 3.89801400  | 4.67227400 |
| H | -1.07740800 | 3.83934300  | 4.10315000 |

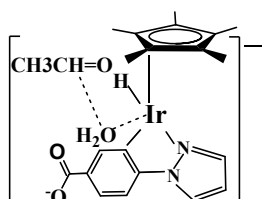

3

57

**E=-1369.61443(au)**

|    |             |             |             |
|----|-------------|-------------|-------------|
| C  | -0.57604500 | -2.51183000 | -1.74621700 |
| C  | -0.80494600 | -2.22855200 | -3.06432200 |
| C  | -1.97839400 | -1.37700200 | -3.14687700 |
| C  | -1.58871200 | -1.82809300 | -0.91501100 |
| C  | -2.51878800 | -1.21430900 | -1.88422400 |
| Ir | -0.85382400 | 0.15090900  | -0.63001100 |
| C  | -0.00193400 | -2.64373600 | -4.25245000 |
| H  | -0.56314400 | -3.32521700 | -4.91004600 |
| H  | 0.29578600  | -1.79081500 | -4.88138600 |
| H  | 0.91925600  | -3.16054600 | -3.95865600 |
| C  | 0.54022700  | -3.30422500 | -1.16072200 |
| H  | 1.00900200  | -2.76746800 | -0.32430700 |

|   |             |             |             |
|---|-------------|-------------|-------------|
| H | 0.18648500  | -4.26422100 | -0.75510700 |
| H | 1.32326100  | -3.52546500 | -1.89720700 |
| C | -2.07726400 | -2.53081400 | 0.32929000  |
| H | -2.83621700 | -1.94082900 | 0.85294300  |
| H | -2.50802700 | -3.51869100 | 0.09493800  |
| H | -1.25500500 | -2.68118300 | 1.03922700  |
| C | -3.90332400 | -0.72971900 | -1.58062600 |
| H | -4.00727400 | -0.44993000 | -0.52865400 |
| H | -4.17660300 | 0.15260000  | -2.17455200 |
| H | -4.65149300 | -1.50956700 | -1.79527200 |
| C | -2.51772300 | -0.84656300 | -4.43219800 |
| H | -1.75616600 | -0.28427600 | -4.99271900 |
| H | -2.85150900 | -1.65830000 | -5.09638500 |
| H | -3.37068100 | -0.17790200 | -4.27207600 |
| C | 3.28540300  | -0.34786100 | -1.46217000 |
| C | 3.03222000  | -0.24354100 | -2.81690100 |
| C | 1.64792700  | -0.03714800 | -2.90426600 |
| N | 1.09757900  | -0.02311100 | -1.69373300 |
| H | 4.20726600  | -0.50289000 | -0.91932200 |
| H | 3.75063400  | -0.30540500 | -3.62208500 |
| H | 1.01384700  | 0.09086200  | -3.77294100 |
| N | 2.10465700  | -0.20600400 | -0.81659500 |
| C | 0.41911500  | -0.01447800 | 0.89381200  |
| C | 1.78087000  | -0.19063800 | 0.57002100  |
| C | 0.11468800  | 0.09623600  | 2.25318800  |
| C | 2.77318200  | -0.31619800 | 1.54077800  |
| C | 1.09477700  | 0.02451200  | 3.24517200  |
| H | -0.90912500 | 0.28228600  | 2.57137400  |
| C | 2.42040200  | -0.21727700 | 2.87967000  |
| H | 3.81527000  | -0.46278400 | 1.25448900  |
| H | 3.15514200  | -0.29558700 | 3.67798200  |
| C | 0.74327100  | 0.31952500  | 4.71366500  |
| O | -0.35998400 | 0.91229000  | 4.86878900  |
| O | 1.59189700  | -0.00802900 | 5.56016900  |
| O | -0.38444200 | 2.40203100  | -0.38495600 |
| H | -1.19759300 | 2.79858200  | -0.71492500 |
| C | -0.89688800 | 3.74528400  | 4.49738700  |
| H | -0.94183400 | 2.92182700  | 5.22329000  |
| H | -0.16935100 | 4.47686600  | 4.87178100  |
| H | -1.87082900 | 4.21875400  | 4.34536100  |
| C | -0.39772000 | 3.14353700  | 3.23277500  |
| H | -2.09653900 | 0.34292600  | 0.34627500  |
| H | 0.59172500  | 2.65144800  | 3.29554800  |
| O | -1.00088300 | 3.19489400  | 2.17102200  |

|   |             |            |            |
|---|-------------|------------|------------|
| H | -0.44443700 | 2.55245700 | 0.59070000 |
|---|-------------|------------|------------|

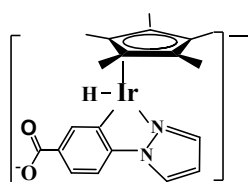

4

47

**E=-1139.387732(au)**

|    |             |             |             |
|----|-------------|-------------|-------------|
| C  | -0.63986900 | -2.47869500 | -1.66071000 |
| C  | -0.82436800 | -2.28051400 | -2.99359100 |
| C  | -2.00067500 | -1.42915400 | -3.17744300 |
| C  | -1.69085100 | -1.73733300 | -0.90960100 |
| C  | -2.57246300 | -1.16030000 | -1.95918800 |
| Ir | -0.82442400 | 0.13179200  | -0.58362100 |
| C  | 0.02428200  | -2.76202300 | -4.12160200 |
| H  | -0.51843400 | -3.45887400 | -4.77749600 |
| H  | 0.36998500  | -1.93832600 | -4.76483100 |
| H  | 0.91752200  | -3.28262600 | -3.75789800 |
| C  | 0.45152600  | -3.22986700 | -0.98150900 |
| H  | 0.83627700  | -2.66505700 | -0.12226100 |
| H  | 0.09964100  | -4.19756600 | -0.59421500 |
| H  | 1.29379600  | -3.42898600 | -1.65636900 |
| C  | -2.29178500 | -2.42128200 | 0.29480800  |
| H  | -3.07714700 | -1.81357100 | 0.75406700  |
| H  | -2.72486200 | -3.39429000 | 0.00906800  |
| H  | -1.53393200 | -2.60148600 | 1.06570500  |
| C  | -3.92820900 | -0.57999700 | -1.70989600 |
| H  | -3.94926900 | 0.02481900  | -0.79838300 |
| H  | -4.25745100 | 0.05911100  | -2.53813300 |
| H  | -4.68085500 | -1.37582600 | -1.59295400 |
| C  | -2.47716800 | -1.00092600 | -4.52226800 |
| H  | -1.69150400 | -0.46211300 | -5.07172600 |
| H  | -2.75034100 | -1.86540300 | -5.14486700 |
| H  | -3.34978400 | -0.34283400 | -4.46112000 |
| C  | 3.30983000  | -0.19024300 | -1.51953700 |
| C  | 3.02217300  | -0.14737600 | -2.87234200 |
| C  | 1.63253200  | 0.01359500  | -2.93305800 |
| N  | 1.11033500  | 0.05951700  | -1.70807500 |
| H  | 4.24773400  | -0.30323900 | -0.99407800 |
| H  | 3.72321000  | -0.21873300 | -3.69171100 |
| H  | 0.97576800  | 0.08845400  | -3.79141400 |
| N  | 2.14340000  | -0.05678100 | -0.85097400 |
| C  | 0.48227300  | 0.01966700  | 0.90398900  |



|   |             |             |            |
|---|-------------|-------------|------------|
| C | 1.84789800  | -0.04198300 | 0.54383000 |
| C | 0.19572800  | -0.00129200 | 2.27559700 |
| C | 2.86958100  | -0.09646900 | 1.48811900 |
| C | 1.20025400  | -0.07116100 | 3.24160700 |
| H | -0.83026200 | 0.02524000  | 2.63958700 |
| C | 2.53496700  | -0.11277700 | 2.83509900 |
| H | 3.91459800  | -0.12236900 | 1.17632500 |
| H | 3.28315100  | -0.16220900 | 3.62383900 |
| C | 0.84996200  | -0.11349000 | 4.75305900 |
| O | -0.37006600 | -0.08745100 | 5.00967600 |
| O | 1.84392300  | -0.17245000 | 5.50785900 |
| H | -2.03718200 | 0.31482200  | 0.42338500 |

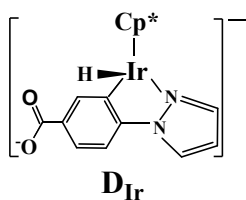

47

**E=-1139.427421(au)**

|    |             |             |             |
|----|-------------|-------------|-------------|
| C  | -1.26931900 | -2.04866600 | 2.34656700  |
| C  | -1.82329800 | -1.13226200 | 1.36206300  |
| C  | -2.78140800 | -0.31612100 | 2.01925200  |
| C  | -1.89012400 | -1.79551700 | 3.59400100  |
| C  | -2.79343300 | -0.67177900 | 3.42370100  |
| Ir | -0.81195900 | 0.14736300  | 2.99094600  |
| C  | -1.51031400 | -1.15215700 | -0.09674300 |
| H  | -2.12781000 | -1.88363300 | -0.64018300 |
| H  | -1.67744800 | -0.17111100 | -0.55721400 |
| H  | -0.46273600 | -1.42527400 | -0.27571500 |
| C  | -0.23067900 | -3.07577600 | 2.04399700  |
| H  | 0.18797500  | -3.50046100 | 2.96230100  |
| H  | -0.63769800 | -3.90432400 | 1.44602800  |
| H  | 0.60435300  | -2.64329500 | 1.47606900  |
| C  | -1.66457100 | -2.50505400 | 4.88460200  |
| H  | -1.54636300 | -1.79940500 | 5.71733800  |
| H  | -2.51194700 | -3.16139500 | 5.12588500  |
| H  | -0.75878000 | -3.12020000 | 4.85236000  |
| C  | -3.77011900 | -0.17865300 | 4.43952500  |
| H  | -3.92351400 | 0.90273200  | 4.35147700  |
| H  | -4.74854700 | -0.67002800 | 4.32964200  |
| H  | -3.41802200 | -0.36703400 | 5.45962800  |
| C  | -3.67160300 | 0.70224000  | 1.39088400  |
| H  | -3.22408600 | 1.12611200  | 0.48484500  |
| H  | -4.64256700 | 0.26477700  | 1.11582300  |

|   |             |            |            |
|---|-------------|------------|------------|
| H | -3.86328900 | 1.53065300 | 2.08102800 |
| C | 3.24398900  | 1.11911000 | 3.00361000 |
| C | 3.21810500  | 0.94202400 | 1.63065800 |
| C | 1.89814100  | 0.58453500 | 1.33555900 |
| N | 1.17223100  | 0.54227100 | 2.45766900 |
| H | 4.04116500  | 1.40529100 | 3.67521900 |
| H | 4.04151300  | 1.06162700 | 0.94091800 |
| H | 1.42391400  | 0.37080100 | 0.38587700 |
| N | 2.00129700  | 0.86917000 | 3.47100900 |
| C | 0.05099100  | 0.60783400 | 4.78671200 |
| C | 1.42677500  | 0.88223900 | 4.76909000 |
| C | -0.54638400 | 0.59971100 | 6.04833600 |
| C | 2.18298600  | 1.12267700 | 5.91631700 |
| C | 0.17424100  | 0.80224200 | 7.22368300 |
| H | -1.61364900 | 0.42631000 | 6.18048900 |
| C | 1.54308500  | 1.07655900 | 7.14658000 |
| H | 3.25281800  | 1.32780400 | 5.84803800 |
| H | 2.06742700  | 1.24160100 | 8.08570000 |
| H | -0.97055200 | 1.73988100 | 2.95287800 |
| C | -0.53579900 | 0.68959100 | 8.59563200 |
| O | -1.73381700 | 0.33544400 | 8.53657400 |
| O | 0.18467300  | 0.95290800 | 9.58126700 |

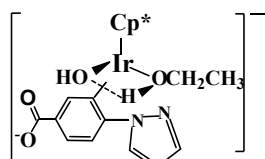

5

57

**E=-1369.6383(au)**

|    |             |             |             |
|----|-------------|-------------|-------------|
| C  | -1.05560200 | -1.61031400 | 2.03149500  |
| C  | -2.19704500 | -0.94037100 | 1.40478300  |
| C  | -3.12581100 | -0.61417000 | 2.40931800  |
| C  | -1.32606400 | -1.74122900 | 3.42801800  |
| C  | -2.57186700 | -1.04349200 | 3.69795300  |
| Ir | -1.18657700 | 0.37744100  | 2.97789000  |
| C  | -2.25962400 | -0.60924400 | -0.04619400 |
| H  | -2.33497900 | -1.51682100 | -0.66170800 |
| H  | -3.11692400 | 0.03135900  | -0.27696600 |
| H  | -1.35539900 | -0.06981700 | -0.35761000 |
| C  | 0.06280300  | -2.23409500 | 1.26942900  |
| H  | 0.89234800  | -2.48500200 | 1.93450200  |
| H  | -0.28014900 | -3.14839400 | 0.76223300  |
| H  | 0.45388700  | -1.55469400 | 0.50117800  |
| C  | -0.50356500 | -2.46394600 | 4.43805700  |

|   |             |             |             |
|---|-------------|-------------|-------------|
| H | -0.61277900 | -2.00839600 | 5.42847500  |
| H | -0.82077100 | -3.51360900 | 4.50968700  |
| H | 0.55911200  | -2.42692200 | 4.17611700  |
| C | -3.29937900 | -0.97528000 | 4.99751000  |
| H | -3.94835300 | -0.09284200 | 5.03224300  |
| H | -3.92737700 | -1.86619600 | 5.14091700  |
| H | -2.62282000 | -0.88626900 | 5.85434400  |
| C | -4.37947000 | 0.17819600  | 2.28025200  |
| H | -4.61663200 | 0.38990000  | 1.23240900  |
| H | -5.23052300 | -0.35322700 | 2.72470000  |
| H | -4.26139900 | 1.13940100  | 2.80017600  |
| C | 3.46694300  | 0.97402800  | 3.55060700  |
| C | 4.19193900  | 0.20652800  | 2.66281400  |
| C | 3.38219000  | -0.92341000 | 2.45796700  |
| N | 2.25559600  | -0.86398100 | 3.16557300  |
| H | 3.66277600  | 1.93473200  | 4.01056200  |
| H | 5.15239000  | 0.43693800  | 2.22233900  |
| H | 3.56490200  | -1.78259800 | 1.82014100  |
| N | 2.31445700  | 0.31048900  | 3.81980500  |
| C | -0.00542700 | 0.80359200  | 4.63168300  |
| C | 1.37644300  | 0.67067300  | 4.85209700  |
| C | -0.75193400 | 1.11986700  | 5.78136100  |
| C | 1.94818400  | 0.86290000  | 6.11884300  |
| C | -0.21915200 | 1.27907800  | 7.05689700  |
| H | -1.83804700 | 1.20733000  | 5.73763700  |
| C | 1.16062600  | 1.17282200  | 7.21496300  |
| H | 3.02538500  | 0.72517800  | 6.22548900  |
| H | 1.57040600  | 1.30844400  | 8.21399000  |
| C | -1.15811200 | 1.49658300  | 8.26748800  |
| O | -2.37514400 | 1.35081800  | 8.01384500  |
| O | -0.57750400 | 1.76774700  | 9.33799700  |
| O | -2.01654000 | 2.27290000  | 3.26964900  |
| H | -1.75144900 | 2.58095000  | 4.14608100  |
| C | 1.78762900  | 1.56269800  | 0.53553300  |
| H | 1.82038700  | 0.56146100  | 0.98197600  |
| H | 1.30535400  | 1.49609300  | -0.44805400 |
| H | 2.81866800  | 1.90834700  | 0.40256600  |
| C | 1.00737500  | 2.48946100  | 1.43206900  |
| H | 1.47061900  | 2.55231600  | 2.42988000  |
| H | 0.97967600  | 3.50723700  | 1.00978400  |
| O | -0.31475100 | 1.99489400  | 1.52406600  |
| H | -0.90550000 | 2.55376900  | 2.11701800  |

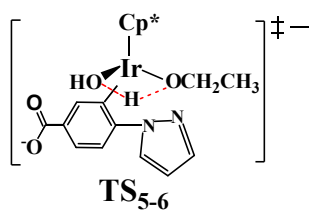

**57 -68.39i cm<sup>-1</sup>**

**E=-1369.631937(au)**

|    |             |             |             |
|----|-------------|-------------|-------------|
| C  | -1.04295700 | -1.58861600 | 2.03823900  |
| C  | -2.18515100 | -0.94152600 | 1.39204700  |
| C  | -3.12103300 | -0.61165000 | 2.38914400  |
| C  | -1.34091900 | -1.72229900 | 3.43951500  |
| C  | -2.59109500 | -1.04591700 | 3.68532600  |
| Ir | -1.17141900 | 0.37764700  | 2.95325900  |
| C  | -2.23163400 | -0.61256100 | -0.05933800 |
| H  | -2.28663500 | -1.52098700 | -0.67532600 |
| H  | -3.09322700 | 0.01713300  | -0.30331600 |
| H  | -1.32990700 | -0.06027500 | -0.35373200 |
| C  | 0.07752800  | -2.22928300 | 1.29439500  |
| H  | 0.91190000  | -2.44965100 | 1.96379300  |
| H  | -0.26345500 | -3.16245900 | 0.82146800  |
| H  | 0.45729500  | -1.57197200 | 0.50241900  |
| C  | -0.51657200 | -2.43450100 | 4.45517800  |
| H  | -0.65102200 | -1.99480400 | 5.44938100  |
| H  | -0.80720800 | -3.49286200 | 4.50701400  |
| H  | 0.54788000  | -2.36704600 | 4.20644700  |
| C  | -3.32978000 | -0.95739700 | 4.97761500  |
| H  | -3.96507100 | -0.06443500 | 5.00263400  |
| H  | -3.97490300 | -1.83548100 | 5.12289900  |
| H  | -2.65934100 | -0.87413700 | 5.83983800  |
| C  | -4.38599600 | 0.15826600  | 2.23917900  |
| H  | -4.53362800 | 0.49637800  | 1.20861500  |
| H  | -5.25385500 | -0.44831500 | 2.52999700  |
| H  | -4.36447700 | 1.04849400  | 2.88001100  |
| C  | 3.49850400  | 0.95609400  | 3.51156700  |
| C  | 4.22494900  | 0.17934700  | 2.63351200  |
| C  | 3.42207100  | -0.95895200 | 2.44921100  |
| N  | 2.29833700  | -0.89628000 | 3.16058200  |
| H  | 3.68698700  | 1.92730600  | 3.95190500  |
| H  | 5.18091400  | 0.41015300  | 2.18380400  |
| H  | 3.60837600  | -1.82677300 | 1.82437000  |
| N  | 2.35174700  | 0.28917700  | 3.79483900  |
| C  | 0.03242800  | 0.79179900  | 4.59677300  |
| C  | 1.41284700  | 0.65726200  | 4.82154200  |

|   |             |            |             |
|---|-------------|------------|-------------|
| C | -0.71812700 | 1.11644400 | 5.74207900  |
| C | 1.97938200  | 0.85456100 | 6.08967900  |
| C | -0.18926400 | 1.28341600 | 7.01834200  |
| H | -1.80463600 | 1.20534400 | 5.69817000  |
| C | 1.18934200  | 1.17291000 | 7.18187200  |
| H | 3.05582400  | 0.71432100 | 6.19998200  |
| H | 1.59656100  | 1.31167700 | 8.18147500  |
| C | -1.13511900 | 1.51386900 | 8.22153800  |
| O | -2.35195900 | 1.38321600 | 7.95799400  |
| O | -0.55948100 | 1.77944800 | 9.29566900  |
| O | -1.96740200 | 2.38295300 | 3.27337600  |
| H | -1.62544000 | 2.68617000 | 4.12644600  |
| C | 1.71358000  | 1.56723200 | 0.61903100  |
| H | 1.76347800  | 0.55791500 | 1.04631700  |
| H | 1.24168500  | 1.50820200 | -0.37053300 |
| H | 2.74004300  | 1.93450400 | 0.49828400  |
| C | 0.90193700  | 2.46262700 | 1.52667400  |
| H | 1.38394000  | 2.53150000 | 2.51908400  |
| H | 0.87341800  | 3.48681500 | 1.11252100  |
| O | -0.41177900 | 1.98474500 | 1.62388400  |
| H | -1.15225800 | 2.52939700 | 2.41185000  |

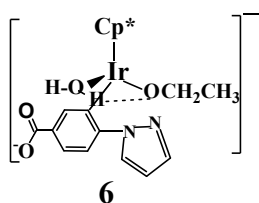

**57**

**E=-1369.635294(au)**

|    |             |             |             |
|----|-------------|-------------|-------------|
| C  | -1.01629400 | -1.51432700 | 2.01197100  |
| C  | -2.15783600 | -0.87699600 | 1.35444300  |
| C  | -3.10980700 | -0.57782300 | 2.34393300  |
| C  | -1.35614200 | -1.70265700 | 3.41000000  |
| C  | -2.61313300 | -1.05619500 | 3.63872400  |
| Ir | -1.15345000 | 0.39615600  | 2.96289400  |
| C  | -2.17496600 | -0.48960800 | -0.08333800 |
| H  | -2.00231700 | -1.35728000 | -0.73355100 |
| H  | -3.13112900 | -0.03832300 | -0.36769000 |
| H  | -1.38803800 | 0.25148600  | -0.28149400 |
| C  | 0.11728900  | -2.14913500 | 1.28496200  |
| H  | 0.98568300  | -2.25475600 | 1.94011100  |
| H  | -0.17725800 | -3.14199500 | 0.91294500  |
| H  | 0.42178000  | -1.54341200 | 0.42330400  |
| C  | -0.53202000 | -2.43341200 | 4.41222500  |

|   |             |             |             |
|---|-------------|-------------|-------------|
| H | -0.70684900 | -2.04876100 | 5.42248600  |
| H | -0.77759500 | -3.50435900 | 4.40326200  |
| H | 0.53459300  | -2.30944400 | 4.19372600  |
| C | -3.38113400 | -0.98863000 | 4.91466100  |
| H | -3.96638600 | -0.06312500 | 4.97041200  |
| H | -4.07912800 | -1.83337400 | 5.00198200  |
| H | -2.72730500 | -0.99024300 | 5.79294700  |
| C | -4.38352800 | 0.17711700  | 2.18759000  |
| H | -4.51682600 | 0.53900200  | 1.16326600  |
| H | -5.24590900 | -0.45180300 | 2.44629300  |
| H | -4.39673900 | 1.04972300  | 2.85211000  |
| C | 3.50524700  | 1.00460600  | 3.48622300  |
| C | 4.26668000  | 0.22224600  | 2.64390300  |
| C | 3.53096800  | -0.96995700 | 2.53696500  |
| N | 2.41268100  | -0.93192000 | 3.25820800  |
| H | 3.64249000  | 2.00746000  | 3.87091100  |
| H | 5.20337300  | 0.48151100  | 2.16991500  |
| H | 3.76283000  | -1.85993500 | 1.96077400  |
| N | 2.40206500  | 0.29141300  | 3.82074300  |
| C | 0.06955600  | 0.76460100  | 4.60920000  |
| C | 1.45258500  | 0.66077900  | 4.83711600  |
| C | -0.68347600 | 1.07606000  | 5.75988500  |
| C | 2.01659200  | 0.89164300  | 6.10090400  |
| C | -0.15428300 | 1.29496300  | 7.02815000  |
| H | -1.77399500 | 1.12105100  | 5.73405900  |
| C | 1.22649100  | 1.22035700  | 7.18960600  |
| H | 3.09620300  | 0.77538100  | 6.20800800  |
| H | 1.63475900  | 1.39351600  | 8.18326300  |
| C | -1.10378600 | 1.56229500  | 8.22205300  |
| O | -2.32188000 | 1.46141300  | 7.95195200  |
| O | -0.52816500 | 1.83199500  | 9.29491100  |
| O | -2.06526600 | 2.44788900  | 3.51653400  |
| H | -1.65988900 | 2.64816200  | 4.37549300  |
| C | 1.58243000  | 1.30469500  | 0.57172400  |
| H | 1.62267500  | 0.32085100  | 1.05582900  |
| H | 1.03484600  | 1.20613900  | -0.37629700 |
| H | 2.61275400  | 1.61355700  | 0.35085200  |
| C | 0.87678300  | 2.29660400  | 1.47697600  |
| H | 1.45280100  | 2.40059200  | 2.41751600  |
| H | 0.89633800  | 3.29371300  | 0.99407100  |
| O | -0.44799000 | 1.94974500  | 1.70513100  |
| H | -1.42866200 | 2.75023100  | 2.80908900  |

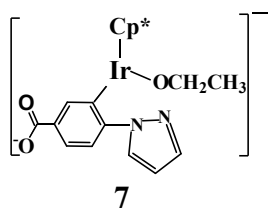

54

E=-1293.206167(au)

|    |             |             |             |
|----|-------------|-------------|-------------|
| C  | -1.24639600 | -1.96405600 | 2.54868300  |
| C  | -2.11850500 | -1.37148700 | 1.52570100  |
| C  | -3.13603800 | -0.66429200 | 2.18922600  |
| C  | -1.80732900 | -1.70334000 | 3.84028700  |
| C  | -2.90939500 | -0.80362500 | 3.63503900  |
| Ir | -1.15111600 | 0.16398500  | 2.86612500  |
| C  | -1.85132100 | -1.42812400 | 0.06190800  |
| H  | -2.09023800 | -2.41496400 | -0.35810700 |
| H  | -2.43484600 | -0.67534000 | -0.47801900 |
| H  | -0.79260600 | -1.22257800 | -0.14033600 |
| C  | -0.07514000 | -2.84009700 | 2.27450000  |
| H  | 0.69530900  | -2.70768800 | 3.04022300  |
| H  | -0.37789900 | -3.89707800 | 2.25468500  |
| H  | 0.38918100  | -2.59379700 | 1.31427400  |
| C  | -1.31768700 | -2.23914200 | 5.14348900  |
| H  | -1.54713900 | -1.58071700 | 5.99215500  |
| H  | -1.76887200 | -3.22182200 | 5.33862200  |
| H  | -0.22889400 | -2.36480800 | 5.12807700  |
| C  | -3.81261600 | -0.26131800 | 4.68892900  |
| H  | -4.08400200 | 0.77928300  | 4.47563900  |
| H  | -4.74195300 | -0.84768000 | 4.72660700  |
| H  | -3.35488100 | -0.28636000 | 5.68521900  |
| C  | -4.19954300 | 0.18758400  | 1.59117100  |
| H  | -3.98086800 | 0.42319300  | 0.54441400  |
| H  | -5.18280500 | -0.30064500 | 1.63828200  |
| H  | -4.27284400 | 1.14031600  | 2.12892500  |
| C  | 3.28998600  | 1.42946000  | 2.85143300  |
| C  | 3.71485300  | 1.03830100  | 1.59786300  |
| C  | 2.83613400  | -0.00223700 | 1.25269200  |
| N  | 1.94797000  | -0.24317600 | 2.21541600  |
| H  | 3.62568300  | 2.21070400  | 3.52131900  |
| H  | 4.52623300  | 1.45658300  | 1.01807100  |
| H  | 2.81046100  | -0.59631500 | 0.34523100  |
| N  | 2.23861400  | 0.64197600  | 3.18639800  |
| C  | 0.09889400  | 0.67738200  | 4.41076800  |
| C  | 1.50167000  | 0.69241800  | 4.41586500  |

|   |             |            |            |
|---|-------------|------------|------------|
| C | -0.50521800 | 0.74870600 | 5.67040500 |
| C | 2.23706200  | 0.75569300 | 5.60605000 |
| C | 0.18978600  | 0.73409700 | 6.87247800 |
| H | -1.58752200 | 0.73644700 | 5.76463700 |
| C | 1.58301000  | 0.77113200 | 6.83184300 |
| H | 3.32664400  | 0.73386400 | 5.55199000 |
| H | 2.12207000  | 0.76790800 | 7.77744200 |
| C | -0.59663200 | 0.52209100 | 8.18213600 |
| O | -1.78314100 | 0.13874300 | 8.01239200 |
| O | 0.04356700  | 0.71088300 | 9.23329400 |
| C | 0.75289300  | 3.30918800 | 0.96883100 |
| H | 1.42739300  | 2.48019000 | 0.71976500 |
| H | 0.13227200  | 3.52143500 | 0.08930700 |
| H | 1.36272200  | 4.19600300 | 1.18805500 |
| C | -0.11644900 | 2.93658400 | 2.15482400 |
| H | 0.51699500  | 2.75862500 | 3.03806200 |
| H | -0.77403700 | 3.78921700 | 2.41054700 |
| O | -0.90769300 | 1.82961400 | 1.83313700 |

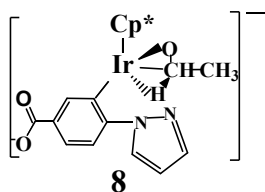

54

**E=-1293.187847(au)**

|    |             |             |             |
|----|-------------|-------------|-------------|
| C  | -0.55034600 | -2.00214900 | -1.19115900 |
| C  | -1.49781800 | -1.36001500 | -2.09831500 |
| C  | -2.49676400 | -0.74025800 | -1.32449400 |
| C  | -1.02572900 | -1.83488400 | 0.14570700  |
| C  | -2.19472300 | -0.97708500 | 0.08741500  |
| Ir | -0.50322700 | 0.12858200  | -0.63767300 |
| C  | -1.34531100 | -1.34571900 | -3.58120900 |
| H  | -1.54574000 | -2.33650800 | -4.01245200 |
| H  | -2.02873500 | -0.63147700 | -4.05288800 |
| H  | -0.32240900 | -1.06719000 | -3.86815700 |
| C  | 0.60240000  | -2.84768500 | -1.61005800 |
| H  | 1.42344900  | -2.77163100 | -0.89071500 |
| H  | 0.30125000  | -3.90095900 | -1.70799900 |
| H  | 1.00208600  | -2.51799800 | -2.57681900 |
| C  | -0.44128700 | -2.45250200 | 1.37001400  |
| H  | -0.72704400 | -1.91305800 | 2.28080000  |
| H  | -0.78300400 | -3.49276400 | 1.46167500  |
| H  | 0.65422500  | -2.45414400 | 1.32019900  |
| C  | -3.09650100 | -0.60931600 | 1.21807600  |



|   |             |             |             |
|---|-------------|-------------|-------------|
| H | -3.47083000 | 0.41471800  | 1.09723700  |
| H | -3.96821200 | -1.28012700 | 1.23825800  |
| H | -2.60709400 | -0.66005000 | 2.20056200  |
| C | -3.62238900 | 0.11415700  | -1.79427300 |
| H | -3.56465700 | 0.30373100  | -2.87154700 |
| H | -4.59319400 | -0.35347400 | -1.58119600 |
| H | -3.60026300 | 1.08702800  | -1.28761700 |
| C | 3.62425700  | 1.38212000  | -0.57189200 |
| C | 4.19166200  | 0.91209700  | -1.73949200 |
| C | 3.70538300  | -0.40402100 | -1.84424100 |
| N | 2.90763300  | -0.72171500 | -0.82674300 |
| H | 3.68130300  | 2.33673000  | -0.06359800 |
| H | 4.86083600  | 1.43891700  | -2.40596900 |
| H | 3.91060000  | -1.14425500 | -2.61057900 |
| N | 2.86358800  | 0.38395400  | -0.06227900 |
| C | 0.64979500  | 0.53798100  | 1.02161300  |
| C | 2.04602300  | 0.45855300  | 1.11935600  |
| C | -0.03890700 | 0.61291600  | 2.23277900  |
| C | 2.70201900  | 0.43837700  | 2.35500100  |
| C | 0.57188400  | 0.47354100  | 3.47461600  |
| H | -1.12269500 | 0.68087700  | 2.24528100  |
| C | 1.96475300  | 0.42770800  | 3.53173600  |
| H | 3.79148000  | 0.38025800  | 2.36528400  |
| H | 2.43165400  | 0.34818800  | 4.51194400  |
| C | -0.30684100 | 0.20105800  | 4.71172100  |
| O | -1.46936500 | -0.19159500 | 4.43342500  |
| O | 0.24890600  | 0.34879300  | 5.81571700  |
| C | 0.15326300  | 2.31095200  | -3.14067800 |
| H | -0.66541100 | 1.67273000  | -3.49678000 |
| H | -0.12602400 | 3.35506900  | -3.32412300 |
| H | 1.06294300  | 2.08323100  | -3.71273600 |
| C | 0.35958500  | 2.09353100  | -1.65263300 |
| H | 0.87393600  | 1.00791200  | -1.58498900 |
| H | 1.21219700  | 2.69176400  | -1.26718800 |
| O | -0.75910600 | 2.19093000  | -0.89413400 |

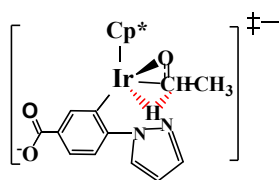

TS<sub>8-9</sub>

54 -483.76i cm<sup>-1</sup>

E=-1293.180757(au)

|   |             |             |            |
|---|-------------|-------------|------------|
| C | -1.06739600 | -1.68081200 | 2.40844400 |
|---|-------------|-------------|------------|

|    |             |             |             |
|----|-------------|-------------|-------------|
| C  | -2.02396600 | -1.06852300 | 1.49908100  |
| C  | -3.03676600 | -0.46791600 | 2.28035000  |
| C  | -1.56825400 | -1.52853700 | 3.74848400  |
| C  | -2.75926800 | -0.72845000 | 3.68789300  |
| Ir | -1.03678500 | 0.44810500  | 2.92973900  |
| C  | -1.89356700 | -1.07971400 | 0.01353600  |
| H  | -2.08915600 | -2.08077200 | -0.39612200 |
| H  | -2.59572100 | -0.38565400 | -0.46139200 |
| H  | -0.88078100 | -0.79209700 | -0.29764500 |
| C  | 0.09139500  | -2.52653100 | 2.00705500  |
| H  | 0.90132300  | -2.44805700 | 2.73869100  |
| H  | -0.20677100 | -3.58115500 | 1.91039300  |
| H  | 0.50329500  | -2.19890900 | 1.04482400  |
| C  | -0.96396700 | -2.13168400 | 4.97098100  |
| H  | -1.35866700 | -1.68163300 | 5.88911800  |
| H  | -1.17563100 | -3.20985000 | 4.99143800  |
| H  | 0.12476300  | -1.99749700 | 4.98035600  |
| C  | -3.65969600 | -0.36401500 | 4.82203100  |
| H  | -4.07838800 | 0.64004900  | 4.67827200  |
| H  | -4.50431900 | -1.06631600 | 4.88155000  |
| H  | -3.15147500 | -0.36015300 | 5.79816900  |
| C  | -4.18763800 | 0.35146800  | 1.80509900  |
| H  | -4.15009300 | 0.51615100  | 0.72269600  |
| H  | -5.14327100 | -0.13616900 | 2.04032100  |
| H  | -4.18804500 | 1.33523100  | 2.29078500  |
| C  | 2.93376400  | 1.58156800  | 2.88697100  |
| C  | 3.57069700  | 1.03612100  | 1.79030300  |
| C  | 3.31363000  | -0.34284700 | 1.90415300  |
| N  | 2.58027500  | -0.62550900 | 2.97786700  |
| H  | 2.84735000  | 2.59800000  | 3.25072600  |
| H  | 4.14733500  | 1.55474400  | 1.03647100  |
| H  | 3.64082000  | -1.14808400 | 1.25482200  |
| N  | 2.35133100  | 0.56331300  | 3.56355400  |
| C  | 0.12473300  | 0.83988900  | 4.59094600  |
| C  | 1.51131400  | 0.68263500  | 4.72590400  |
| C  | -0.59700100 | 0.94897400  | 5.78090500  |
| C  | 2.12639900  | 0.60295600  | 5.97929200  |
| C  | -0.03224800 | 0.75215300  | 7.03706100  |
| H  | -1.67613300 | 1.07520200  | 5.75519200  |
| C  | 1.35329100  | 0.61810000  | 7.13280300  |
| H  | 3.20967600  | 0.48375000  | 6.02102600  |
| H  | 1.78492600  | 0.49578100  | 8.12464500  |
| C  | -0.95628600 | 0.50002300  | 8.24463500  |
| O  | -2.11979300 | 0.13937100  | 7.92748200  |

|   |             |            |             |
|---|-------------|------------|-------------|
| O | -0.43290100 | 0.62621500 | 9.36645000  |
| C | -0.58956800 | 2.52338800 | 0.49863000  |
| H | -1.49749300 | 1.98469400 | 0.20403000  |
| H | -0.71938700 | 3.58320800 | 0.24496600  |
| H | 0.26556100  | 2.13032700 | -0.06635600 |
| C | -0.37128900 | 2.39241100 | 1.99052900  |
| H | 0.27990800  | 1.11160900 | 2.08421600  |
| H | 0.56946800  | 2.87047200 | 2.33072500  |
| O | -1.40540700 | 2.55035200 | 2.78911900  |

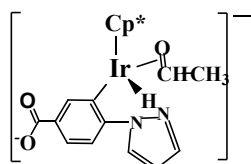

9

54

E=-1293.189769(au)

|    |             |             |             |
|----|-------------|-------------|-------------|
| C  | -0.48884100 | -1.90991900 | -1.02784500 |
| C  | -1.32867400 | -1.31559900 | -2.06289500 |
| C  | -2.40551300 | -0.67353300 | -1.40360700 |
| C  | -1.16751400 | -1.75558500 | 0.24163600  |
| C  | -2.30045300 | -0.94039300 | 0.02868200  |
| Ir | -0.39580100 | 0.24883500  | -0.70520300 |
| C  | -1.09037200 | -1.41729800 | -3.53166600 |
| H  | -1.44777600 | -2.37780200 | -3.93026900 |
| H  | -1.60323600 | -0.61865200 | -4.07960400 |
| H  | -0.02234900 | -1.33854200 | -3.76435900 |
| C  | 0.68843500  | -2.79833100 | -1.25787700 |
| H  | 1.45049100  | -2.65695800 | -0.48357000 |
| H  | 0.38737500  | -3.85597000 | -1.26685600 |
| H  | 1.17337700  | -2.57145300 | -2.21417600 |
| C  | -0.70512500 | -2.32945500 | 1.53605300  |
| H  | -1.07125400 | -1.76528700 | 2.40555100  |
| H  | -1.05504900 | -3.36841600 | 1.62063500  |
| H  | 0.38978600  | -2.34567300 | 1.58778500  |
| C  | -3.24961200 | -0.44658300 | 1.06976500  |
| H  | -3.55667200 | 0.58568300  | 0.85905900  |
| H  | -4.16125700 | -1.06115500 | 1.09018600  |
| H  | -2.80476700 | -0.45609000 | 2.07621200  |
| C  | -3.53578300 | 0.07955400  | -2.01837900 |
| H  | -3.39889700 | 0.20833400  | -3.09791600 |
| H  | -4.48634600 | -0.44911100 | -1.86315400 |
| H  | -3.64084300 | 1.07534000  | -1.56889200 |
| C  | 3.44397200  | 1.17531300  | -0.85258400 |

|   |             |             |             |
|---|-------------|-------------|-------------|
| C | 4.19619500  | 0.59320300  | -1.85226600 |
| C | 4.18645600  | -0.77574700 | -1.52792100 |
| N | 3.48843300  | -1.02223100 | -0.42150400 |
| H | 3.16517100  | 2.20201500  | -0.65218900 |
| H | 4.68673900  | 1.08707900  | -2.68000700 |
| H | 4.66869900  | -1.59641200 | -2.04805200 |
| N | 3.04152600  | 0.18416200  | -0.02333400 |
| C | 0.80469100  | 0.55923000  | 0.94001400  |
| C | 2.17420600  | 0.32016900  | 1.11017000  |
| C | 0.04255800  | 0.66691700  | 2.10577600  |
| C | 2.73174400  | 0.15477200  | 2.38234000  |
| C | 0.54779900  | 0.39606900  | 3.37239900  |
| H | -1.02988200 | 0.83991000  | 2.04224900  |
| C | 1.91917500  | 0.17575900  | 3.50823100  |
| H | 3.80316700  | -0.03229800 | 2.45618400  |
| H | 2.30924600  | -0.00753600 | 4.50764400  |
| C | -0.43274800 | 0.15040200  | 4.53518800  |
| O | -1.59812700 | -0.15577200 | 4.16402100  |
| O | 0.04778400  | 0.22363900  | 5.67936900  |
| C | -0.82673500 | 2.49724400  | -2.81638300 |
| H | -1.81639800 | 2.04395600  | -2.94217800 |
| H | -0.92504200 | 3.57865400  | -2.99336600 |
| H | -0.14461000 | 2.09015500  | -3.57280500 |
| C | -0.29249700 | 2.24260600  | -1.43070200 |
| H | 1.00650200  | 0.25855700  | -1.45610300 |
| H | 0.72145500  | 2.64429900  | -1.25622900 |
| O | -1.09563100 | 2.22604600  | -0.40067400 |

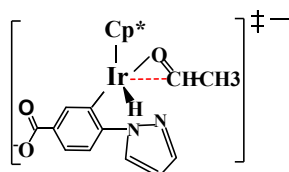

TS<sub>9-10</sub>

54 -63.92i cm<sup>-1</sup>

E=-1293.177091(au)

|    |             |             |             |
|----|-------------|-------------|-------------|
| C  | -0.37948800 | -1.98909500 | -1.07034000 |
| C  | -1.32428500 | -1.60327700 | -2.12356800 |
| C  | -2.46956700 | -1.08458700 | -1.47733200 |
| C  | -1.08278900 | -1.88122700 | 0.21254600  |
| C  | -2.32064600 | -1.26623800 | -0.02712100 |
| Ir | -0.62595700 | 0.09169600  | -0.87767300 |
| C  | -1.08439800 | -1.74549700 | -3.58766800 |
| H  | -1.30776300 | -2.76580100 | -3.93251900 |
| H  | -1.70588800 | -1.05158800 | -4.16457500 |

|   |             |             |             |
|---|-------------|-------------|-------------|
| H | -0.03897900 | -1.53002000 | -3.83417400 |
| C | 0.92328000  | -2.68127300 | -1.28265100 |
| H | 1.62654400  | -2.46622700 | -0.46942500 |
| H | 0.79091100  | -3.77180500 | -1.34836200 |
| H | 1.40009800  | -2.33557300 | -2.20740400 |
| C | -0.52681900 | -2.27965100 | 1.53498800  |
| H | -0.98088000 | -1.71464100 | 2.35972900  |
| H | -0.70194300 | -3.35155600 | 1.70475600  |
| H | 0.55515100  | -2.10840700 | 1.57665500  |
| C | -3.30625200 | -0.82040200 | 1.00078200  |
| H | -3.77442500 | 0.12526300  | 0.69869000  |
| H | -4.11185100 | -1.55766000 | 1.12831800  |
| H | -2.83425300 | -0.64863600 | 1.97996800  |
| C | -3.67737800 | -0.49093400 | -2.11677100 |
| H | -3.48842200 | -0.22929900 | -3.16355200 |
| H | -4.52868300 | -1.18590900 | -2.08515400 |
| H | -3.98168400 | 0.42493700  | -1.59730500 |
| C | 3.02602400  | 0.78646600  | -1.38028800 |
| C | 3.98589300  | 0.13427700  | -2.12739700 |
| C | 4.36570600  | -0.95032600 | -1.31720500 |
| N | 3.69787300  | -0.97171100 | -0.16668300 |
| H | 2.43512200  | 1.67190000  | -1.57097900 |
| H | 4.35775700  | 0.41093700  | -3.10473000 |
| H | 5.10088200  | -1.72172300 | -1.52004400 |
| N | 2.87754600  | 0.09919800  | -0.22427000 |
| C | 0.63563800  | 0.62347800  | 0.67947400  |
| C | 2.00714800  | 0.40325600  | 0.87414000  |
| C | -0.11205100 | 0.83848600  | 1.85021800  |
| C | 2.57749700  | 0.38362500  | 2.15368200  |
| C | 0.40311300  | 0.71723500  | 3.13543800  |
| H | -1.19536900 | 0.95592200  | 1.79027400  |
| C | 1.77885100  | 0.52961400  | 3.27913000  |
| H | 3.64764900  | 0.19820700  | 2.23702200  |
| H | 2.18373900  | 0.46035200  | 4.28716900  |
| C | -0.56341000 | 0.58633200  | 4.32712300  |
| O | -1.71646400 | 0.19251300  | 4.00698100  |
| O | -0.08391700 | 0.83031100  | 5.44889000  |
| C | -0.56614200 | 4.00328600  | -1.76896000 |
| H | -1.36957500 | 4.07184900  | -2.50666500 |
| H | -0.36048200 | 4.97938800  | -1.31591000 |
| H | 0.35705500  | 3.67799300  | -2.26954800 |
| C | -0.88344900 | 2.98477700  | -0.72900800 |
| H | 0.34661200  | 0.81414300  | -1.94986700 |
| H | -0.19482800 | 2.92000700  | 0.13689600  |

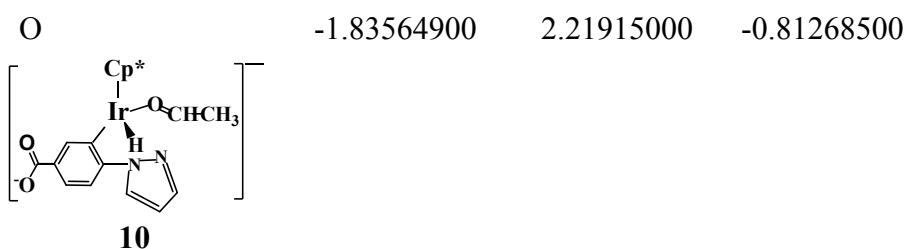

**54**

**E=-1293.185134(au)**

|    |             |             |             |
|----|-------------|-------------|-------------|
| C  | -0.51822600 | -2.20989600 | -1.28151900 |
| C  | -1.33526700 | -1.60658300 | -2.32551900 |
| C  | -2.45157200 | -1.00984600 | -1.69414200 |
| C  | -1.24499100 | -2.07229200 | -0.02565500 |
| C  | -2.41782000 | -1.31739700 | -0.26989800 |
| Ir | -0.53566000 | -0.10959300 | -0.83177100 |
| C  | -1.02121800 | -1.64478300 | -3.78226600 |
| H  | -1.31631400 | -2.60397000 | -4.23374000 |
| H  | -1.53652400 | -0.84500700 | -4.32573800 |
| H  | 0.05308800  | -1.51269900 | -3.95132200 |
| C  | 0.63527600  | -3.12168300 | -1.52214100 |
| H  | 1.32152800  | -3.12613800 | -0.67067200 |
| H  | 0.28956300  | -4.14964600 | -1.71334200 |
| H  | 1.21995100  | -2.79031100 | -2.38809700 |
| C  | -0.78311600 | -2.62726500 | 1.27830200  |
| H  | -1.11689800 | -2.01373500 | 2.12169900  |
| H  | -1.15807700 | -3.64986300 | 1.42506300  |
| H  | 0.31107600  | -2.65524600 | 1.31921100  |
| C  | -3.43957700 | -0.86511100 | 0.71833200  |
| H  | -3.61706600 | 0.21576200  | 0.64233400  |
| H  | -4.40491400 | -1.37162200 | 0.57153100  |
| H  | -3.11319200 | -1.05952800 | 1.74515000  |
| C  | -3.53917300 | -0.22034400 | -2.33912700 |
| H  | -3.29857600 | 0.02266400  | -3.37961000 |
| H  | -4.48727500 | -0.77711000 | -2.33229000 |
| H  | -3.70988400 | 0.72392100  | -1.80830500 |
| C  | 3.52108900  | 0.72068600  | -0.95630800 |
| C  | 4.17799000  | -0.13938100 | -1.81203900 |
| C  | 3.81578400  | -1.41611400 | -1.34684900 |
| N  | 3.00762500  | -1.35258800 | -0.29076400 |
| H  | 3.46370000  | 1.80088200  | -0.90657000 |
| H  | 4.81773700  | 0.11951700  | -2.64469300 |
| H  | 4.11504000  | -2.38606300 | -1.73075400 |
| N  | 2.83937000  | -0.03943400 | -0.06843600 |
| C  | 0.58328100  | 0.42048700  | 0.82103400  |
| C  | 1.97794300  | 0.45506500  | 0.96640700  |

|   |             |            |             |
|---|-------------|------------|-------------|
| C | -0.13430500 | 0.99182900 | 1.89210600  |
| C | 2.60594600  | 1.04244700 | 2.06976100  |
| C | 0.46151000  | 1.64699400 | 2.97042300  |
| H | -1.22536200 | 1.02445000 | 1.86258800  |
| C | 1.85308500  | 1.64465900 | 3.06656000  |
| H | 3.69582700  | 1.03181900 | 2.11252200  |
| H | 2.30664700  | 2.13290700 | 3.92663900  |
| C | -0.38608300 | 2.44869100 | 3.97195400  |
| O | -1.52254500 | 2.79726500 | 3.54086600  |
| O | 0.14712300  | 2.69755000 | 5.06529400  |
| C | -1.47527000 | 3.92348800 | 0.71282800  |
| H | -2.51564900 | 4.01375900 | 0.38749600  |
| H | -1.47882600 | 3.57724200 | 1.78719400  |
| H | -0.95100900 | 4.88308200 | 0.67222000  |
| C | -0.77360700 | 2.86971500 | -0.02895500 |
| H | 0.71859100  | 0.49030200 | -1.64950800 |
| H | 0.33266800  | 2.87607400 | -0.01609500 |
| O | -1.36460200 | 1.94825400 | -0.59997200 |

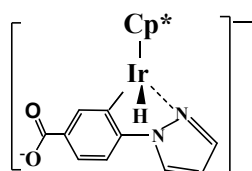

11

47

**E=-1139.396374(au)**

|    |             |             |             |
|----|-------------|-------------|-------------|
| C  | -0.58796000 | -2.48986700 | -1.33947300 |
| C  | -1.31709200 | -1.79691000 | -2.37930100 |
| C  | -2.24623400 | -0.95930800 | -1.71057100 |
| C  | -1.24934900 | -2.24106800 | -0.05206000 |
| C  | -2.24983900 | -1.28199000 | -0.27573800 |
| Ir | -0.23038300 | -0.44068400 | -0.93577500 |
| C  | -1.04529300 | -1.86910200 | -3.84290500 |
| H  | -1.59044700 | -2.69520800 | -4.32189100 |
| H  | -1.33463800 | -0.93990600 | -4.34620300 |
| H  | 0.02337300  | -2.01442100 | -4.03650200 |
| C  | 0.51158700  | -3.47401200 | -1.53345800 |
| H  | 1.28046200  | -3.34393900 | -0.76351800 |
| H  | 0.12614900  | -4.50308800 | -1.48394100 |
| H  | 0.99906100  | -3.33364400 | -2.50425600 |
| C  | -0.82625100 | -2.84724700 | 1.24038700  |
| H  | -1.19175400 | -2.26677700 | 2.09296200  |
| H  | -1.19777600 | -3.87691700 | 1.33866100  |
| H  | 0.26758200  | -2.87156600 | 1.31227200  |
| C  | -3.16281700 | -0.65971000 | 0.72274600  |

|   |             |             |             |
|---|-------------|-------------|-------------|
| H | -3.29929500 | 0.40971000  | 0.52377900  |
| H | -4.15607200 | -1.12970700 | 0.69354900  |
| H | -2.77933100 | -0.73309500 | 1.74583100  |
| C | -3.17881900 | 0.01873100  | -2.33464300 |
| H | -2.83907700 | 0.31592200  | -3.33189300 |
| H | -4.18976300 | -0.40345600 | -2.42770200 |
| H | -3.25441900 | 0.92706300  | -1.72650300 |
| C | 3.91727300  | 0.65781500  | -0.84192600 |
| C | 4.51429400  | -0.22315000 | -1.72078600 |
| C | 3.88423400  | -1.45000400 | -1.44837600 |
| N | 2.97748100  | -1.34098900 | -0.48008900 |
| H | 4.04130300  | 1.72011200  | -0.67579000 |
| H | 5.28409600  | -0.00756000 | -2.44919500 |
| H | 4.05499900  | -2.41756900 | -1.90928600 |
| N | 3.01201700  | -0.04472100 | -0.12144300 |
| C | 0.72895500  | 0.37034300  | 0.66762500  |
| C | 2.11551500  | 0.48348100  | 0.86160400  |
| C | -0.07330000 | 0.85336800  | 1.71641100  |
| C | 2.66231700  | 1.07394300  | 1.99933000  |
| C | 0.43954100  | 1.45283800  | 2.86370400  |
| H | -1.15987800 | 0.79585000  | 1.67515600  |
| C | 1.82220400  | 1.57275400  | 2.99034900  |
| H | 3.74767000  | 1.10668600  | 2.10690500  |
| H | 2.20165300  | 2.03244100  | 3.90120400  |
| C | -0.52158600 | 1.91242800  | 3.98746300  |
| O | -1.72753100 | 1.64304300  | 3.78677600  |
| O | 0.03291900  | 2.47847400  | 4.95154900  |
| H | 0.85266800  | 0.32156800  | -1.88535900 |

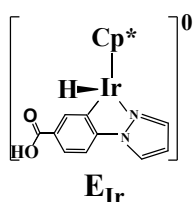

**48**

**E=-1139.884306(au)**

|    |             |             |             |
|----|-------------|-------------|-------------|
| C  | -1.27237100 | -2.07532600 | 2.30478000  |
| C  | -1.81077100 | -1.10966100 | 1.35820400  |
| C  | -2.77423300 | -0.31965100 | 2.04034500  |
| C  | -1.90022600 | -1.86842100 | 3.55660400  |
| C  | -2.79641300 | -0.73166300 | 3.42734400  |
| Ir | -0.80692600 | 0.07995800  | 3.03487400  |
| C  | -1.49500600 | -1.06747300 | -0.09929200 |
| H  | -2.15987300 | -1.72649400 | -0.67518100 |
| H  | -1.60005000 | -0.05509600 | -0.50552300 |



|   |             |             |             |
|---|-------------|-------------|-------------|
| H | -0.46912600 | -1.40047500 | -0.29619800 |
| C | -0.25232400 | -3.10763600 | 1.96302700  |
| H | 0.17597100  | -3.56316100 | 2.86152600  |
| H | -0.68539200 | -3.91280000 | 1.35398400  |
| H | 0.57713500  | -2.67612900 | 1.38793900  |
| C | -1.69058800 | -2.63952200 | 4.81354400  |
| H | -1.61335100 | -1.97360000 | 5.68184000  |
| H | -2.52680200 | -3.32629100 | 4.99992400  |
| H | -0.77093300 | -3.23244900 | 4.77475300  |
| C | -3.78006400 | -0.27242100 | 4.45171000  |
| H | -3.91879700 | 0.81362500  | 4.41517200  |
| H | -4.76215000 | -0.74293900 | 4.30345200  |
| H | -3.45094300 | -0.52407900 | 5.46587900  |
| C | -3.65145100 | 0.72775200  | 1.44424600  |
| H | -3.18537600 | 1.19625100  | 0.57116300  |
| H | -4.60961700 | 0.29627000  | 1.12381100  |
| H | -3.86716700 | 1.51998700  | 2.16826000  |
| C | 3.24782500  | 1.09765700  | 3.02134700  |
| C | 3.22064700  | 0.88732500  | 1.65994100  |
| C | 1.90236600  | 0.50207000  | 1.37338500  |
| N | 1.17737600  | 0.47432800  | 2.49004400  |
| H | 4.04734700  | 1.41140500  | 3.67742600  |
| H | 4.04002800  | 1.00116100  | 0.96534300  |
| H | 1.43880400  | 0.25956900  | 0.42562400  |
| N | 2.00422400  | 0.83996600  | 3.49711500  |
| C | 0.05652500  | 0.56881800  | 4.81690600  |
| C | 1.42909700  | 0.88577300  | 4.78664500  |
| C | -0.53378700 | 0.62101800  | 6.08253500  |
| C | 2.17800400  | 1.22527700  | 5.90690100  |
| C | 0.19128700  | 0.92630200  | 7.23669300  |
| H | -1.59992100 | 0.43223500  | 6.20119800  |
| C | 1.55194600  | 1.24029900  | 7.14516700  |
| H | 3.23178000  | 1.48450600  | 5.82432000  |
| H | 2.12347900  | 1.55239800  | 8.01818200  |
| H | -0.96735400 | 1.67324300  | 2.96607000  |
| C | -0.54773800 | 0.93371000  | 8.53030100  |
| O | -1.74450400 | 1.03730000  | 8.62058800  |
| O | 0.20467200  | 0.80435900  | 9.64862800  |
| H | 1.10917800  | 0.56970500  | 9.40875300  |

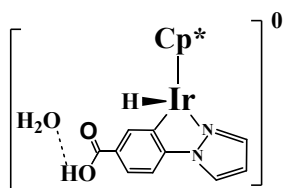

**EIr'****51****E=-1216.323131(au)**

|    |             |             |             |
|----|-------------|-------------|-------------|
| C  | -1.07494700 | -2.13244100 | 2.66115500  |
| C  | -1.60939500 | -1.37324800 | 1.54090300  |
| C  | -2.70145000 | -0.59865600 | 2.01630500  |
| C  | -1.83067900 | -1.81145800 | 3.81434400  |
| C  | -2.81164000 | -0.80511200 | 3.44566900  |
| Ir | -0.87831800 | 0.14412300  | 3.08532900  |
| C  | -1.14372800 | -1.49607600 | 0.12910200  |
| H  | -1.62430100 | -2.34042800 | -0.38463600 |
| H  | -1.36218900 | -0.58956200 | -0.44614200 |
| H  | -0.06095500 | -1.66721400 | 0.08042800  |
| C  | 0.06208900  | -3.09106600 | 2.55610800  |
| H  | 0.41847800  | -3.40267100 | 3.54302900  |
| H  | -0.22653100 | -3.99573400 | 2.00367300  |
| H  | 0.91501300  | -2.64633800 | 2.02673300  |
| C  | -1.67086500 | -2.37020300 | 5.18615300  |
| H  | -1.71038300 | -1.57884600 | 5.94510900  |
| H  | -2.47129000 | -3.08567800 | 5.41672800  |
| H  | -0.71336900 | -2.88911000 | 5.30131600  |
| C  | -3.91921400 | -0.30861300 | 4.31348700  |
| H  | -4.18525300 | 0.72546000  | 4.06888900  |
| H  | -4.82260300 | -0.92489300 | 4.20422200  |
| H  | -3.63931700 | -0.32856100 | 5.37262400  |
| C  | -3.60943300 | 0.26051200  | 1.20369200  |
| H  | -3.11238700 | 0.63619000  | 0.30348100  |
| H  | -4.49932900 | -0.30136300 | 0.88898100  |
| H  | -3.94824300 | 1.12896400  | 1.77765500  |
| C  | 3.02796300  | 1.62596000  | 3.12795900  |
| C  | 3.12404200  | 1.20140200  | 1.82003100  |
| C  | 1.88271900  | 0.61472200  | 1.53157500  |
| N  | 1.08705600  | 0.67486800  | 2.59803200  |
| H  | 3.73620700  | 2.13705300  | 3.76471300  |
| H  | 3.97362100  | 1.30552800  | 1.16111300  |
| H  | 1.51555700  | 0.17056300  | 0.61467200  |
| N  | 1.79074800  | 1.29399700  | 3.57260900  |
| C  | -0.20133800 | 0.98378700  | 4.81751300  |
| C  | 1.12348400  | 1.46354100  | 4.80664900  |
| C  | -0.88171300 | 1.15036500  | 6.02858000  |
| C  | 1.74557300  | 2.06542600  | 5.89488300  |
| C  | -0.27982700 | 1.71180000  | 7.15574400  |
| H  | -1.92596000 | 0.85164200  | 6.11874000  |
| C  | 1.03607100  | 2.18683100  | 7.08336400  |

|   |             |             |            |
|---|-------------|-------------|------------|
| H | 2.76061500  | 2.45231500  | 5.82152300 |
| H | 1.49129600  | 2.68482400  | 7.93714100 |
| H | -1.19257700 | 1.68410400  | 2.77719200 |
| C | -1.10269400 | 1.83787800  | 8.39884900 |
| O | -2.30356900 | 1.96334500  | 8.36942800 |
| O | -0.43827000 | 1.80742500  | 9.56263800 |
| H | 0.45744500  | 1.42062500  | 9.46368600 |
| O | 1.90632500  | 0.32187300  | 9.25848300 |
| H | 1.63911400  | -0.57415000 | 9.48438200 |
| H | 1.99358300  | 0.33420900  | 8.29689600 |

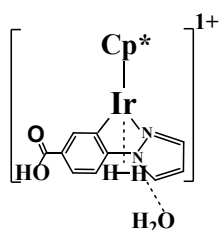

12

52

**E=-1216.762451(au)**

|    |             |             |             |
|----|-------------|-------------|-------------|
| C  | -1.06481300 | -1.79203200 | 2.69625900  |
| C  | -1.60022200 | -1.07556800 | 1.53603100  |
| C  | -2.72041700 | -0.33238000 | 1.96799500  |
| C  | -1.94889300 | -1.55564600 | 3.80733700  |
| C  | -2.90986600 | -0.57323500 | 3.39674500  |
| Ir | -0.90117500 | 0.32040900  | 3.17989000  |
| C  | -1.05819800 | -1.14662300 | 0.15106600  |
| H  | -1.56635800 | -1.93373500 | -0.41979000 |
| H  | -1.19576200 | -0.20152400 | -0.38507000 |
| H  | 0.00982400  | -1.38655800 | 0.14834700  |
| C  | 0.08705300  | -2.73701100 | 2.67132100  |
| H  | 0.52183600  | -2.85909300 | 3.66866400  |
| H  | -0.22200400 | -3.72788600 | 2.31625800  |
| H  | 0.88094600  | -2.37634400 | 2.00781800  |
| C  | -1.87413300 | -2.22553300 | 5.13190400  |
| H  | -2.32268700 | -1.63617200 | 5.93678400  |
| H  | -2.42083800 | -3.17583500 | 5.07999600  |
| H  | -0.84390000 | -2.45258200 | 5.42081500  |
| C  | -4.04602200 | -0.05908700 | 4.21318700  |
| H  | -4.32709400 | 0.95638900  | 3.91661300  |
| H  | -4.93039000 | -0.69710500 | 4.09101700  |
| H  | -3.79828600 | -0.03655900 | 5.27900000  |
| C  | -3.59633300 | 0.53816700  | 1.13660300  |
| H  | -3.10932500 | 0.83376500  | 0.20307600  |
| H  | -4.51881500 | 0.00365100  | 0.87658900  |

|   |             |             |            |
|---|-------------|-------------|------------|
| H | -3.89019300 | 1.44613300  | 1.67429600 |
| C | 3.25175600  | 0.86100200  | 2.99805000 |
| C | 3.10511600  | 0.96233900  | 1.62926600 |
| C | 1.72796600  | 0.86055400  | 1.39720700 |
| N | 1.08182900  | 0.70403600  | 2.55285800 |
| H | 4.13436100  | 0.89406600  | 3.62180500 |
| H | 3.88870800  | 1.09328200  | 0.89749300 |
| H | 1.16876000  | 0.90737900  | 0.47094500 |
| N | 2.01893900  | 0.70489500  | 3.53071500 |
| C | 0.14061900  | 0.50288500  | 4.96099700 |
| C | 1.53558700  | 0.60570200  | 4.85632900 |
| C | -0.38360900 | 0.44074200  | 6.24349800 |
| C | 2.38320100  | 0.61230000  | 5.95729800 |
| C | 0.43715800  | 0.44113000  | 7.37431800 |
| H | -1.45788400 | 0.37894100  | 6.40715000 |
| C | 1.82298200  | 0.52035600  | 7.22582100 |
| H | 3.46270200  | 0.67052300  | 5.83878300 |
| H | 2.48615400  | 0.47117400  | 8.08753400 |
| H | -1.23146500 | 2.01048300  | 3.59494600 |
| C | -0.24961900 | 0.26732900  | 8.69149400 |
| O | -1.34032200 | -0.23606100 | 8.77922500 |
| O | 0.40776800  | 0.68582300  | 9.78508800 |
| O | -0.80288900 | 2.90272100  | 0.80015700 |
| H | -0.04329400 | 3.49396600  | 0.77714900 |
| H | -1.51068500 | 3.40185100  | 0.37982800 |
| H | -1.10605200 | 2.03218900  | 2.73964500 |
| H | 1.18464700  | 1.20807100  | 9.55096300 |

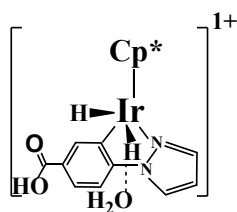

12'

52

E=-1216.752397(au)

|    |             |             |             |
|----|-------------|-------------|-------------|
| C  | -0.61375900 | -1.97607400 | -1.27313100 |
| C  | -1.26571800 | -1.13943000 | -2.25543000 |
| C  | -2.30050900 | -0.39741900 | -1.57889100 |
| C  | -1.22201800 | -1.74626100 | -0.00752700 |
| C  | -2.24551100 | -0.73466800 | -0.17635100 |
| Ir | -0.37259700 | 0.30700500  | -0.77538300 |
| C  | -1.02252400 | -1.15745700 | -3.72682500 |
| H  | -1.68346900 | -1.88266300 | -4.21749600 |

|   |             |             |             |
|---|-------------|-------------|-------------|
| H | -1.20214800 | -0.17668200 | -4.17790800 |
| H | 0.00670100  | -1.44656100 | -3.96287700 |
| C | 0.51631800  | -2.90934300 | -1.53216700 |
| H | 1.20542300  | -2.94701300 | -0.68130000 |
| H | 0.14729500  | -3.92812500 | -1.70321300 |
| H | 1.09155100  | -2.61670500 | -2.41615400 |
| C | -0.88867200 | -2.44554500 | 1.26226200  |
| H | -1.12281900 | -1.84484100 | 2.14764200  |
| H | -1.46675500 | -3.37553800 | 1.33440500  |
| H | 0.17195500  | -2.71311500 | 1.31206500  |
| C | -3.24496900 | -0.30853100 | 0.84627700  |
| H | -3.44997400 | 0.76563800  | 0.79216600  |
| H | -4.19404900 | -0.83449300 | 0.68238400  |
| H | -2.92160700 | -0.53983100 | 1.86612300  |
| C | -3.33265000 | 0.46841700  | -2.21384700 |
| H | -2.98028600 | 0.88806600  | -3.16066800 |
| H | -4.23590700 | -0.11847900 | -2.42318300 |
| H | -3.61949400 | 1.29664700  | -1.55865400 |
| C | 3.79418800  | 0.70667600  | -0.67779000 |
| C | 3.74325600  | 0.63945300  | -2.05483700 |
| C | 2.38425600  | 0.52602500  | -2.37234300 |
| N | 1.65838900  | 0.52210800  | -1.25416200 |
| H | 4.63113800  | 0.80526900  | -0.00024800 |
| H | 4.57782000  | 0.67238000  | -2.73957400 |
| H | 1.89408900  | 0.45342200  | -3.33548400 |
| N | 2.52345200  | 0.63190200  | -0.21842300 |
| C | 0.54258900  | 0.60633300  | 1.06824700  |
| C | 1.94296600  | 0.65405400  | 1.06669300  |
| C | -0.08872100 | 0.63867500  | 2.29937000  |
| C | 2.69773100  | 0.69980600  | 2.23276100  |
| C | 0.63882000  | 0.65445400  | 3.49117600  |
| H | -1.17320300 | 0.62643400  | 2.37432600  |
| C | 2.03340200  | 0.68865900  | 3.45412200  |
| H | 3.78445900  | 0.71559100  | 2.19855800  |
| H | 2.62152800  | 0.65986700  | 4.36944100  |
| C | -0.16146700 | 0.51365900  | 4.74591200  |
| O | -1.24543400 | -0.01350100 | 4.74510700  |
| O | 0.38256000  | 0.97678500  | 5.88108600  |
| H | -0.72793700 | 1.79299200  | -0.32876800 |
| H | -0.44763200 | 1.42848500  | -1.90606400 |
| H | 1.16542100  | 1.51325900  | 5.70576600  |
| O | -0.33964000 | 2.64446800  | -3.65765700 |
| H | 0.40536600  | 3.25343600  | -3.65730100 |
| H | -1.10327200 | 3.19651900  | -3.85283200 |

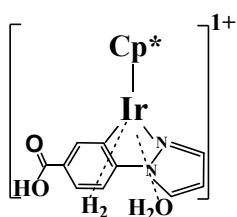

TS<sub>12-13</sub>

52 -103.60i cm<sup>-1</sup>

E=-1216.759876(au)

|    |             |             |             |
|----|-------------|-------------|-------------|
| C  | -0.79659900 | -2.11022500 | -1.07578200 |
| C  | -1.17280800 | -1.30036500 | -2.23070300 |
| C  | -2.12601100 | -0.36199700 | -1.79393000 |
| C  | -1.64068000 | -1.72487000 | 0.05013200  |
| C  | -2.39570800 | -0.59546400 | -0.36853300 |
| Ir | -0.26080400 | -0.14154300 | -0.51309900 |
| C  | -0.58818000 | -1.42859600 | -3.59365400 |
| H  | -1.08847500 | -2.22430400 | -4.15909900 |
| H  | -0.69180700 | -0.49882800 | -4.16242300 |
| H  | 0.47697000  | -1.68292400 | -3.54867600 |
| C  | 0.13701100  | -3.26413100 | -1.09049400 |
| H  | 0.58890800  | -3.42094400 | -0.10629300 |
| H  | -0.40217900 | -4.18136300 | -1.36348400 |
| H  | 0.94266400  | -3.12171100 | -1.81744100 |
| C  | -1.71269500 | -2.44260600 | 1.35049800  |
| H  | -2.18048000 | -1.83846500 | 2.13312400  |
| H  | -2.31853900 | -3.35020500 | 1.23466500  |
| H  | -0.72434000 | -2.74859100 | 1.70830600  |
| C  | -3.37907200 | 0.17528800  | 0.43953400  |
| H  | -3.30588300 | 1.24914100  | 0.23796700  |
| H  | -4.40374900 | -0.13697800 | 0.20023100  |
| H  | -3.22563300 | 0.02794900  | 1.51252700  |
| C  | -2.78044100 | 0.69323700  | -2.60800600 |
| H  | -2.18848600 | 0.94127300  | -3.49287700 |
| H  | -3.76822400 | 0.34759300  | -2.94013200 |
| H  | -2.93226700 | 1.61202900  | -2.03229000 |
| C  | 3.61345400  | 1.35629800  | -0.83592000 |
| C  | 3.43692900  | 1.31051000  | -2.20716200 |
| C  | 2.14797500  | 0.80382000  | -2.39293900 |
| N  | 1.57692500  | 0.56121300  | -1.21070900 |
| H  | 4.46011000  | 1.67481200  | -0.24311700 |
| H  | 4.15183000  | 1.59496500  | -2.96514700 |
| H  | 1.59029800  | 0.62101400  | -3.30281300 |
| N  | 2.48124600  | 0.90203200  | -0.26062400 |

|   |             |             |             |
|---|-------------|-------------|-------------|
| C | 0.76185000  | 0.22517200  | 1.23364500  |
| C | 2.06497000  | 0.73566900  | 1.08477400  |
| C | 0.31362900  | 0.07203200  | 2.54169000  |
| C | 2.89156900  | 1.05867900  | 2.15038000  |
| C | 1.10426200  | 0.41312600  | 3.64288300  |
| H | -0.67825400 | -0.32280500 | 2.75212200  |
| C | 2.39927300  | 0.89159700  | 3.44029200  |
| H | 3.90281700  | 1.42758200  | 1.99604200  |
| H | 3.05889800  | 1.10583400  | 4.27938400  |
| C | 0.50666400  | 0.17997800  | 4.99525900  |
| O | -0.43027500 | -0.55702400 | 5.16283200  |
| O | 1.06262200  | 0.83136800  | 6.03040000  |
| H | -0.66534700 | 2.43722700  | -0.00382100 |
| H | -0.55508000 | 2.53878200  | -0.74140700 |
| H | 1.68347700  | 1.50766100  | 5.73436900  |
| O | -0.18252100 | 2.64711900  | -3.21659500 |
| H | 0.59365000  | 3.20970900  | -3.13253200 |
| H | -0.83893200 | 3.20927600  | -3.64000600 |

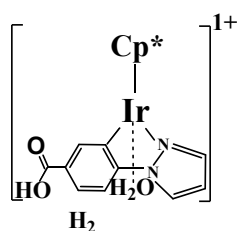

13

52

E=-1216.761384(au)

|    |             |             |             |
|----|-------------|-------------|-------------|
| C  | -1.12857700 | -1.88182400 | 2.59710600  |
| C  | -1.54280500 | -1.17469900 | 1.38189400  |
| C  | -2.55640000 | -0.26568500 | 1.73738900  |
| C  | -2.01758600 | -1.47589400 | 3.66992000  |
| C  | -2.83062400 | -0.41327800 | 3.16937900  |
| Ir | -0.72188800 | 0.15848100  | 3.02110300  |
| C  | -0.95884400 | -1.39406800 | 0.03022800  |
| H  | -1.48486500 | -2.20759000 | -0.48488100 |
| H  | -1.03581300 | -0.50258400 | -0.60110200 |
| H  | 0.09607500  | -1.68353300 | 0.08765900  |
| C  | -0.13921200 | -2.99274700 | 2.65745500  |
| H  | 0.25194500  | -3.11921400 | 3.67180700  |
| H  | -0.59747900 | -3.94200500 | 2.35155300  |
| H  | 0.71307200  | -2.80492100 | 1.99570800  |
| C  | -2.07111900 | -2.09291500 | 5.02161600  |
| H  | -2.55938000 | -1.44878800 | 5.75880300  |
| H  | -2.64633600 | -3.02598300 | 4.97081000  |

|   |             |             |             |
|---|-------------|-------------|-------------|
| H | -1.07367100 | -2.33737600 | 5.40017700  |
| C | -3.89955900 | 0.32576700  | 3.89520700  |
| H | -3.94567600 | 1.37140200  | 3.57062500  |
| H | -4.88113100 | -0.12463600 | 3.69890800  |
| H | -3.74031700 | 0.31903800  | 4.97777400  |
| C | -3.24478600 | 0.72111400  | 0.86299600  |
| H | -2.76009700 | 0.81647000  | -0.11275400 |
| H | -4.28543500 | 0.41872500  | 0.69031000  |
| H | -3.26883600 | 1.71246200  | 1.33004700  |
| C | 3.39748100  | 0.92539200  | 2.78835900  |
| C | 3.26096700  | 0.86813900  | 1.41610900  |
| C | 1.89953400  | 0.63154800  | 1.19403300  |
| N | 1.24906400  | 0.55123400  | 2.35726400  |
| H | 4.26977500  | 1.08752600  | 3.40658400  |
| H | 4.04061500  | 0.97983000  | 0.67708500  |
| H | 1.35939500  | 0.51122600  | 0.26280400  |
| N | 2.17406800  | 0.73420500  | 3.33079400  |
| C | 0.31519300  | 0.44885100  | 4.78051800  |
| C | 1.69431700  | 0.69747800  | 4.66315200  |
| C | -0.19261500 | 0.44346100  | 6.07513800  |
| C | 2.53675300  | 0.89017500  | 5.75061700  |
| C | 0.61896800  | 0.64497000  | 7.19626000  |
| H | -1.25132700 | 0.27112600  | 6.25878200  |
| C | 1.98858800  | 0.85368600  | 7.02758200  |
| H | 3.60406700  | 1.05335200  | 5.61994400  |
| H | 2.65699800  | 0.95515100  | 7.88079200  |
| H | -2.70872800 | 2.75306900  | 5.92849800  |
| C | -0.05924900 | 0.55700300  | 8.52840000  |
| O | -1.14001300 | 0.04279900  | 8.66025200  |
| O | 0.58732700  | 1.07571400  | 9.58463100  |
| O | -0.90943700 | 2.47333300  | 3.04796900  |
| H | -0.68039100 | 2.79081000  | 3.93398500  |
| H | -0.28971200 | 2.89652400  | 2.43868600  |
| H | -2.61114000 | 2.86450300  | 5.19784000  |
| H | 1.36372400  | 1.58142600  | 9.31666900  |

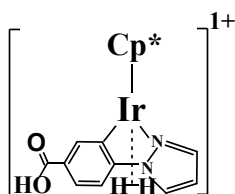

14

49

**E=-1140.326979(au)**

|   |             |             |             |
|---|-------------|-------------|-------------|
| C | -0.60749900 | -1.86246200 | -1.01836900 |
|---|-------------|-------------|-------------|



|    |             |             |             |
|----|-------------|-------------|-------------|
| C  | -1.08095200 | -1.25194600 | -2.26208400 |
| C  | -2.21930000 | -0.47165000 | -1.96207200 |
| C  | -1.56000700 | -1.54008400 | 0.01634500  |
| C  | -2.48834100 | -0.59821100 | -0.53075100 |
| Ir | -0.45528900 | 0.27457000  | -0.69738100 |
| C  | -0.45757000 | -1.45919400 | -3.59668400 |
| H  | -0.82932800 | -2.39015000 | -4.04297600 |
| H  | -0.69044600 | -0.64603200 | -4.29116000 |
| H  | 0.63097000  | -1.55104400 | -3.52391400 |
| C  | 0.51654800  | -2.83234900 | -0.89412400 |
| H  | 0.93408900  | -2.82269300 | 0.11820800  |
| H  | 0.18022000  | -3.85465600 | -1.10799700 |
| H  | 1.32771200  | -2.59817000 | -1.59163900 |
| C  | -1.58174900 | -2.12563100 | 1.38203500  |
| H  | -2.15437100 | -1.52535700 | 2.09459400  |
| H  | -2.05825500 | -3.11331600 | 1.33151600  |
| H  | -0.57731100 | -2.26535200 | 1.79248500  |
| C  | -3.65629700 | -0.00196200 | 0.17699500  |
| H  | -3.91030400 | 0.98402900  | -0.22441100 |
| H  | -4.54055500 | -0.64180700 | 0.06513000  |
| H  | -3.46314100 | 0.11472800  | 1.24768600  |
| C  | -3.04593700 | 0.32101900  | -2.91434800 |
| H  | -2.48722500 | 0.59115200  | -3.81508700 |
| H  | -3.92351700 | -0.25843400 | -3.22768000 |
| H  | -3.41409000 | 1.24597800  | -2.45918800 |
| C  | 3.66438900  | 0.98475900  | -1.04041100 |
| C  | 3.45781500  | 1.09206100  | -2.40052800 |
| C  | 2.08110100  | 0.91626900  | -2.57848600 |
| N  | 1.49065400  | 0.71037200  | -1.40045600 |
| H  | 4.56884300  | 1.06196800  | -0.45319000 |
| H  | 4.20219900  | 1.27641600  | -3.16095700 |
| H  | 1.49116000  | 0.93376900  | -3.48636900 |
| N  | 2.46503400  | 0.75391300  | -0.46032400 |
| C  | 0.65793200  | 0.46483400  | 1.04433200  |
| C  | 2.04203900  | 0.61977600  | 0.88156900  |
| C  | 0.18791300  | 0.37464700  | 2.34493100  |
| C  | 2.93239700  | 0.64602400  | 1.94812900  |
| C  | 1.05360100  | 0.39295500  | 3.44202400  |
| H  | -0.87511100 | 0.27265800  | 2.55224500  |
| C  | 2.42786900  | 0.52190500  | 3.23738000  |
| H  | 4.00355600  | 0.74303600  | 1.78759900  |
| H  | 3.12731800  | 0.48772900  | 4.07061800  |
| C  | 0.42385800  | 0.17507600  | 4.78186600  |
| O  | -0.64542400 | -0.36695000 | 4.89820700  |

|   |             |            |             |
|---|-------------|------------|-------------|
| O | 1.10739700  | 0.59440300 | 5.85776200  |
| H | -0.82629000 | 1.92474900 | -0.17765900 |
| H | -0.72975000 | 1.99391800 | -1.03434500 |
| H | 1.85743700  | 1.14804500 | 5.60869700  |

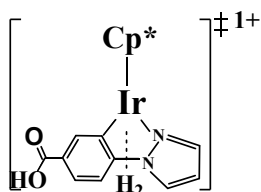

TS<sub>14-15</sub>

49 -161.72i cm<sup>-1</sup>

E=-1140.32429(au)

|    |             |             |             |
|----|-------------|-------------|-------------|
| C  | -0.74962900 | -2.10988000 | -1.01517500 |
| C  | -1.12760000 | -1.36980100 | -2.21946000 |
| C  | -2.10634400 | -0.42950000 | -1.84931600 |
| C  | -1.62787600 | -1.68972500 | 0.06999600  |
| C  | -2.39620900 | -0.59685000 | -0.41830400 |
| Ir | -0.26032900 | -0.10787400 | -0.54939500 |
| C  | -0.53821100 | -1.58488200 | -3.56887000 |
| H  | -1.05511000 | -2.40210100 | -4.08721100 |
| H  | -0.62160600 | -0.69352500 | -4.19902900 |
| H  | 0.51971100  | -1.86223100 | -3.50591800 |
| C  | 0.20308300  | -3.24802400 | -0.96212900 |
| H  | 0.59614400  | -3.39089900 | 0.04890900  |
| H  | -0.29832600 | -4.17741200 | -1.26386600 |
| H  | 1.05151400  | -3.09192600 | -1.63589700 |
| C  | -1.71582700 | -2.34566400 | 1.40151200  |
| H  | -2.22987900 | -1.72434800 | 2.14023000  |
| H  | -2.28541900 | -3.27903600 | 1.30851600  |
| H  | -0.72946400 | -2.59931000 | 1.80320000  |
| C  | -3.41630600 | 0.18224600  | 0.33516800  |
| H  | -3.43361000 | 1.23152200  | 0.02230400  |
| H  | -4.41871800 | -0.22969200 | 0.16118300  |
| H  | -3.22905700 | 0.15914000  | 1.41291100  |
| C  | -2.76119700 | 0.57762200  | -2.72527700 |
| H  | -2.16710300 | 0.79357000  | -3.61805900 |
| H  | -3.73983100 | 0.20899600  | -3.05897300 |
| H  | -2.93531200 | 1.52180700  | -2.19929300 |
| C  | 3.68822700  | 1.21481000  | -0.85657200 |
| C  | 3.52187500  | 1.17205500  | -2.22782000 |
| C  | 2.21419000  | 0.72178700  | -2.42210800 |
| N  | 1.62124900  | 0.50529900  | -1.24430600 |
| H  | 4.54146200  | 1.50231700  | -0.25751400 |
| H  | 4.25091500  | 1.42956800  | -2.98168600 |

|   |             |             |             |
|---|-------------|-------------|-------------|
| H | 1.67028600  | 0.54809100  | -3.34230200 |
| N | 2.53264400  | 0.81065100  | -0.28861800 |
| C | 0.77200800  | 0.23720900  | 1.19908300  |
| C | 2.10180500  | 0.67158100  | 1.05415100  |
| C | 0.30659800  | 0.11905400  | 2.50357400  |
| C | 2.93985300  | 0.94861300  | 2.12444400  |
| C | 1.11097300  | 0.41266400  | 3.60847900  |
| H | -0.70926100 | -0.21063100 | 2.71016200  |
| C | 2.43329900  | 0.81240100  | 3.41230000  |
| H | 3.97198600  | 1.25590400  | 1.97394500  |
| H | 3.10105000  | 0.98743100  | 4.25395300  |
| C | 0.49294700  | 0.20591800  | 4.95624900  |
| O | -0.48124200 | -0.48419700 | 5.11203700  |
| O | 1.07370700  | 0.82185500  | 5.99843200  |
| H | -0.64803300 | 2.27394900  | -0.08046700 |
| H | -0.53210500 | 2.38503000  | -0.81836700 |
| H | 1.73181700  | 1.46628200  | 5.71175900  |

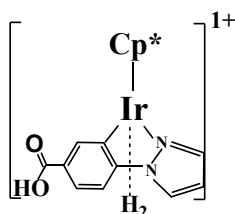

15

49

**E=-1140.320498(au)**

|    |             |             |             |
|----|-------------|-------------|-------------|
| C  | -1.20134700 | -2.07120400 | -1.18377200 |
| C  | -1.36785800 | -1.23306400 | -2.35154700 |
| C  | -2.06988600 | -0.07633900 | -1.93780900 |
| C  | -1.90911100 | -1.47867000 | -0.06293600 |
| C  | -2.40579200 | -0.22010900 | -0.51190200 |
| Ir | -0.25307000 | -0.19242200 | -0.66866700 |
| C  | -0.83620400 | -1.53899600 | -3.70860000 |
| H  | -1.47719400 | -2.26558800 | -4.22254200 |
| H  | -0.79137800 | -0.64473200 | -4.33797700 |
| H  | 0.17034200  | -1.96991100 | -3.65960600 |
| C  | -0.50992800 | -3.38254400 | -1.14764000 |
| H  | -0.06720300 | -3.57397400 | -0.16521600 |
| H  | -1.23269000 | -4.18582800 | -1.34677400 |
| H  | 0.27951000  | -3.45131500 | -1.90174600 |
| C  | -2.10770200 | -2.12934800 | 1.26106200  |
| H  | -2.48562300 | -1.42915500 | 2.01155300  |
| H  | -2.83987400 | -2.94162000 | 1.17496400  |
| H  | -1.17660000 | -2.55981100 | 1.64504500  |

|   |             |             |             |
|---|-------------|-------------|-------------|
| C | -3.19035700 | 0.77004700  | 0.27025300  |
| H | -2.88629400 | 1.79520400  | 0.03183000  |
| H | -4.25934100 | 0.67774200  | 0.03858200  |
| H | -3.06494600 | 0.62718800  | 1.34723100  |
| C | -2.43099400 | 1.10320100  | -2.76587900 |
| H | -1.80582700 | 1.17918700  | -3.66079600 |
| H | -3.47656500 | 1.03483600  | -3.09307000 |
| H | -2.32567600 | 2.03509600  | -2.20036600 |
| C | 3.31676300  | 1.87989000  | -1.07955700 |
| C | 3.13429400  | 1.77977200  | -2.44857300 |
| C | 1.96396000  | 1.03807300  | -2.60361500 |
| N | 1.46636900  | 0.70365300  | -1.40662200 |
| H | 4.09220900  | 2.37040900  | -0.50671500 |
| H | 3.76780500  | 2.18856200  | -3.22163300 |
| H | 1.45094600  | 0.72578200  | -3.50506200 |
| N | 2.30559900  | 1.22460700  | -0.47853000 |
| C | 0.70467100  | 0.36627000  | 1.05496300  |
| C | 1.93532700  | 1.02834300  | 0.87751500  |
| C | 0.30093200  | 0.17057700  | 2.37329400  |
| C | 2.73786000  | 1.45320300  | 1.92405100  |
| C | 1.06838900  | 0.60424300  | 3.45739400  |
| H | -0.63197600 | -0.34033500 | 2.60289000  |
| C | 2.29248700  | 1.23230900  | 3.22412700  |
| H | 3.69784100  | 1.93388600  | 1.75133800  |
| H | 2.94034900  | 1.52641800  | 4.04808300  |
| C | 0.52969300  | 0.30336300  | 4.82237100  |
| O | -0.33020500 | -0.51974200 | 5.00017900  |
| O | 1.04763800  | 0.99007800  | 5.85315600  |
| H | 0.13860100  | 3.26924300  | -0.63889500 |
| H | 0.25623000  | 3.39134500  | -1.36578100 |
| H | 1.59498600  | 1.72722300  | 5.55770600  |

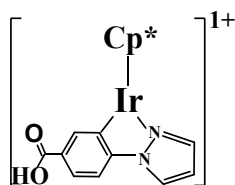

16

47

**E=-1139.148791(au)**

|   |             |             |             |
|---|-------------|-------------|-------------|
| C | -1.16707700 | -2.03426500 | -1.19307200 |
| C | -1.37502300 | -1.19466100 | -2.35449500 |
| C | -2.11772700 | -0.07019100 | -1.92840600 |
| C | -1.89165100 | -1.47595600 | -0.06410100 |
| C | -2.43770600 | -0.23511400 | -0.50189100 |

|    |             |             |             |
|----|-------------|-------------|-------------|
| Ir | -0.27990600 | -0.13586000 | -0.66817700 |
| C  | -0.84255000 | -1.47169000 | -3.71727300 |
| H  | -1.45779100 | -2.22108500 | -4.22991900 |
| H  | -0.83759100 | -0.57289200 | -4.34183500 |
| H  | 0.18061600  | -1.86258000 | -3.67858900 |
| C  | -0.42567200 | -3.31847100 | -1.17627400 |
| H  | -0.01209800 | -3.52920100 | -0.18541000 |
| H  | -1.10505300 | -4.14228400 | -1.43498800 |
| H  | 0.39427800  | -3.32471400 | -1.90078800 |
| C  | -2.06159000 | -2.14016000 | 1.25715600  |
| H  | -2.44918000 | -1.45412300 | 2.01578200  |
| H  | -2.77523600 | -2.96881400 | 1.17200500  |
| H  | -1.11742400 | -2.55027400 | 1.63113500  |
| C  | -3.26587000 | 0.71281300  | 0.28729900  |
| H  | -3.02171100 | 1.75259500  | 0.04594800  |
| H  | -4.33003600 | 0.56142400  | 0.06396500  |
| H  | -3.12632800 | 0.57740500  | 1.36343800  |
| C  | -2.53143600 | 1.09924200  | -2.74563700 |
| H  | -1.94030600 | 1.18527600  | -3.66222700 |
| H  | -3.58657000 | 1.00852400  | -3.03449500 |
| H  | -2.42591400 | 2.03442800  | -2.18560400 |
| C  | 3.40275700  | 1.73870400  | -1.07547300 |
| C  | 3.21751100  | 1.64888800  | -2.44462400 |
| C  | 1.98282800  | 1.02069400  | -2.60177900 |
| N  | 1.44931300  | 0.74342000  | -1.40568300 |
| H  | 4.21956400  | 2.15527000  | -0.50160300 |
| H  | 3.88860700  | 1.99459800  | -3.21672800 |
| H  | 1.44594400  | 0.75271800  | -3.50355400 |
| N  | 2.32929900  | 1.18945800  | -0.47565400 |
| C  | 0.69130700  | 0.39697900  | 1.05432400  |
| C  | 1.94603600  | 1.01290500  | 0.87942900  |
| C  | 0.27416400  | 0.22399500  | 2.37160200  |
| C  | 2.75755600  | 1.41556000  | 1.92783200  |
| C  | 1.04974300  | 0.63909300  | 3.45686100  |
| H  | -0.67681600 | -0.25306800 | 2.59942900  |
| C  | 2.29724700  | 1.22056700  | 3.22671300  |
| H  | 3.73359600  | 1.86362700  | 1.75764500  |
| H  | 2.94948000  | 1.49790700  | 4.05301100  |
| C  | 0.49288100  | 0.36970800  | 4.82093400  |
| O  | -0.38988500 | -0.42799400 | 5.00252600  |
| O  | 1.02170900  | 1.05591500  | 5.84662000  |
| H  | 1.58804000  | 1.77613900  | 5.54506200  |

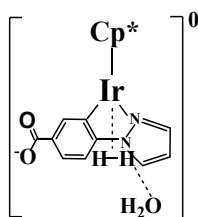

17

51

**E=-1216.301109(au)**

|    |             |             |             |
|----|-------------|-------------|-------------|
| C  | -0.99744300 | -1.74069500 | 2.65040300  |
| C  | -1.68149000 | -1.06350800 | 1.54998300  |
| C  | -2.76416100 | -0.34574400 | 2.11681700  |
| C  | -1.73686200 | -1.51820200 | 3.86055800  |
| C  | -2.78032400 | -0.57715700 | 3.55764200  |
| Ir | -0.86287800 | 0.41291000  | 3.05952800  |
| C  | -1.31762300 | -1.14620200 | 0.10653000  |
| H  | -1.85227700 | -1.96489500 | -0.39289100 |
| H  | -1.55776500 | -0.21644600 | -0.42107800 |
| H  | -0.24631100 | -1.33394700 | -0.02591200 |
| C  | 0.19417900  | -2.62503800 | 2.51201500  |
| H  | 0.74932300  | -2.68868300 | 3.45396700  |
| H  | -0.10330000 | -3.64287300 | 2.22965300  |
| H  | 0.88390300  | -2.25331300 | 1.74609200  |
| C  | -1.44916000 | -2.13528600 | 5.18472000  |
| H  | -1.80239400 | -1.54720800 | 6.04278700  |
| H  | -1.93031200 | -3.12152300 | 5.22722700  |
| H  | -0.37352300 | -2.28457100 | 5.33180500  |
| C  | -3.83198200 | -0.10683800 | 4.50574100  |
| H  | -4.13226600 | 0.92459300  | 4.29238700  |
| H  | -4.72790200 | -0.73673000 | 4.42909100  |
| H  | -3.48953800 | -0.14667800 | 5.54613900  |
| C  | -3.74716400 | 0.50251900  | 1.38689700  |
| H  | -3.32856500 | 0.89613300  | 0.45511800  |
| H  | -4.64402400 | -0.07938600 | 1.13828900  |
| H  | -4.06959200 | 1.35224500  | 1.99809400  |
| C  | 3.30166700  | 0.78365500  | 3.09173600  |
| C  | 3.24686000  | 0.76738200  | 1.70649000  |
| C  | 1.88744600  | 0.70769800  | 1.39549600  |
| N  | 1.16298800  | 0.69280000  | 2.52161900  |
| H  | 4.13864000  | 0.83186800  | 3.77469800  |
| H  | 4.08134600  | 0.79530800  | 1.02123800  |
| H  | 1.38698400  | 0.67081900  | 0.43460600  |
| N  | 2.03722400  | 0.73524100  | 3.55360800  |
| C  | 0.07322900  | 0.75124600  | 4.86323100  |

|   |             |             |            |
|---|-------------|-------------|------------|
| C | 1.46976200  | 0.72244200  | 4.85682500 |
| C | -0.57179900 | 0.70588400  | 6.08226100 |
| C | 2.21664600  | 0.62867700  | 6.03087800 |
| C | 0.13318000  | 0.50329400  | 7.26442200 |
| H | -1.65586400 | 0.70128800  | 6.17209700 |
| C | 1.52936900  | 0.50712000  | 7.23537800 |
| H | 3.30607700  | 0.60897200  | 6.00182900 |
| H | 2.04673900  | 0.37402400  | 8.18337500 |
| H | -1.16016900 | 2.11010100  | 3.33835400 |
| C | -0.67712100 | 0.10144900  | 8.52064800 |
| O | -1.85570600 | -0.23993800 | 8.25279600 |
| O | -0.04457400 | 0.12366900  | 9.58635800 |
| O | -0.76880900 | 2.93338200  | 0.51643700 |
| H | 0.15419500  | 3.18405300  | 0.62334000 |
| H | -1.21638000 | 3.74635900  | 0.26278900 |
| H | -1.06075600 | 2.04733900  | 2.46823500 |

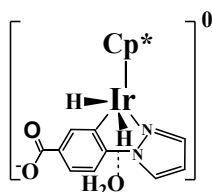

17'

51

E=-1216.291045(au)

|    |             |             |             |
|----|-------------|-------------|-------------|
| C  | -0.55003700 | -1.91574900 | -1.03496500 |
| C  | -1.29783900 | -1.23111400 | -2.05870500 |
| C  | -2.34862400 | -0.48609500 | -1.39993900 |
| C  | -1.12274100 | -1.61429700 | 0.23407900  |
| C  | -2.21755500 | -0.69494000 | 0.02277100  |
| Ir | -0.44292900 | 0.42305500  | -0.80041800 |
| C  | -1.11156200 | -1.38108300 | -3.53134400 |
| H  | -1.65513700 | -2.25757500 | -3.90686000 |
| H  | -1.47158100 | -0.50083600 | -4.07258300 |
| H  | -0.05578200 | -1.51149000 | -3.79169100 |
| C  | 0.64920200  | -2.77436500 | -1.24123300 |
| H  | 1.39503700  | -2.59737200 | -0.45684600 |
| H  | 0.38226300  | -3.83812400 | -1.20514200 |
| H  | 1.12575900  | -2.58189700 | -2.20782500 |
| C  | -0.67695700 | -2.17658000 | 1.53810500  |
| H  | -1.05449500 | -1.62384900 | 2.41078700  |
| H  | -1.02259300 | -3.21637400 | 1.61573400  |
| H  | 0.41757700  | -2.19190500 | 1.60977200  |
| C  | -3.19138300 | -0.23782200 | 1.05793500  |
| H  | -3.47494900 | 0.80925900  | 0.90466100  |

|   |             |             |             |
|---|-------------|-------------|-------------|
| H | -4.10643100 | -0.84105900 | 0.99010700  |
| H | -2.80185600 | -0.33720400 | 2.07904700  |
| C | -3.46804900 | 0.24665200  | -2.05766300 |
| H | -3.17616500 | 0.63544700  | -3.03833800 |
| H | -4.32960100 | -0.41898500 | -2.19741700 |
| H | -3.79616600 | 1.09229900  | -1.44541700 |
| C | 3.72343800  | 0.67858500  | -0.74657100 |
| C | 3.65762300  | 0.64259100  | -2.12980100 |
| C | 2.29577100  | 0.62818200  | -2.43875000 |
| N | 1.58156100  | 0.65503000  | -1.30677900 |
| H | 4.56557700  | 0.71199200  | -0.06918400 |
| H | 4.48786700  | 0.64203300  | -2.82058700 |
| H | 1.78390400  | 0.64654300  | -3.39407800 |
| N | 2.45985600  | 0.68292800  | -0.27797300 |
| C | 0.49320200  | 0.81899200  | 1.01400500  |
| C | 1.88756000  | 0.71989400  | 1.01549400  |
| C | -0.16744900 | 0.82912800  | 2.22245200  |
| C | 2.61514900  | 0.61327500  | 2.19882900  |
| C | 0.51600700  | 0.59078000  | 3.41171800  |
| H | -1.24903100 | 0.88303300  | 2.28738900  |
| C | 1.91004900  | 0.53392500  | 3.39748400  |
| H | 3.70252300  | 0.54486400  | 2.18067200  |
| H | 2.41322400  | 0.38148600  | 4.35028500  |
| C | -0.32073500 | 0.16725100  | 4.64053300  |
| O | -1.47284400 | -0.23034800 | 4.32425100  |
| O | 0.26502500  | 0.21024700  | 5.72917000  |
| H | -0.80673900 | 1.91321300  | -0.38208900 |
| H | -0.61606000 | 1.38362500  | -2.05786900 |
| O | 0.26227800  | 2.27182200  | -4.14150600 |
| H | 0.50114700  | 2.86471500  | -3.42173800 |
| H | -0.17374800 | 2.83155500  | -4.79010200 |

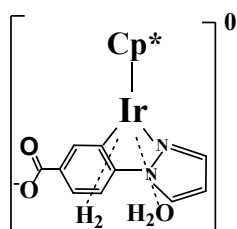

TS<sub>17-18</sub>

51 -182.70i cm<sup>-1</sup>

E=-1216.302227(au)

|   |             |             |             |
|---|-------------|-------------|-------------|
| C | -0.69592600 | -1.97239000 | -1.19117500 |
| C | -1.26603300 | -1.17766200 | -2.27570300 |
| C | -2.24517200 | -0.34228800 | -1.70870400 |
| C | -1.46223400 | -1.70913400 | 0.02461100  |



|    |             |             |             |
|----|-------------|-------------|-------------|
| C  | -2.35534100 | -0.63747700 | -0.27478600 |
| Ir | -0.28961000 | 0.00771400  | -0.57858100 |
| C  | -0.83917200 | -1.20156700 | -3.70371700 |
| H  | -1.55886900 | -1.75346400 | -4.32150000 |
| H  | -0.75370700 | -0.18742300 | -4.10989200 |
| H  | 0.13080600  | -1.69635900 | -3.82148400 |
| C  | 0.34873100  | -3.02107700 | -1.34170300 |
| H  | 0.86420600  | -3.19959400 | -0.39329200 |
| H  | -0.09624100 | -3.96911800 | -1.67156800 |
| H  | 1.10373300  | -2.72799100 | -2.07931700 |
| C  | -1.33295300 | -2.45211400 | 1.30685100  |
| H  | -1.63132800 | -1.85554800 | 2.17460800  |
| H  | -1.96579100 | -3.34858100 | 1.27699000  |
| H  | -0.30124200 | -2.77236100 | 1.48255800  |
| C  | -3.33811800 | -0.01366700 | 0.65534900  |
| H  | -3.44883500 | 1.05822700  | 0.45806400  |
| H  | -4.32771400 | -0.47612700 | 0.54516600  |
| H  | -3.03036200 | -0.12306600 | 1.69992800  |
| C  | -3.04931000 | 0.68882500  | -2.41625700 |
| H  | -2.54844700 | 1.03907100  | -3.32276300 |
| H  | -4.02873700 | 0.27767300  | -2.69507200 |
| H  | -3.23288200 | 1.55887700  | -1.77685700 |
| C  | 3.74693800  | 1.07004800  | -0.76080300 |
| C  | 3.65900000  | 0.93231600  | -2.13873700 |
| C  | 2.33251600  | 0.57900800  | -2.38313500 |
| N  | 1.65339200  | 0.51854700  | -1.22614900 |
| H  | 4.58165400  | 1.32372200  | -0.12200100 |
| H  | 4.45304400  | 1.06109500  | -2.85943700 |
| H  | 1.82638500  | 0.35997600  | -3.31658400 |
| N  | 2.53220800  | 0.81510200  | -0.24248700 |
| C  | 0.67967400  | 0.38174300  | 1.17507100  |
| C  | 2.02496200  | 0.77183700  | 1.08726000  |
| C  | 0.12523400  | 0.32601500  | 2.44686200  |
| C  | 2.79783200  | 1.08541300  | 2.19998400  |
| C  | 0.87048500  | 0.60713300  | 3.58908400  |
| H  | -0.91424700 | 0.06146600  | 2.63620400  |
| C  | 2.20521100  | 0.98934800  | 3.45643600  |
| H  | 3.83996100  | 1.38742000  | 2.09575200  |
| H  | 2.75191400  | 1.19863400  | 4.37376700  |
| C  | 0.19639600  | 0.43616100  | 4.97804500  |
| O  | -0.98337900 | 0.03077400  | 4.91629900  |
| O  | 0.93495700  | 0.71492200  | 5.93741300  |
| H  | -0.72503200 | 2.29413800  | -0.11667700 |
| H  | -0.62358700 | 2.39829000  | -0.86152400 |

|   |             |            |             |
|---|-------------|------------|-------------|
| O | -0.18753400 | 2.39949500 | -3.26978000 |
| H | 0.67264200  | 2.35579600 | -2.83700300 |
| H | -0.26902200 | 3.30860500 | -3.57263900 |

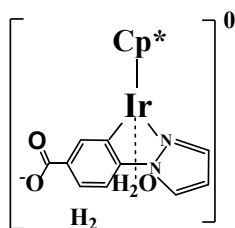

18

51

E=-1216.303975(au)

|    |             |             |             |
|----|-------------|-------------|-------------|
| C  | -1.10164800 | -1.93535700 | 2.42308100  |
| C  | -1.59582200 | -1.17078700 | 1.27247500  |
| C  | -2.58247100 | -0.28735200 | 1.73750600  |
| C  | -1.92489900 | -1.59571500 | 3.56870500  |
| C  | -2.76204200 | -0.50437100 | 3.17820500  |
| Ir | -0.67246700 | 0.07084100  | 2.96378800  |
| C  | -1.08774300 | -1.31463600 | -0.12025500 |
| H  | -1.61965100 | -2.11646600 | -0.64868500 |
| H  | -1.21510000 | -0.39348400 | -0.69871800 |
| H  | -0.02330000 | -1.57551900 | -0.13211700 |
| C  | -0.11206500 | -3.04674300 | 2.36059600  |
| H  | 0.31916900  | -3.24050700 | 3.34775000  |
| H  | -0.57967900 | -3.97473600 | 2.00561200  |
| H  | 0.71480900  | -2.80681400 | 1.68274300  |
| C  | -1.89102300 | -2.27236800 | 4.89297900  |
| H  | -2.31115100 | -1.64610000 | 5.68468900  |
| H  | -2.47915600 | -3.19808800 | 4.84923600  |
| H  | -0.86966500 | -2.53019800 | 5.18961700  |
| C  | -3.76183000 | 0.20544600  | 4.02603600  |
| H  | -3.87337200 | 1.24923600  | 3.71172300  |
| H  | -4.74949500 | -0.26839600 | 3.95293900  |
| H  | -3.46992400 | 0.21352000  | 5.08209700  |
| C  | -3.31935100 | 0.74865300  | 0.96351400  |
| H  | -2.95254000 | 0.82752600  | -0.06400900 |
| H  | -4.38996300 | 0.51029100  | 0.92233800  |
| H  | -3.22322900 | 1.73566100  | 1.43143000  |
| C  | 3.46071700  | 0.71286500  | 2.84382300  |
| C  | 3.36233300  | 0.66540100  | 1.46219500  |
| C  | 2.00108600  | 0.50339300  | 1.20068900  |
| N  | 1.31409500  | 0.45858200  | 2.34922800  |
| H  | 4.31564300  | 0.82779700  | 3.49591000  |
| H  | 4.16856500  | 0.73854800  | 0.74729900  |

|   |             |            |            |
|---|-------------|------------|------------|
| H | 1.47723600  | 0.42198500 | 0.25620500 |
| N | 2.21879500  | 0.58707100 | 3.34855100 |
| C | 0.31433500  | 0.33739900 | 4.73316000 |
| C | 1.68767400  | 0.60996400 | 4.66830100 |
| C | -0.30176200 | 0.50301200 | 5.96625600 |
| C | 2.44200000  | 0.96783000 | 5.78321100 |
| C | 0.40738800  | 0.91200800 | 7.09467700 |
| H | -1.37647000 | 0.38247200 | 6.10877200 |
| C | 1.78668000  | 1.10137900 | 7.00302100 |
| H | 3.50985600  | 1.16891100 | 5.69672200 |
| H | 2.30856200  | 1.39065100 | 7.91293500 |
| H | -2.12683900 | 2.57335200 | 6.57117300 |
| C | -0.37042300 | 1.22141900 | 8.39524100 |
| O | -1.61360100 | 1.28817200 | 8.22887900 |
| O | 0.33524100  | 1.38297400 | 9.40057900 |
| O | -0.90221800 | 2.36856500 | 3.24546500 |
| H | -1.10330100 | 2.43913500 | 4.19725800 |
| H | -0.03233600 | 2.78057500 | 3.14892200 |
| H | -2.26849500 | 2.92982700 | 5.91406900 |

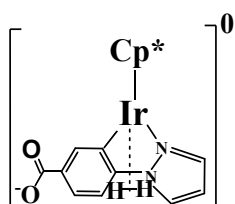

19

48

E=-1139.864877(au)

|    |             |             |             |
|----|-------------|-------------|-------------|
| C  | -0.46634300 | -1.89373100 | -0.94564400 |
| C  | -1.13159400 | -1.37282900 | -2.13787300 |
| C  | -2.22689900 | -0.59052700 | -1.68872400 |
| C  | -1.23543200 | -1.52713000 | 0.20982400  |
| C  | -2.26765300 | -0.63289200 | -0.23084900 |
| Ir | -0.33600400 | 0.29566200  | -0.82391900 |
| C  | -0.74857500 | -1.67112800 | -3.54735000 |
| H  | -1.16363700 | -2.63357900 | -3.87410400 |
| H  | -1.11420800 | -0.90181100 | -4.23526500 |
| H  | 0.33905800  | -1.73212600 | -3.66636900 |
| C  | 0.72276500  | -2.79232900 | -0.92823700 |
| H  | 1.36873400  | -2.56725300 | -0.07214200 |
| H  | 0.41522600  | -3.84253700 | -0.84705700 |
| H  | 1.32236600  | -2.68917200 | -1.83823400 |
| C  | -0.98449500 | -2.00041600 | 1.59769400  |
| H  | -1.35106700 | -1.32878800 | 2.38751700  |

|   |             |             |             |
|---|-------------|-------------|-------------|
| H | -1.47876800 | -2.97386700 | 1.72302800  |
| H | 0.08537300  | -2.15156300 | 1.78074100  |
| C | -3.33839900 | -0.04711100 | 0.62727700  |
| H | -3.62491600 | 0.95390400  | 0.28728000  |
| H | -4.23773000 | -0.67631200 | 0.59917500  |
| H | -3.02359600 | 0.02919500  | 1.67438800  |
| C | -3.22183500 | 0.13572000  | -2.52639700 |
| H | -2.84209200 | 0.34161500  | -3.53168800 |
| H | -4.13840100 | -0.45976900 | -2.62668400 |
| H | -3.50529700 | 1.08935700  | -2.06858600 |
| C | 3.83236700  | 0.62392400  | -0.73617800 |
| C | 3.80434300  | 0.49344100  | -2.11569600 |
| C | 2.45119000  | 0.41878200  | -2.44784900 |
| N | 1.70484400  | 0.49860700  | -1.34015500 |
| H | 4.65612000  | 0.72798800  | -0.04347900 |
| H | 4.65132400  | 0.46585700  | -2.78517000 |
| H | 1.97174500  | 0.31679600  | -3.41374200 |
| N | 2.55919400  | 0.62135000  | -0.29727600 |
| C | 0.57147200  | 0.80330100  | 0.96080100  |
| C | 1.96590200  | 0.73357200  | 0.98751100  |
| C | -0.10393800 | 0.88235700  | 2.16009200  |
| C | 2.68193500  | 0.71715900  | 2.18360000  |
| C | 0.56809800  | 0.75246600  | 3.37187500  |
| H | -1.18919400 | 0.91426500  | 2.21966400  |
| C | 1.96365300  | 0.71245000  | 3.37661200  |
| H | 3.77042500  | 0.66294800  | 2.18361200  |
| H | 2.45675600  | 0.63622300  | 4.34379100  |
| C | -0.28300400 | 0.44920800  | 4.62857100  |
| O | -1.45596200 | 0.09511900  | 4.34723000  |
| O | 0.31594800  | 0.53970200  | 5.70860000  |
| H | -0.63663800 | 2.00656200  | -0.67230300 |
| H | -0.49710900 | 1.87807300  | -1.53423200 |

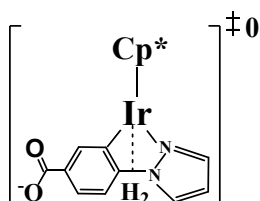

**TS<sub>19-20</sub>**

**48 -202.23i cm<sup>-1</sup>**

**E=-1139.865431 (au)**

|   |             |             |             |
|---|-------------|-------------|-------------|
| C | -0.66996800 | -2.10403300 | -1.08334600 |
| C | -1.21838900 | -1.39284300 | -2.23586900 |
| C | -2.20275600 | -0.51345600 | -1.74985600 |

|    |             |             |             |
|----|-------------|-------------|-------------|
| C  | -1.45929200 | -1.75159400 | 0.09314800  |
| C  | -2.33750800 | -0.70027600 | -0.30009700 |
| Ir | -0.25832900 | -0.08317200 | -0.61998100 |
| C  | -0.77060700 | -1.56514000 | -3.64628200 |
| H  | -1.36146000 | -2.33708100 | -4.15595400 |
| H  | -0.87110600 | -0.63874000 | -4.22219700 |
| H  | 0.27785300  | -1.87907300 | -3.69685500 |
| C  | 0.36383000  | -3.17168500 | -1.14374400 |
| H  | 0.83755800  | -3.31705600 | -0.16844200 |
| H  | -0.08346400 | -4.12674800 | -1.45000000 |
| H  | 1.15143100  | -2.92234800 | -1.86353800 |
| C  | -1.35693400 | -2.40878900 | 1.42425400  |
| H  | -1.71541200 | -1.78024700 | 2.24498400  |
| H  | -1.95174400 | -3.33152800 | 1.41865800  |
| H  | -0.32243700 | -2.67462200 | 1.66217700  |
| C  | -3.33037600 | -0.00000200 | 0.56217300  |
| H  | -3.40152600 | 1.06282300  | 0.30587400  |
| H  | -4.32936300 | -0.43949900 | 0.44332900  |
| H  | -3.05853200 | -0.06206800 | 1.62038400  |
| C  | -3.00054900 | 0.46621900  | -2.53554300 |
| H  | -2.53424100 | 0.69699700  | -3.49830900 |
| H  | -4.00387400 | 0.06711400  | -2.73488800 |
| H  | -3.13382000 | 1.40551100  | -1.98779000 |
| C  | 3.76332200  | 1.02125700  | -0.80176800 |
| C  | 3.67067100  | 0.89125600  | -2.17966800 |
| C  | 2.35318100  | 0.50362400  | -2.41820700 |
| N  | 1.68689300  | 0.40508300  | -1.26027600 |
| H  | 4.59199100  | 1.30201300  | -0.16635600 |
| H  | 4.45402300  | 1.05473500  | -2.90480200 |
| H  | 1.84412300  | 0.29598900  | -3.35121300 |
| N  | 2.56101500  | 0.72435400  | -0.27753800 |
| C  | 0.69235800  | 0.35022100  | 1.12812600  |
| C  | 2.04810300  | 0.70068600  | 1.04893200  |
| C  | 0.11677200  | 0.33189900  | 2.39032900  |
| C  | 2.81434100  | 1.00383800  | 2.16895800  |
| C  | 0.85621100  | 0.59606100  | 3.53932100  |
| H  | -0.93315900 | 0.10660400  | 2.56783500  |
| C  | 2.20357500  | 0.93510800  | 3.41965400  |
| H  | 3.86631600  | 1.27298100  | 2.07511200  |
| H  | 2.74799800  | 1.13201700  | 4.34106800  |
| C  | 0.15702600  | 0.43444300  | 4.91697300  |
| O  | -1.02714600 | 0.04370200  | 4.83437300  |
| O  | 0.88322300  | 0.69889100  | 5.88914600  |
| H  | -0.44722900 | 2.31261900  | -0.34278000 |

|   |             |            |             |
|---|-------------|------------|-------------|
| H | -0.55266800 | 2.20653300 | -1.08589500 |
|---|-------------|------------|-------------|

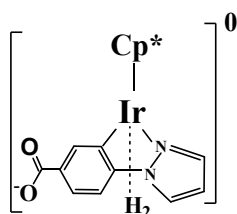

20

48

E=-1139.865558(au)

|    |             |             |             |
|----|-------------|-------------|-------------|
| C  | -1.15489100 | -2.08148200 | -1.40324800 |
| C  | -1.40173600 | -1.09377600 | -2.40514200 |
| C  | -2.05070600 | 0.00221100  | -1.75777800 |
| C  | -1.76781200 | -1.65476100 | -0.14514600 |
| C  | -2.32304800 | -0.36314900 | -0.36242300 |
| Ir | -0.18232800 | -0.25681500 | -0.65096700 |
| C  | -0.96643600 | -1.15110900 | -3.82966900 |
| H  | -1.70673800 | -1.66619800 | -4.45442700 |
| H  | -0.83187600 | -0.14619700 | -4.24567900 |
| H  | -0.01583900 | -1.68578300 | -3.93999600 |
| C  | -0.46549900 | -3.38474000 | -1.58625700 |
| H  | 0.13444800  | -3.63744000 | -0.70567100 |
| H  | -1.20297500 | -4.18730100 | -1.72352400 |
| H  | 0.19460200  | -3.38094200 | -2.45888500 |
| C  | -1.83455000 | -2.48299300 | 1.09030600  |
| H  | -2.13971500 | -1.89655000 | 1.96150600  |
| H  | -2.55764100 | -3.29903900 | 0.96307800  |
| H  | -0.86117400 | -2.92743900 | 1.32454600  |
| C  | -3.09113200 | 0.46832100  | 0.60421700  |
| H  | -2.85716600 | 1.53167400  | 0.48598400  |
| H  | -4.16967200 | 0.34022300  | 0.44506900  |
| H  | -2.86787100 | 0.20493500  | 1.64241900  |
| C  | -2.45528800 | 1.29055500  | -2.37853700 |
| H  | -1.84246700 | 1.52898500  | -3.25443400 |
| H  | -3.50477600 | 1.25467500  | -2.69991400 |
| H  | -2.35493400 | 2.11595600  | -1.66581600 |
| C  | 3.44745800  | 1.72929500  | -0.96624000 |
| C  | 3.37597100  | 1.51860300  | -2.33635700 |
| C  | 2.20312600  | 0.79108200  | -2.52584400 |
| N  | 1.60309900  | 0.56978400  | -1.34869300 |
| H  | 4.18071300  | 2.24824400  | -0.36400500 |
| H  | 4.08067600  | 1.84931600  | -3.08459800 |
| H  | 1.75604600  | 0.41103700  | -3.43608600 |
| N  | 2.37575800  | 1.14843600  | -0.40273700 |

|   |             |             |             |
|---|-------------|-------------|-------------|
| C | 0.64955800  | 0.40420700  | 1.05467900  |
| C | 1.89216500  | 1.06297000  | 0.93441100  |
| C | 0.11961200  | 0.30960600  | 2.34387400  |
| C | 2.57749400  | 1.59367300  | 2.01375900  |
| C | 0.76990900  | 0.83756000  | 3.45356100  |
| H | -0.83198600 | -0.17462700 | 2.55864800  |
| C | 1.99818800  | 1.47152000  | 3.28022400  |
| H | 3.53778600  | 2.09277600  | 1.88649100  |
| H | 2.47280600  | 1.86560200  | 4.17741300  |
| C | 0.10242300  | 0.72775100  | 4.84791800  |
| O | -1.01251900 | 0.16532200  | 4.82530600  |
| O | 0.77158100  | 1.21911900  | 5.77237100  |
| H | 0.48669900  | 3.35244200  | -0.83733700 |
| H | 0.38056100  | 3.24026100  | -1.56735600 |

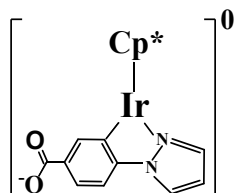

21

46

**E=-1138.694132(au)**

|    |             |             |             |
|----|-------------|-------------|-------------|
| C  | -1.11727800 | -2.03804400 | -1.40379100 |
| C  | -1.41555900 | -1.06540500 | -2.40946500 |
| C  | -2.10872200 | 0.00035400  | -1.76361900 |
| C  | -1.74272400 | -1.63259300 | -0.14391700 |
| C  | -2.35003100 | -0.36549600 | -0.36408600 |
| Ir | -0.21109700 | -0.18596400 | -0.66240000 |
| C  | -0.98583500 | -1.10788300 | -3.83626800 |
| H  | -1.72730500 | -1.61769300 | -4.46396100 |
| H  | -0.85177000 | -0.09887700 | -4.24274700 |
| H  | -0.03528700 | -1.64076300 | -3.95483000 |
| C  | -0.38032200 | -3.31444500 | -1.59036200 |
| H  | 0.22761700  | -3.54917700 | -0.71048600 |
| H  | -1.08766800 | -4.14278000 | -1.73279900 |
| H  | 0.28061500  | -3.28286700 | -2.46190800 |
| C  | -1.76893600 | -2.45714600 | 1.09553200  |
| H  | -2.05289500 | -1.87151900 | 1.97461800  |
| H  | -2.48896700 | -3.27892400 | 0.98947000  |
| H  | -0.78642000 | -2.89413000 | 1.30354600  |
| C  | -3.14899600 | 0.43982500  | 0.59953000  |
| H  | -2.93939800 | 1.50928000  | 0.49146400  |
| H  | -4.22212000 | 0.28730400  | 0.42599900  |
| H  | -2.93284300 | 0.17331200  | 1.63827400  |

|   |             |             |             |
|---|-------------|-------------|-------------|
| C | -2.59261500 | 1.25962800  | -2.38663400 |
| H | -2.03867000 | 1.50368000  | -3.29829900 |
| H | -3.65537600 | 1.17273200  | -2.65004800 |
| H | -2.49359300 | 2.10259200  | -1.69488600 |
| C | 3.52152500  | 1.61258400  | -0.94387700 |
| C | 3.45629500  | 1.39920900  | -2.31385500 |
| C | 2.23098000  | 0.76933900  | -2.52001500 |
| N | 1.59255600  | 0.60959100  | -1.35319600 |
| H | 4.28616800  | 2.07076400  | -0.33150000 |
| H | 4.19777600  | 1.66609700  | -3.05192300 |
| H | 1.76967400  | 0.42094200  | -3.43572500 |
| N | 2.39407200  | 1.13037200  | -0.39656900 |
| C | 0.62715600  | 0.45570400  | 1.04578900  |
| C | 1.89496900  | 1.06670800  | 0.93592000  |
| C | 0.08718500  | 0.37394700  | 2.33186300  |
| C | 2.59337500  | 1.56561200  | 2.02177700  |
| C | 0.75442000  | 0.86287400  | 3.44894200  |
| H | -0.88420600 | -0.07280800 | 2.53867100  |
| C | 2.00543100  | 1.45355100  | 3.28518400  |
| H | 3.57114600  | 2.03151600  | 1.90238800  |
| H | 2.49253900  | 1.81873800  | 4.18788000  |
| C | 0.08976000  | 0.74199400  | 4.84371300  |
| O | -1.03759400 | 0.20513700  | 4.81546600  |
| O | 0.77570400  | 1.19622200  | 5.77484800  |

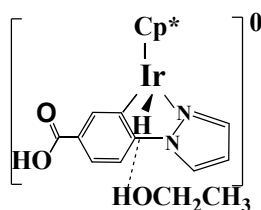

22

57

**E=-1294.886831(au)**

|    |             |             |             |
|----|-------------|-------------|-------------|
| C  | -0.80617800 | -2.26118600 | -1.23996400 |
| C  | -1.10932200 | -1.33176600 | -2.31398200 |
| C  | -2.10717500 | -0.42911100 | -1.87233800 |
| C  | -1.61844500 | -1.90783800 | -0.12512000 |
| C  | -2.38318200 | -0.72888700 | -0.47700000 |
| Ir | -0.28345800 | -0.14594100 | -0.52681800 |
| C  | -0.49550900 | -1.39221000 | -3.67207300 |
| H  | -1.00572900 | -2.13026700 | -4.30539900 |
| H  | -0.54490500 | -0.42403400 | -4.18295100 |
| H  | 0.55846100  | -1.69191700 | -3.61712200 |
| C  | 0.13857800  | -3.40981000 | -1.34477400 |



|   |             |             |             |
|---|-------------|-------------|-------------|
| H | 0.40920700  | -3.79551700 | -0.35649700 |
| H | -0.29460200 | -4.24088000 | -1.91876900 |
| H | 1.07001900  | -3.11697100 | -1.84565800 |
| C | -1.69741000 | -2.64126200 | 1.16948900  |
| H | -2.01123700 | -1.99102600 | 1.99252300  |
| H | -2.42681400 | -3.45868800 | 1.10289400  |
| H | -0.73081200 | -3.07259800 | 1.45195200  |
| C | -3.47137700 | -0.09843100 | 0.32623200  |
| H | -3.56713500 | 0.96621200  | 0.08506100  |
| H | -4.44202500 | -0.57487500 | 0.12948100  |
| H | -3.27857500 | -0.17331000 | 1.40159900  |
| C | -2.82017400 | 0.59908000  | -2.68615300 |
| H | -2.76135400 | 1.60223800  | -2.24877100 |
| H | -2.40462900 | 0.66465400  | -3.69747900 |
| H | -3.88135400 | 0.33303700  | -2.78464700 |
| C | 3.75837600  | 0.75201600  | -1.81308200 |
| C | 2.43777500  | 0.40928700  | -2.13905500 |
| H | 4.57568200  | 0.94672000  | -2.49195300 |
| H | 1.96789600  | 0.28848300  | -3.10745100 |
| N | 2.54860200  | 0.48545100  | 0.00963400  |
| C | 0.60210300  | 0.07914200  | 1.29925000  |
| C | 1.98154100  | 0.36747900  | 1.29793700  |
| C | 0.02032500  | -0.01645600 | 2.56449300  |
| C | 2.74955300  | 0.51618400  | 2.44709500  |
| C | 0.75442500  | 0.13721900  | 3.74171200  |
| H | -1.04648900 | -0.20487400 | 2.66711600  |
| C | 2.12838200  | 0.39590200  | 3.68182600  |
| H | 3.81940500  | 0.70663800  | 2.38880500  |
| H | 2.73394000  | 0.45366400  | 4.58514100  |
| H | -0.37281500 | 1.45323700  | -0.32910000 |
| C | 0.02235700  | -0.02484300 | 5.02858500  |
| O | -1.01489600 | -0.62869600 | 5.13542500  |
| O | 0.58569500  | 0.55204500  | 6.11502400  |
| C | 1.01824900  | 3.67487900  | -2.05542600 |
| H | 0.98322400  | 4.71129300  | -1.70267100 |
| H | 1.28240800  | 3.03059000  | -1.20459400 |
| H | 1.81564400  | 3.58678300  | -2.80398300 |
| C | -0.32338300 | 3.26362400  | -2.62727100 |
| H | -0.27197100 | 2.21616300  | -2.98361400 |
| H | -0.58004500 | 3.88447200  | -3.49523400 |
| O | -1.37243700 | 3.42600800  | -1.70018500 |
| H | -1.20655800 | 2.78468200  | -0.99078400 |
| C | 3.79106000  | 0.79637200  | -0.43602600 |
| N | 1.71627500  | 0.25014600  | -1.03049200 |

|   |            |            |            |
|---|------------|------------|------------|
| H | 4.59344700 | 1.02567400 | 0.25081000 |
| H | 1.31173100 | 1.12602100 | 5.84215100 |

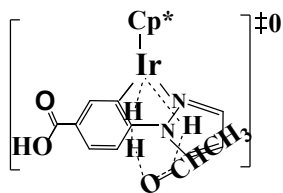

TS<sub>22-23</sub>

57 -646.34i cm<sup>-1</sup>

E=-1294.814606(au)

|    |             |             |             |
|----|-------------|-------------|-------------|
| C  | -1.19278100 | -1.99052900 | 2.40091400  |
| C  | -1.68017400 | -1.05370200 | 1.39941000  |
| C  | -2.65173800 | -0.22562700 | 2.01551500  |
| C  | -1.92970600 | -1.76369000 | 3.62340600  |
| C  | -2.78995100 | -0.62854000 | 3.40866400  |
| Ir | -0.70754200 | -0.01610700 | 3.16347100  |
| C  | -1.23625200 | -0.97863200 | -0.02267100 |
| H  | -1.90134200 | -1.55286300 | -0.68124700 |
| H  | -1.22492800 | 0.05698300  | -0.38210100 |
| H  | -0.22701800 | -1.38732300 | -0.15131100 |
| C  | -0.21043700 | -3.08335500 | 2.15906900  |
| H  | 0.27673700  | -3.39134700 | 3.08968800  |
| H  | -0.70051900 | -3.96570900 | 1.72630600  |
| H  | 0.57666100  | -2.76814900 | 1.46482700  |
| C  | -1.85037400 | -2.58512000 | 4.86241800  |
| H  | -2.06594000 | -1.99348600 | 5.75838700  |
| H  | -2.57806100 | -3.40606300 | 4.82502400  |
| H  | -0.85473400 | -3.02176900 | 4.99432400  |
| C  | -3.80650100 | -0.08944000 | 4.35552900  |
| H  | -3.93052600 | 0.99026400  | 4.22784500  |
| H  | -4.78219500 | -0.56779000 | 4.19458900  |
| H  | -3.52130300 | -0.26742100 | 5.39799600  |
| C  | -3.38477900 | 0.90523400  | 1.38255400  |
| H  | -2.99920900 | 1.88508600  | 1.72047000  |
| H  | -3.30137600 | 0.86627200  | 0.29189500  |
| H  | -4.44942900 | 0.85749300  | 1.64118100  |
| C  | 3.36593800  | 0.62955800  | 1.80803800  |
| C  | 2.02928100  | 0.32877600  | 1.51246700  |
| H  | 4.18256300  | 0.75587000  | 1.11253900  |
| H  | 1.53933300  | 0.18373700  | 0.55671100  |
| N  | 2.16904900  | 0.50725800  | 3.65539900  |
| C  | 0.21256700  | 0.29395800  | 4.97399400  |
| C  | 1.60154400  | 0.51153800  | 4.95036700  |
| C  | -0.37165900 | 0.29330100  | 6.24058200  |

|   |             |             |            |
|---|-------------|-------------|------------|
| C | 2.37846400  | 0.70936700  | 6.08704400 |
| C | 0.37127300  | 0.49439200  | 7.40405300 |
| H | -1.44654100 | 0.15533700  | 6.35202200 |
| C | 1.75362900  | 0.69929500  | 7.32532400 |
| H | 3.45463500  | 0.85376900  | 6.01697700 |
| H | 2.35970900  | 0.79975800  | 8.22441400 |
| H | -1.68313900 | 1.86524600  | 3.99701600 |
| C | -0.35681900 | 0.43272500  | 8.70222300 |
| O | -1.38943700 | -0.16770800 | 8.85821100 |
| O | 0.20955100  | 1.09512400  | 9.73607800 |
| C | 0.70916400  | 3.65626300  | 2.22427500 |
| H | 0.70194000  | 4.67745500  | 1.82584600 |
| H | 0.79124000  | 3.72826100  | 3.31744500 |
| H | 1.59411200  | 3.13433700  | 1.83166200 |
| C | -0.58660000 | 2.93427600  | 1.86822000 |
| H | -0.43268900 | 1.85382000  | 2.33054600 |
| H | -0.63058700 | 2.68332400  | 0.77714200 |
| O | -1.68732300 | 3.45681900  | 2.36427600 |
| H | -1.84422500 | 2.56744200  | 3.56660000 |
| C | 3.41654500  | 0.74070800  | 3.18217700 |
| N | 1.31742300  | 0.25547000  | 2.63646400 |
| H | 4.23643200  | 0.97066800  | 3.84782700 |
| H | 0.92567700  | 1.65598000  | 9.41353500 |

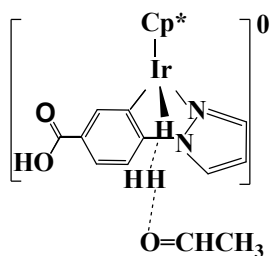

23

57

**E=-1294.849726(au)**

|    |             |             |             |
|----|-------------|-------------|-------------|
| C  | -0.83983300 | -2.21496500 | -1.51932400 |
| C  | -1.31531600 | -1.12496200 | -2.35839000 |
| C  | -2.25006500 | -0.36461900 | -1.60503500 |
| C  | -1.47481900 | -2.11540100 | -0.25690600 |
| C  | -2.31156700 | -0.92631100 | -0.27067600 |
| Ir | -0.28060200 | -0.18552200 | -0.55188600 |
| C  | -0.96927900 | -0.94173400 | -3.79785600 |
| H  | -1.58334400 | -1.58672200 | -4.44187500 |
| H  | -1.13044700 | 0.09255500  | -4.12141200 |
| H  | 0.07869500  | -1.19962400 | -3.99788400 |
| C  | 0.13273100  | -3.25114400 | -1.96987500 |

|   |             |             |             |
|---|-------------|-------------|-------------|
| H | 0.52984500  | -3.82541500 | -1.12696100 |
| H | -0.33206300 | -3.95978000 | -2.66894400 |
| H | 0.98686000  | -2.79740800 | -2.48957300 |
| C | -1.31994400 | -3.02962000 | 0.90926000  |
| H | -1.24762500 | -2.47042900 | 1.84991000  |
| H | -2.17893900 | -3.70791800 | 0.99593100  |
| H | -0.41563500 | -3.64098000 | 0.82519600  |
| C | -3.27747100 | -0.52717500 | 0.79482900  |
| H | -3.36869900 | 0.56277300  | 0.86447800  |
| H | -4.27878800 | -0.93526100 | 0.60024500  |
| H | -2.96475300 | -0.89400700 | 1.77885800  |
| C | -3.04681000 | 0.80086500  | -2.08323800 |
| H | -3.28315700 | 1.48059900  | -1.25764500 |
| H | -2.50747900 | 1.39621800  | -2.82744600 |
| H | -3.99492100 | 0.46586000  | -2.52512700 |
| C | 3.78830000  | 0.63908800  | -1.79951200 |
| C | 2.47085900  | 0.29211700  | -2.13534400 |
| H | 4.62048300  | 0.79607200  | -2.47017600 |
| H | 2.01969800  | 0.12525100  | -3.10613300 |
| N | 2.54392800  | 0.45329600  | 0.01083200  |
| C | 0.57160100  | 0.10792300  | 1.27814300  |
| C | 1.95175200  | 0.39498300  | 1.29334300  |
| C | -0.03567000 | 0.06160900  | 2.53623400  |
| C | 2.69764600  | 0.59294500  | 2.44933900  |
| C | 0.67651800  | 0.26689100  | 3.71953200  |
| H | -1.10542500 | -0.12472000 | 2.62288100  |
| C | 2.05133100  | 0.52533900  | 3.67543000  |
| H | 3.76880100  | 0.78052000  | 2.40561400  |
| H | 2.63802900  | 0.62226200  | 4.58772200  |
| H | -1.57803200 | 2.82480100  | 0.87395000  |
| C | -0.07574200 | 0.16251100  | 5.00118100  |
| O | -1.10635200 | -0.44887800 | 5.12430500  |
| O | 0.46280800  | 0.80508700  | 6.06350600  |
| C | 1.00866600  | 3.69250900  | -1.39297800 |
| H | 1.91330200  | 3.92057800  | -1.97071900 |
| H | 0.62482700  | 4.59643700  | -0.91291800 |
| H | 1.29227600  | 2.95720300  | -0.62768400 |
| C | -0.03378300 | 3.08998300  | -2.28368000 |
| H | -0.39979500 | 1.40302600  | -0.43782600 |
| H | 0.30459200  | 2.18900900  | -2.85242600 |
| O | -1.15688700 | 3.51612000  | -2.41795900 |
| H | -1.70433600 | 3.48199600  | 0.54227500  |
| C | 3.79708500  | 0.73713900  | -0.42465500 |
| N | 1.72687400  | 0.18368700  | -1.03398600 |

|   |            |            |            |
|---|------------|------------|------------|
| H | 4.58965800 | 0.98525300 | 0.26700700 |
| H | 1.18590200 | 1.37268900 | 5.77019700 |

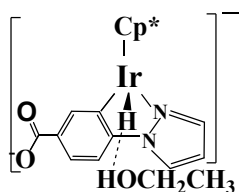

24

56

E=-1294.429746(au)

|    |             |             |             |
|----|-------------|-------------|-------------|
| C  | -0.79318400 | -2.24537100 | -1.18457200 |
| C  | -1.16177500 | -1.34689700 | -2.26603500 |
| C  | -2.14915300 | -0.45071900 | -1.79276600 |
| C  | -1.56050100 | -1.88951100 | -0.04139800 |
| C  | -2.35285400 | -0.72446300 | -0.37847900 |
| Ir | -0.26753700 | -0.10106200 | -0.53556300 |
| C  | -0.61255700 | -1.43561500 | -3.65066300 |
| H  | -1.11515600 | -2.21931800 | -4.23593700 |
| H  | -0.72477000 | -0.48893300 | -4.19196500 |
| H  | 0.45659600  | -1.68327800 | -3.63474900 |
| C  | 0.18526100  | -3.36418800 | -1.30667500 |
| H  | 0.48649900  | -3.73542200 | -0.32151800 |
| H  | -0.22676000 | -4.21316300 | -1.87236900 |
| H  | 1.09855200  | -3.03840500 | -1.82232800 |
| C  | -1.57238800 | -2.60066300 | 1.26852300  |
| H  | -1.76998400 | -1.93099000 | 2.11262600  |
| H  | -2.34694700 | -3.37974400 | 1.27201900  |
| H  | -0.60883600 | -3.07935300 | 1.47398400  |
| C  | -3.40206000 | -0.09545200 | 0.47616500  |
| H  | -3.52673300 | 0.96418300  | 0.22384600  |
| H  | -4.37771300 | -0.58826500 | 0.35073800  |
| H  | -3.13615300 | -0.14652900 | 1.53771000  |
| C  | -2.91021500 | 0.55740400  | -2.58918600 |
| H  | -2.83343300 | 1.56877600  | -2.17389600 |
| H  | -2.54366500 | 0.60686300  | -3.62109600 |
| H  | -3.97543800 | 0.28834900  | -2.63104100 |
| C  | 3.79443300  | 0.69642700  | -1.81267100 |
| C  | 2.47091100  | 0.38807500  | -2.14343400 |
| H  | 4.62151600  | 0.86969000  | -2.48628600 |
| H  | 1.99696900  | 0.28357900  | -3.11213500 |
| N  | 2.57077000  | 0.46457500  | 0.00995600  |
| C  | 0.60836300  | 0.14401600  | 1.29606600  |
| C  | 1.99381500  | 0.36438100  | 1.30302300  |
| C  | -0.00066500 | 0.06302400  | 2.54716200  |

|   |             |             |             |
|---|-------------|-------------|-------------|
| C | 2.75332300  | 0.46047000  | 2.46933800  |
| C | 0.72185700  | 0.11674700  | 3.73653400  |
| H | -1.07751200 | -0.05708600 | 2.65746800  |
| C | 2.10375600  | 0.32586100  | 3.68778600  |
| H | 3.83132200  | 0.62342600  | 2.42189100  |
| H | 2.62895800  | 0.37323200  | 4.63965300  |
| H | -0.32816200 | 1.49784700  | -0.34508600 |
| C | -0.00350000 | -0.09320600 | 5.08862100  |
| O | -1.21409300 | -0.39144900 | 4.98866100  |
| O | 0.71868800  | 0.04690800  | 6.09724200  |
| C | 1.01687300  | 3.62359800  | -2.19433000 |
| H | 0.99250800  | 4.67497300  | -1.88593800 |
| H | 1.30053000  | 3.01522300  | -1.32444700 |
| H | 1.79507800  | 3.49861200  | -2.95850900 |
| C | -0.34079400 | 3.19226700  | -2.71293600 |
| H | -0.30174500 | 2.12870900  | -3.01744300 |
| H | -0.61659400 | 3.77479100  | -3.60322300 |
| O | -1.36409800 | 3.39966300  | -1.76771800 |
| H | -1.19522200 | 2.76016800  | -1.05390600 |
| C | 3.81809600  | 0.74162500  | -0.42884200 |
| N | 1.73973300  | 0.25084300  | -1.03159000 |
| H | 4.61685400  | 0.94933700  | 0.26922900  |

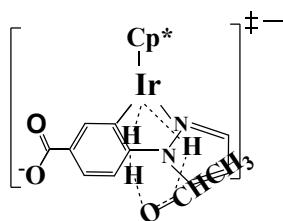

TS<sub>24-25</sub>

56 -493.35i cm<sup>-1</sup>

E=-1294.360037(au)

|    |             |             |             |
|----|-------------|-------------|-------------|
| C  | -1.15869300 | -1.93234200 | 2.52258600  |
| C  | -1.68931200 | -1.09068200 | 1.45913100  |
| C  | -2.65717700 | -0.23406100 | 2.03361300  |
| C  | -1.89815100 | -1.64992700 | 3.73722300  |
| C  | -2.77646300 | -0.54615900 | 3.45458000  |
| Ir | -0.70355200 | 0.07291900  | 3.16387900  |
| C  | -1.26516000 | -1.10154300 | 0.02849600  |
| H  | -1.96372200 | -1.67504800 | -0.59735300 |
| H  | -1.21103400 | -0.08562000 | -0.38103600 |
| H  | -0.27661700 | -1.55986800 | -0.09216200 |
| C  | -0.14729300 | -3.01325400 | 2.35217000  |
| H  | 0.37008600  | -3.21346400 | 3.29611300  |
| H  | -0.61333900 | -3.94913000 | 2.01351600  |

|   |             |             |            |
|---|-------------|-------------|------------|
| H | 0.61537100  | -2.73329600 | 1.61609900 |
| C | -1.80687600 | -2.40732100 | 5.01671300 |
| H | -2.00395300 | -1.78198400 | 5.89487100 |
| H | -2.53314900 | -3.23164000 | 5.01815300 |
| H | -0.80874600 | -2.83600300 | 5.15618400 |
| C | -3.78257300 | 0.04515500  | 4.38173300 |
| H | -3.91500700 | 1.11394700  | 4.18582300 |
| H | -4.75843900 | -0.44843500 | 4.26923400 |
| H | -3.47364400 | -0.05902100 | 5.42742000 |
| C | -3.40495800 | 0.84747400  | 1.33423700 |
| H | -2.97733800 | 1.84812000  | 1.54768600 |
| H | -3.38499600 | 0.69499400  | 0.24931700 |
| H | -4.45387000 | 0.85690400  | 1.65543600 |
| C | 3.37899300  | 0.74017000  | 1.83639600 |
| C | 2.05286500  | 0.42709300  | 1.52702900 |
| H | 4.20302700  | 0.87764500  | 1.15124900 |
| H | 1.57070600  | 0.28647200  | 0.56709300 |
| N | 2.16451700  | 0.60786200  | 3.67471400 |
| C | 0.19713600  | 0.40573600  | 4.97566600 |
| C | 1.58643500  | 0.58740800  | 4.97160200 |
| C | -0.40941300 | 0.34674200  | 6.22802200 |
| C | 2.35053500  | 0.69674900  | 6.13342500 |
| C | 0.31827300  | 0.39548600  | 7.41295500 |
| H | -1.48604800 | 0.23315700  | 6.34520200 |
| C | 1.70152700  | 0.59234900  | 7.35592600 |
| H | 3.43130500  | 0.83560400  | 6.08021400 |
| H | 2.23280900  | 0.64022900  | 8.30439700 |
| H | -1.65898500 | 2.02546200  | 3.86347000 |
| C | -0.40267800 | 0.15157100  | 8.76156500 |
| O | -1.59903700 | -0.19777300 | 8.65055800 |
| O | 0.31065900  | 0.30829200  | 9.77262300 |
| C | 0.65342900  | 3.72719300  | 1.98726800 |
| H | 0.62284600  | 4.73637300  | 1.55752600 |
| H | 0.69461400  | 3.82831400  | 3.08062400 |
| H | 1.57109200  | 3.22409900  | 1.64672400 |
| C | -0.60376400 | 2.94318600  | 1.61314000 |
| H | -0.43575000 | 1.90770800  | 2.13535300 |
| H | -0.57957700 | 2.64154700  | 0.53042300 |
| O | -1.74323000 | 3.47322700  | 2.01545800 |
| H | -1.86297900 | 2.64717600  | 3.35605500 |
| C | 3.40952300  | 0.85255100  | 3.21747800 |
| N | 1.32884500  | 0.34674900  | 2.64899700 |
| H | 4.21243000  | 1.09249400  | 3.90032800 |

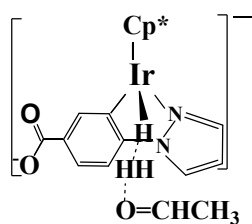

25

56

**E=-1294.392848(au)**

|    |             |             |             |
|----|-------------|-------------|-------------|
| C  | -0.86247400 | -2.26936700 | -1.40068500 |
| C  | -1.34190500 | -1.23043800 | -2.29977200 |
| C  | -2.25746900 | -0.41715100 | -1.57905500 |
| C  | -1.48550500 | -2.09330300 | -0.14025400 |
| C  | -2.31373800 | -0.90293300 | -0.21420400 |
| Ir | -0.28199900 | -0.18091100 | -0.55376500 |
| C  | -1.00479200 | -1.12574700 | -3.74961600 |
| H  | -1.65686500 | -1.75918700 | -4.36976800 |
| H  | -1.10811200 | -0.09543600 | -4.11055300 |
| H  | 0.02688600  | -1.44551700 | -3.94509800 |
| C  | 0.11567400  | -3.32582700 | -1.79028800 |
| H  | 0.52127100  | -3.83741800 | -0.91124000 |
| H  | -0.33959700 | -4.08523400 | -2.44263400 |
| H  | 0.96599500  | -2.89483100 | -2.33628900 |
| C  | -1.32459600 | -2.92867900 | 1.08333300  |
| H  | -1.10784300 | -2.31124600 | 1.96477000  |
| H  | -2.24038500 | -3.49702500 | 1.29630500  |
| H  | -0.50198900 | -3.64381000 | 0.97666700  |
| C  | -3.26079600 | -0.43561900 | 0.84080800  |
| H  | -3.34434900 | 0.65728200  | 0.84461100  |
| H  | -4.26783800 | -0.85175700 | 0.69056500  |
| H  | -2.92560500 | -0.73157800 | 1.84063800  |
| C  | -3.04601000 | 0.73035800  | -2.11356200 |
| H  | -3.24375700 | 1.46730100  | -1.32739100 |
| H  | -2.51227600 | 1.26210800  | -2.90919600 |
| H  | -4.01456000 | 0.39364900  | -2.51039800 |
| C  | 3.78440900  | 0.59455400  | -1.82136800 |
| C  | 2.46978800  | 0.24531100  | -2.14875400 |
| H  | 4.62004400  | 0.73057100  | -2.49312400 |
| H  | 2.01413600  | 0.05365700  | -3.11301600 |
| N  | 2.53914500  | 0.45922600  | -0.00256800 |
| C  | 0.56656800  | 0.16636100  | 1.27815700  |
| C  | 1.94436300  | 0.43744900  | 1.28692500  |
| C  | -0.05184400 | 0.14652100  | 2.53098500  |
| C  | 2.68537400  | 0.65463700  | 2.44920100  |



|   |             |             |             |
|---|-------------|-------------|-------------|
| C | 0.65142800  | 0.33967900  | 3.71889000  |
| H | -1.12330400 | -0.01891800 | 2.64299200  |
| C | 2.02490200  | 0.59883700  | 3.66703600  |
| H | 3.75709900  | 0.85503100  | 2.40103500  |
| H | 2.53205200  | 0.74996800  | 4.61785000  |
| H | -1.55122800 | 2.92197400  | 0.87056400  |
| C | -0.08096100 | 0.25439700  | 5.08234400  |
| O | -1.29701600 | -0.02344700 | 5.00680800  |
| O | 0.64425800  | 0.46702600  | 6.07659200  |
| C | 1.08056300  | 3.58701000  | -1.40902400 |
| H | 2.05293700  | 3.66425700  | -1.91229000 |
| H | 0.74960900  | 4.56790300  | -1.05744100 |
| H | 1.21738500  | 2.91226200  | -0.55309400 |
| C | 0.06721000  | 2.99287400  | -2.33845000 |
| H | -0.39762900 | 1.40435000  | -0.46047100 |
| H | 0.37342400  | 2.02306700  | -2.79813100 |
| O | -0.99996400 | 3.49722000  | -2.60892800 |
| H | -1.74641700 | 3.43428900  | 0.36328600  |
| C | 3.78899600  | 0.72649500  | -0.44284400 |
| N | 1.72427000  | 0.16777000  | -1.03869800 |
| H | 4.57628200  | 0.98809500  | 0.25001400  |

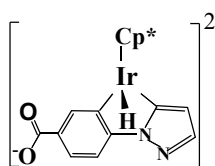

**F<sub>Ir</sub>**

**46**

**E=-1138.951017(au)**

|    |             |             |             |
|----|-------------|-------------|-------------|
| C  | -1.25322000 | -2.00804100 | 2.30618000  |
| C  | -1.84729300 | -1.09926900 | 1.34987700  |
| C  | -2.85158000 | -0.35188600 | 2.03622300  |
| C  | -1.89581400 | -1.81325700 | 3.56143600  |
| C  | -2.89092000 | -0.78035700 | 3.40715700  |
| Ir | -0.83553900 | 0.17959400  | 2.99795500  |
| C  | -1.52121000 | -1.05784200 | -0.10553700 |
| H  | -2.04707100 | -1.83994200 | -0.68150400 |
| H  | -1.78483900 | -0.08872600 | -0.54747200 |
| H  | -0.44533200 | -1.20220500 | -0.26911500 |
| C  | -0.15806000 | -2.96943000 | 1.98377800  |
| H  | 0.27543500  | -3.39413200 | 2.89661500  |
| H  | -0.50801000 | -3.80647100 | 1.35720100  |
| H  | 0.65965000  | -2.46831900 | 1.44733500  |
| C  | -1.61356000 | -2.52200000 | 4.84350300  |

|   |             |             |            |
|---|-------------|-------------|------------|
| H | -1.46706600 | -1.80604600 | 5.66397500 |
| H | -2.43585700 | -3.19676200 | 5.12629700 |
| H | -0.69541500 | -3.11671500 | 4.77564500 |
| C | -3.88341000 | -0.36467000 | 4.44139000 |
| H | -4.15502500 | 0.69261800  | 4.33342400 |
| H | -4.81538300 | -0.95446700 | 4.39254900 |
| H | -3.47557100 | -0.47948900 | 5.45243100 |
| C | -3.77061900 | 0.65605200  | 1.42811400 |
| H | -3.31270300 | 1.13575700  | 0.55454800 |
| H | -4.72362900 | 0.20563600  | 1.10521800 |
| H | -4.00408700 | 1.45104700  | 2.14596400 |
| C | 3.18794500  | 0.79481400  | 1.74103200 |
| C | 1.88500300  | 0.49311700  | 1.28884900 |
| H | 4.10415600  | 0.87466400  | 1.15800300 |
| H | 1.55665600  | 0.30997600  | 0.27055100 |
| N | 1.95253800  | 0.82660200  | 3.43960900 |
| C | 0.05734600  | 0.63116600  | 4.79635100 |
| C | 1.44162200  | 0.88875200  | 4.75036600 |
| C | -0.53140000 | 0.65960000  | 6.06414000 |
| C | 2.20165700  | 1.15270000  | 5.88278300 |
| C | 0.20067500  | 0.90349900  | 7.23584300 |
| H | -1.60287600 | 0.49861100  | 6.19518800 |
| C | 1.56913400  | 1.15429700  | 7.12592500 |
| H | 3.26987800  | 1.34185600  | 5.77208000 |
| H | 2.11213700  | 1.34850200  | 8.04995200 |
| H | -0.92480300 | 1.77324600  | 2.93012300 |
| C | -0.48462500 | 0.89229400  | 8.62052500 |
| O | -1.71056100 | 0.62659900  | 8.62360300 |
| O | 0.26250400  | 1.14604200  | 9.59664900 |
| C | 1.07726100  | 0.51926100  | 2.43015300 |
| N | 3.24133100  | 0.99950300  | 3.05683800 |

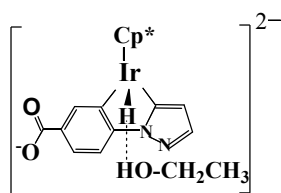

26

55

E=-1293.956325(au)

|   |             |             |             |
|---|-------------|-------------|-------------|
| C | -0.78725700 | -2.12609700 | -1.44781800 |
| C | -1.36858400 | -1.09445100 | -2.28139300 |
| C | -2.37643500 | -0.43854100 | -1.50951700 |
| C | -1.43985700 | -2.09268600 | -0.18019900 |
| C | -2.42638600 | -1.04162100 | -0.20501100 |

|    |             |             |             |
|----|-------------|-------------|-------------|
| Ir | -0.36176300 | -0.06649100 | -0.48224100 |
| C  | -1.02191100 | -0.82246000 | -3.70971400 |
| H  | -1.70838300 | -1.31990900 | -4.41587400 |
| H  | -1.03612100 | 0.25510300  | -3.92006600 |
| H  | -0.00853300 | -1.18055200 | -3.93400900 |
| C  | 0.30653600  | -3.04801300 | -1.87288000 |
| H  | 0.73362400  | -3.57117300 | -1.00986900 |
| H  | -0.04414100 | -3.80876400 | -2.58862200 |
| H  | 1.12931800  | -2.49326600 | -2.34441400 |
| C  | -1.16616000 | -2.96965600 | 0.99564900  |
| H  | -1.08099100 | -2.37954600 | 1.91784500  |
| H  | -1.96149900 | -3.71593900 | 1.14342800  |
| H  | -0.21718000 | -3.50538600 | 0.87749700  |
| C  | -3.41586900 | -0.74651800 | 0.87207700  |
| H  | -3.68262100 | 0.31733900  | 0.88469600  |
| H  | -4.34922000 | -1.32307600 | 0.75478400  |
| H  | -3.00642500 | -0.98008600 | 1.86188300  |
| C  | -3.29270300 | 0.63541700  | -1.99817400 |
| H  | -3.54630700 | 1.32947700  | -1.18796100 |
| H  | -2.82702600 | 1.22574900  | -2.79509900 |
| H  | -4.23534200 | 0.21574800  | -2.38497600 |
| C  | 3.68344600  | 0.54208500  | -1.67980100 |
| C  | 2.38018100  | 0.27517400  | -2.15402500 |
| H  | 4.60364600  | 0.64193300  | -2.25222300 |
| H  | 2.06006400  | 0.13074900  | -3.18169500 |
| N  | 2.43551800  | 0.50791100  | 0.01176200  |
| C  | 0.54806700  | 0.17097700  | 1.35539100  |
| C  | 1.92957300  | 0.44174500  | 1.32591700  |
| C  | -0.03447400 | 0.06468900  | 2.62036700  |
| C  | 2.69702700  | 0.58850100  | 2.47462700  |
| C  | 0.70631200  | 0.18379300  | 3.80535000  |
| H  | -1.10481300 | -0.11217800 | 2.74060100  |
| C  | 2.07284700  | 0.45295700  | 3.71392800  |
| H  | 3.76383100  | 0.79175200  | 2.37833200  |
| H  | 2.62053500  | 0.54724500  | 4.65054000  |
| H  | -0.45078700 | 1.52143900  | -0.26740500 |
| C  | 0.03116700  | 0.01350900  | 5.18495000  |
| O  | -1.18940900 | -0.27315700 | 5.16349300  |
| O  | 0.78140000  | 0.17487900  | 6.17742500  |
| C  | 1.56340700  | 0.26546000  | -1.01769700 |
| N  | 3.72870500  | 0.68115300  | -0.35551900 |
| C  | 1.31709100  | 3.66651600  | -2.09483200 |
| H  | 0.73920400  | 4.48847000  | -1.65422300 |
| H  | 1.50750700  | 2.91849300  | -1.31448000 |

|   |             |            |             |
|---|-------------|------------|-------------|
| H | 2.28827000  | 4.05353800 | -2.43107400 |
| C | 0.55624600  | 3.03377000 | -3.24280700 |
| H | 1.17739700  | 2.23068700 | -3.67956800 |
| H | 0.37821600  | 3.77399100 | -4.04008800 |
| O | -0.70546500 | 2.54757900 | -2.85959100 |
| H | -0.56364300 | 1.91791400 | -2.11773000 |

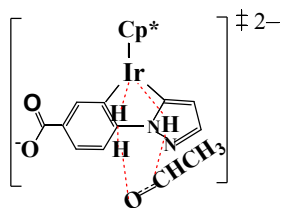

TS<sub>26-27</sub>

55 -334.31i cm<sup>-1</sup>

E=-1293.886978(au)

|    |             |             |             |
|----|-------------|-------------|-------------|
| C  | -1.06967600 | -1.79611100 | 2.51825800  |
| C  | -1.65566500 | -0.96414200 | 1.48489000  |
| C  | -2.67778800 | -0.19056000 | 2.10265200  |
| C  | -1.83236600 | -1.59037800 | 3.74859200  |
| C  | -2.81715000 | -0.58542800 | 3.48733600  |
| Ir | -0.67313300 | 0.17619700  | 3.21930400  |
| C  | -1.23252400 | -0.88239300 | 0.05671700  |
| H  | -1.84422400 | -1.51952300 | -0.60298500 |
| H  | -1.30369400 | 0.14915700  | -0.31193100 |
| H  | -0.18676000 | -1.19177300 | -0.06083400 |
| C  | -0.01390100 | -2.82986400 | 2.31472700  |
| H  | 0.52225700  | -3.02343300 | 3.25066300  |
| H  | -0.43810900 | -3.78070800 | 1.95698500  |
| H  | 0.73260300  | -2.48742600 | 1.58910500  |
| C  | -1.66975800 | -2.37324000 | 5.00727200  |
| H  | -1.92437700 | -1.78779700 | 5.89837500  |
| H  | -2.30236900 | -3.27322900 | 4.98881300  |
| H  | -0.62903600 | -2.68882600 | 5.14017100  |
| C  | -3.83849100 | -0.05701700 | 4.43759100  |
| H  | -3.96305200 | 1.02537300  | 4.31416700  |
| H  | -4.82428700 | -0.52699400 | 4.29006000  |
| H  | -3.54047500 | -0.22900500 | 5.47819700  |
| C  | -3.48555800 | 0.87009300  | 1.43539400  |
| H  | -3.05693400 | 1.88446500  | 1.59929200  |
| H  | -3.52955600 | 0.69834600  | 0.35240900  |
| H  | -4.51419300 | 0.86959000  | 1.81913800  |
| C  | 3.43853600  | 0.47224200  | 2.10246800  |
| C  | 2.12394200  | 0.36463300  | 1.60008800  |
| H  | 4.37233700  | 0.51902000  | 1.54675600  |

|   |             |             |            |
|---|-------------|-------------|------------|
| H | 1.79840300  | 0.34902300  | 0.56470600 |
| N | 2.17086500  | 0.44798100  | 3.77681000 |
| C | 0.22316700  | 0.40556700  | 5.06496000 |
| C | 1.62719600  | 0.45571000  | 5.07775300 |
| C | -0.41338700 | 0.36598900  | 6.30392200 |
| C | 2.36958900  | 0.47479300  | 6.25169900 |
| C | 0.29605500  | 0.32523500  | 7.50971700 |
| H | -1.50028000 | 0.33437100  | 6.38834900 |
| C | 1.68874200  | 0.40223400  | 7.46749200 |
| H | 3.45676300  | 0.52087000  | 6.19323200 |
| H | 2.21354700  | 0.38441200  | 8.42173200 |
| H | -1.62213500 | 2.20561700  | 3.89469900 |
| C | -0.45196800 | 0.11606000  | 8.84371300 |
| O | -1.67336000 | -0.15108000 | 8.73586100 |
| O | 0.24746600  | 0.20945800  | 9.87899600 |
| C | 1.30030400  | 0.35466400  | 2.72542800 |
| N | 3.47557900  | 0.51891200  | 3.43512200 |
| C | 0.45758600  | 3.83097700  | 1.42290800 |
| H | 0.31278000  | 4.74602100  | 0.83005800 |
| H | 0.64172300  | 4.12793100  | 2.46399700 |
| H | 1.34589300  | 3.29661300  | 1.05606000 |
| C | -0.79334400 | 2.95108300  | 1.37364500 |
| H | -0.49273700 | 2.01871100  | 2.00254200 |
| H | -0.88371100 | 2.49692500  | 0.34079900 |
| O | -1.90090300 | 3.51698800  | 1.82786200 |
| H | -1.85812900 | 2.76117700  | 3.35351800 |

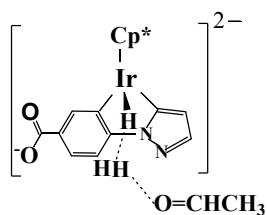

27

55

**E=-1293.915456(au)**

|    |             |             |             |
|----|-------------|-------------|-------------|
| C  | -0.80692600 | -2.11218300 | -1.42330500 |
| C  | -1.31399600 | -1.05508900 | -2.27255500 |
| C  | -2.30349200 | -0.34223200 | -1.53436900 |
| C  | -1.49317300 | -2.04158800 | -0.17534000 |
| C  | -2.41745200 | -0.93680700 | -0.22726200 |
| Ir | -0.30013600 | -0.07559900 | -0.43467400 |
| C  | -0.92932900 | -0.84227600 | -3.69881900 |
| H  | -1.47413100 | -1.51297600 | -4.38456700 |
| H  | -1.12923600 | 0.18767500  | -4.02177200 |

|   |             |             |             |
|---|-------------|-------------|-------------|
| H | 0.14262300  | -1.02890300 | -3.84760700 |
| C | 0.24041000  | -3.09161600 | -1.83544300 |
| H | 0.65068100  | -3.61887300 | -0.96664500 |
| H | -0.14553100 | -3.84784300 | -2.53886900 |
| H | 1.08102400  | -2.57922500 | -2.32286900 |
| C | -1.31017000 | -2.93867300 | 1.00272700  |
| H | -1.14811600 | -2.36171400 | 1.92334100  |
| H | -2.18664200 | -3.58528000 | 1.15895600  |
| H | -0.43384300 | -3.58433300 | 0.87586600  |
| C | -3.40781700 | -0.57603900 | 0.82975100  |
| H | -3.58598700 | 0.50662300  | 0.85420600  |
| H | -4.38272400 | -1.07181200 | 0.68432100  |
| H | -3.04075400 | -0.85460200 | 1.82448000  |
| C | -3.14177900 | 0.78186400  | -2.04907900 |
| H | -3.45004800 | 1.44530000  | -1.23243500 |
| H | -2.60155100 | 1.40126100  | -2.77638100 |
| H | -4.05827500 | 0.41304100  | -2.53678300 |
| C | 3.73826200  | 0.67468900  | -1.58781800 |
| C | 2.44448300  | 0.39456800  | -2.08106200 |
| H | 4.65640300  | 0.83520200  | -2.14999300 |
| H | 2.13381800  | 0.31162600  | -3.11870200 |
| N | 2.49001000  | 0.49539800  | 0.09365200  |
| C | 0.59978000  | 0.08237700  | 1.41245800  |
| C | 1.97890100  | 0.36978700  | 1.40146500  |
| C | 0.01283900  | -0.07425100 | 2.67062000  |
| C | 2.73871100  | 0.48399600  | 2.55887600  |
| C | 0.74574000  | 0.01202500  | 3.86290900  |
| H | -1.05568900 | -0.26862600 | 2.78091000  |
| C | 2.10970400  | 0.29860500  | 3.78921800  |
| H | 3.80335700  | 0.70367600  | 2.47616800  |
| H | 2.65022800  | 0.36659300  | 4.73223400  |
| H | -1.85095400 | 3.27040000  | -0.28067600 |
| C | 0.06447000  | -0.21065000 | 5.23183300  |
| O | -1.15240300 | -0.51093900 | 5.19278600  |
| O | 0.80653300  | -0.07195100 | 6.23379500  |
| C | 1.62634400  | 0.28512300  | -0.94964000 |
| N | 3.77645300  | 0.73648000  | -0.25714800 |
| C | 1.03587500  | 3.56361700  | -1.93103400 |
| H | 2.03247100  | 3.19451100  | -2.20754700 |
| H | 0.95996700  | 4.64873900  | -2.05298300 |
| H | 0.91049600  | 3.26882300  | -0.88030800 |
| C | 0.00365100  | 2.85766400  | -2.74862200 |
| H | -0.35311000 | 1.50490500  | -0.18684600 |
| H | 0.00276400  | 1.75279000  | -2.61602600 |

|   |             |            |             |
|---|-------------|------------|-------------|
| O | -0.79440600 | 3.41288700 | -3.48129500 |
| H | -2.05378000 | 3.78835500 | -0.78021100 |

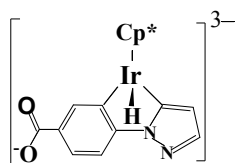

**3-F<sub>Ir</sub>**

**46**

**E=-1138.867833(au)**

|    |             |             |             |
|----|-------------|-------------|-------------|
| C  | -1.16061600 | -1.78633100 | 2.61554300  |
| C  | -1.81989600 | -1.02283900 | 1.59351500  |
| C  | -2.90061200 | -0.31758700 | 2.23989500  |
| C  | -1.88215500 | -1.63906800 | 3.83590200  |
| C  | -2.92183400 | -0.71220600 | 3.61136600  |
| Ir | -0.70347800 | 0.70336400  | 2.50482400  |
| C  | -1.63889100 | -1.20715400 | 0.11984000  |
| H  | -2.16175900 | -2.10699000 | -0.24999900 |
| H  | -2.01762100 | -0.34097600 | -0.43538300 |
| H  | -0.57621300 | -1.30410400 | -0.13808200 |
| C  | 0.05672700  | -2.63211800 | 2.44175700  |
| H  | 0.80147800  | -2.40705700 | 3.21872900  |
| H  | -0.16486900 | -3.71031200 | 2.50444400  |
| H  | 0.53926400  | -2.44074100 | 1.47542500  |
| C  | -1.46583300 | -2.23896800 | 5.13616200  |
| H  | -1.87861500 | -1.70976400 | 6.00621500  |
| H  | -1.75123600 | -3.30194300 | 5.20666600  |
| H  | -0.37249400 | -2.19267100 | 5.24765900  |
| C  | -3.88497400 | -0.19209500 | 4.62659900  |
| H  | -4.01934600 | 0.89315700  | 4.51301700  |
| H  | -4.88320600 | -0.64857000 | 4.51900800  |
| H  | -3.54045300 | -0.36340100 | 5.65479200  |
| C  | -3.97417200 | 0.46633900  | 1.55836300  |
| H  | -3.60193000 | 0.93257900  | 0.63790300  |
| H  | -4.84946200 | -0.15355500 | 1.29347300  |
| H  | -4.33843200 | 1.27718200  | 2.20325600  |
| C  | 3.45199900  | 0.99759900  | 1.72180000  |
| C  | 2.16971700  | 1.03763300  | 1.13432200  |
| H  | 4.42247400  | 1.05202500  | 1.23234300  |
| H  | 1.90850600  | 1.13606000  | 0.08712200  |
| N  | 2.07800700  | 0.85798500  | 3.30548300  |
| C  | 0.05835700  | 0.76419100  | 4.48287500  |
| C  | 1.46203800  | 0.75568300  | 4.56906300  |
| C  | -0.63903100 | 0.71255700  | 5.68738700  |

|   |             |            |            |
|---|-------------|------------|------------|
| C | 2.14237300  | 0.65854900 | 5.77645100 |
| C | 0.00040100  | 0.55835000 | 6.92448800 |
| H | -1.72626900 | 0.72427700 | 5.70616300 |
| C | 1.39515100  | 0.54995800 | 6.95231500 |
| H | 3.23238700  | 0.65576100 | 5.77867600 |
| H | 1.87210600  | 0.44223000 | 7.92613600 |
| H | -0.90626700 | 1.57912900 | 1.08156400 |
| C | -0.82843800 | 0.29723100 | 8.19530800 |
| O | -2.03902300 | 0.00957900 | 8.00119900 |
| O | -0.20848300 | 0.36894900 | 9.28099100 |
| C | 1.26893800  | 0.94344400 | 2.19690200 |
| N | 3.40513300  | 0.89041700 | 3.05027500 |

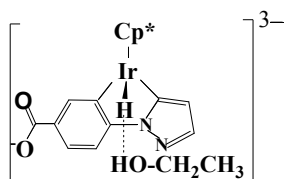

3-1

55

E=-1293.880615(au)

|    |             |             |             |
|----|-------------|-------------|-------------|
| C  | -0.72914300 | -2.28375000 | -1.87129400 |
| C  | -1.40324000 | -1.22582500 | -2.52919400 |
| C  | -2.37053400 | -0.67460200 | -1.63604200 |
| C  | -1.15441000 | -2.27630100 | -0.50663400 |
| C  | -2.23397700 | -1.34715600 | -0.36966100 |
| Ir | -0.42950600 | 0.09220100  | -0.44149400 |
| C  | -1.19832500 | -0.80050900 | -3.94634800 |
| H  | -1.81058100 | -1.38041300 | -4.65679400 |
| H  | -1.45741800 | 0.25680100  | -4.08242700 |
| H  | -0.14926100 | -0.91710900 | -4.24982900 |
| C  | 0.39816500  | -3.09934100 | -2.39729600 |
| H  | 0.28935100  | -4.16062200 | -2.12842600 |
| H  | 0.46330700  | -3.04050000 | -3.49189600 |
| H  | 1.36317700  | -2.75194300 | -1.99328300 |
| C  | -0.61255300 | -3.16863500 | 0.56038700  |
| H  | -0.86111600 | -2.78989700 | 1.55805200  |
| H  | -0.99503600 | -4.19955400 | 0.48278100  |
| H  | 0.48351400  | -3.21485500 | 0.50551100  |
| C  | -3.14604400 | -1.23648300 | 0.80705900  |
| H  | -3.63313400 | -0.25542200 | 0.84200300  |
| H  | -3.93295300 | -2.00832300 | 0.79117600  |
| H  | -2.59454500 | -1.33738400 | 1.74906700  |
| C  | -3.43322400 | 0.30638100  | -2.00795100 |
| H  | -3.03713100 | 1.10120900  | -2.65329400 |



|   |             |             |             |
|---|-------------|-------------|-------------|
| H | -4.27284900 | -0.17280900 | -2.53822200 |
| H | -3.83802300 | 0.80079300  | -1.11700800 |
| C | 3.74888300  | -0.23618900 | -1.52641800 |
| C | 2.44342500  | -0.34695300 | -2.04663700 |
| H | 4.69899700  | -0.30441800 | -2.05206900 |
| H | 2.14930200  | -0.52204800 | -3.07735800 |
| N | 2.43915500  | -0.01944200 | 0.10308500  |
| C | 0.48897500  | 0.37972100  | 1.36877400  |
| C | 1.89146700  | 0.23918400  | 1.37842600  |
| C | -0.12814600 | 0.57772600  | 2.60839000  |
| C | 2.64756300  | 0.31365200  | 2.54158900  |
| C | 0.60016400  | 0.63719000  | 3.80497500  |
| H | -1.20857500 | 0.69857100  | 2.68510700  |
| C | 1.98953600  | 0.51627600  | 3.75202000  |
| H | 3.72977400  | 0.20265400  | 2.47652600  |
| H | 2.52266000  | 0.58053900  | 4.69941200  |
| H | -1.50770400 | 1.24088500  | 0.15198600  |
| C | -0.10806400 | 0.82799200  | 5.16704500  |
| O | -1.35896600 | 0.87040400  | 5.13041400  |
| O | 0.65491300  | 0.91127100  | 6.15976000  |
| C | 1.58362800  | -0.20792300 | -0.95076300 |
| N | 3.75264700  | -0.02979400 | -0.20787400 |
| C | 1.25902700  | 3.28451100  | -1.68558400 |
| H | 1.11604700  | 4.34827000  | -1.45624400 |
| H | 1.18066400  | 2.71369800  | -0.74989700 |
| H | 2.27393400  | 3.13025300  | -2.07478000 |
| C | 0.21908500  | 2.80232400  | -2.67737200 |
| H | 0.41698800  | 1.74091300  | -2.91270900 |
| H | 0.29323500  | 3.36933500  | -3.61891700 |
| O | -1.10210200 | 2.97451900  | -2.21437900 |
| H | -1.20897000 | 2.37183400  | -1.44996300 |

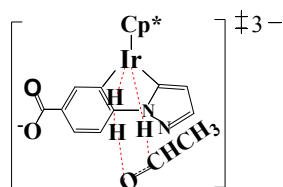

3-TS<sub>1-2</sub>

55 -396.11i cm<sup>-1</sup>

E=-1293.842444(au)

|   |             |             |            |
|---|-------------|-------------|------------|
| C | -1.15472200 | -1.91475100 | 2.53109500 |
| C | -1.57365300 | -0.85421100 | 1.64153800 |
| C | -2.61304400 | -0.10715000 | 2.29687800 |
| C | -1.83621600 | -1.75674700 | 3.74769200 |

|    |             |             |             |
|----|-------------|-------------|-------------|
| C  | -2.69913200 | -0.60302300 | 3.63361500  |
| Ir | -0.59462300 | 0.48544800  | 3.27197500  |
| C  | -1.17884000 | -0.74475800 | 0.20478400  |
| H  | -1.70867800 | -1.47578200 | -0.42891600 |
| H  | -1.39081500 | 0.25755100  | -0.18581500 |
| H  | -0.10169300 | -0.91999200 | 0.08003300  |
| C  | -0.07213300 | -2.88697700 | 2.20716600  |
| H  | 0.15654900  | -3.53451300 | 3.06096900  |
| H  | -0.33919000 | -3.53472500 | 1.35797000  |
| H  | 0.85682600  | -2.36275600 | 1.93807000  |
| C  | -1.68364800 | -2.56032700 | 4.99267300  |
| H  | -1.44105600 | -1.92977000 | 5.86156900  |
| H  | -2.61336900 | -3.09373900 | 5.23915900  |
| H  | -0.88627600 | -3.30610600 | 4.89746400  |
| C  | -3.68616400 | -0.15820900 | 4.66414300  |
| H  | -3.79948800 | 0.93280100  | 4.65465000  |
| H  | -4.68210500 | -0.59908300 | 4.49313500  |
| H  | -3.37176700 | -0.44161200 | 5.67647100  |
| C  | -3.52486400 | 0.89969300  | 1.66732800  |
| H  | -3.09628700 | 1.91805000  | 1.61330400  |
| H  | -3.78725800 | 0.58913000  | 0.64555000  |
| H  | -4.46010800 | 0.96514700  | 2.23848800  |
| C  | 3.53477300  | 0.55460900  | 2.28112400  |
| C  | 2.23032300  | 0.58136400  | 1.74304500  |
| H  | 4.48257400  | 0.55703800  | 1.74791100  |
| H  | 1.93413600  | 0.62888100  | 0.70051100  |
| N  | 2.23063000  | 0.56266200  | 3.92429000  |
| C  | 0.24096300  | 0.49337500  | 5.13172500  |
| C  | 1.65079600  | 0.48533500  | 5.19495700  |
| C  | -0.44984800 | 0.36603400  | 6.33849800  |
| C  | 2.34311800  | 0.38881600  | 6.39506200  |
| C  | 0.21054600  | 0.21622300  | 7.56019200  |
| H  | -1.53821000 | 0.35558000  | 6.37442200  |
| C  | 1.60759400  | 0.25028200  | 7.57225400  |
| H  | 3.43230600  | 0.39470400  | 6.38544800  |
| H  | 2.09017100  | 0.14032000  | 8.54269000  |
| H  | -1.42483300 | 2.49936300  | 3.61055500  |
| C  | -0.59420700 | -0.06930200 | 8.84640300  |
| O  | -1.81686800 | -0.28425600 | 8.67059600  |
| O  | 0.07116700  | -0.08139300 | 9.90736400  |
| C  | 1.37691200  | 0.59539500  | 2.84677200  |
| N  | 3.54512800  | 0.53463700  | 3.61470500  |
| C  | 0.40110000  | 3.81874700  | 0.90842500  |
| H  | 0.23308000  | 4.78625000  | 0.41351200  |

|   |             |            |             |
|---|-------------|------------|-------------|
| H | 0.73903500  | 4.01570400 | 1.93423500  |
| H | 1.20383200  | 3.27822000 | 0.38443200  |
| C | -0.89981700 | 3.01583500 | 0.96066300  |
| H | -0.60564400 | 2.03283400 | 1.47863100  |
| H | -1.16244000 | 2.68356000 | -0.08314900 |
| O | -1.90494000 | 3.63257300 | 1.59615500  |
| H | -1.67732000 | 3.02053000 | 2.98683400  |

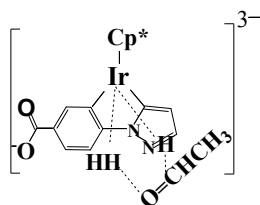

3-2

55

E=-1293.852296(au)

|    |             |             |             |
|----|-------------|-------------|-------------|
| C  | -1.30897300 | -1.96748100 | 2.02218300  |
| C  | -1.84898000 | -0.79357600 | 1.41178900  |
| C  | -2.73371100 | -0.17258400 | 2.34991500  |
| C  | -1.86166700 | -2.06760700 | 3.34456300  |
| C  | -2.71170900 | -0.93356100 | 3.55879300  |
| Ir | -0.47987600 | -0.19109600 | 3.28573700  |
| C  | -1.61511300 | -0.31614900 | 0.01584900  |
| H  | -2.34174500 | -0.75082000 | -0.69043200 |
| H  | -1.69918800 | 0.77896400  | -0.04149800 |
| H  | -0.61215300 | -0.59153500 | -0.33696700 |
| C  | -0.36993800 | -2.93168900 | 1.37786800  |
| H  | 0.23838100  | -3.45366700 | 2.12679500  |
| H  | -0.89327300 | -3.69355600 | 0.77846700  |
| H  | 0.32939200  | -2.40716800 | 0.71457800  |
| C  | -1.57575200 | -3.13136200 | 4.35162400  |
| H  | -1.46375600 | -2.70224700 | 5.35528900  |
| H  | -2.37855500 | -3.88410900 | 4.39822400  |
| H  | -0.64096400 | -3.65649600 | 4.12040600  |
| C  | -3.53089900 | -0.66322300 | 4.77708900  |
| H  | -3.62446500 | 0.41453000  | 4.95842900  |
| H  | -4.54760600 | -1.07888100 | 4.69471700  |
| H  | -3.07097900 | -1.08602600 | 5.67786000  |
| C  | -3.57718000 | 1.02101900  | 2.06274000  |
| H  | -2.99134800 | 1.82431000  | 1.59023000  |
| H  | -4.39707900 | 0.75598300  | 1.37481600  |
| H  | -4.03029100 | 1.41809300  | 2.97779100  |
| C  | 3.63083200  | 0.30479700  | 2.30047400  |
| C  | 2.37873900  | -0.10570900 | 1.78806100  |
| H  | 4.59009100  | 0.34248700  | 1.78939900  |

|   |             |             |            |
|---|-------------|-------------|------------|
| H | 2.14345900  | -0.43412400 | 0.78071000 |
| N | 2.25300100  | 0.51519200  | 3.86989800 |
| C | 0.22650300  | 0.48857700  | 5.05708900 |
| C | 1.62177000  | 0.75135000  | 5.10316400 |
| C | -0.47049000 | 0.64395900  | 6.26894800 |
| C | 2.27720900  | 1.15481300  | 6.25344800 |
| C | 0.15894300  | 1.03169400  | 7.45606000 |
| H | -1.54410700 | 0.46160000  | 6.33412100 |
| C | 1.53031700  | 1.29453700  | 7.42627800 |
| H | 3.35034300  | 1.33986900  | 6.22123800 |
| H | 1.98618900  | 1.60313800  | 8.36623600 |
| H | -2.22529700 | 3.16020500  | 3.94911800 |
| C | -0.62903600 | 1.14867600  | 8.78038400 |
| O | -1.83928800 | 0.83303300  | 8.71884000 |
| O | 0.03832900  | 1.53907700  | 9.76733700 |
| C | 1.47811300  | 0.04680200  | 2.84075300 |
| N | 3.56289100  | 0.68441800  | 3.57556500 |
| C | 0.65755100  | 3.35310300  | 2.11675100 |
| H | 0.95676100  | 4.21442100  | 1.50217600 |
| H | 0.13932600  | 3.73149000  | 3.00573100 |
| H | 1.55991700  | 2.81971300  | 2.44356000 |
| C | -0.26016500 | 2.43587700  | 1.30835500 |
| H | -0.48322000 | 1.52619700  | 2.06399600 |
| H | 0.35114100  | 1.87281000  | 0.54946400 |
| O | -1.37991400 | 2.95045300  | 0.86067400 |
| H | -2.12017900 | 3.26899200  | 3.21456700 |

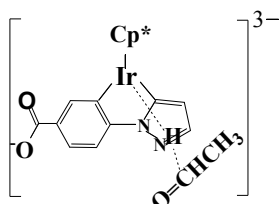

3-3

53

E=-1292.679118(au)

|    |             |             |             |
|----|-------------|-------------|-------------|
| C  | -1.01185100 | -2.06612100 | -1.54986700 |
| C  | -1.47902400 | -0.95484300 | -2.32404200 |
| C  | -2.35560300 | -0.18289900 | -1.49516300 |
| C  | -1.59957300 | -1.97771700 | -0.24377800 |
| C  | -2.40886400 | -0.79607000 | -0.20280600 |
| Ir | -0.15385100 | -0.16521600 | -0.50471200 |
| C  | -1.16951300 | -0.68071300 | -3.75937500 |
| H  | -1.91647700 | -1.13627900 | -4.43008000 |
| H  | -1.14289500 | 0.40109900  | -3.96528300 |

|   |             |             |             |
|---|-------------|-------------|-------------|
| H | -0.19064400 | -1.09650000 | -4.03370800 |
| C | -0.10831400 | -3.14850600 | -2.03682300 |
| H | 0.43048900  | -3.61826900 | -1.20518800 |
| H | -0.65705200 | -3.94134300 | -2.56982500 |
| H | 0.65001400  | -2.75079900 | -2.72225400 |
| C | -1.38438100 | -2.93257700 | 0.88284500  |
| H | -1.41113100 | -2.41938700 | 1.85090700  |
| H | -2.14578100 | -3.72757000 | 0.90244800  |
| H | -0.40060500 | -3.41200300 | 0.81022200  |
| C | -3.27085800 | -0.35236800 | 0.93252100  |
| H | -3.24423600 | 0.73751500  | 1.05097500  |
| H | -4.32234100 | -0.64443300 | 0.78359900  |
| H | -2.94120000 | -0.77750500 | 1.88698500  |
| C | -3.11385600 | 1.03002700  | -1.91548700 |
| H | -4.03453700 | 0.75203500  | -2.45484300 |
| H | -3.41534300 | 1.62207800  | -1.04239900 |
| H | -2.51763300 | 1.67748200  | -2.57862000 |
| C | 3.96228200  | 0.25404100  | -1.51723800 |
| C | 2.67900000  | -0.00772500 | -2.04863600 |
| H | 4.91328000  | 0.30000800  | -2.04300100 |
| H | 2.40632300  | -0.18717500 | -3.08338400 |
| N | 2.62622200  | 0.35140500  | 0.09722800  |
| C | 0.62943900  | 0.25014600  | 1.31817700  |
| C | 2.03375800  | 0.44875900  | 1.36486400  |
| C | -0.04080100 | 0.28885900  | 2.55319200  |
| C | 2.72412300  | 0.68857900  | 2.54127600  |
| C | 0.62227900  | 0.50836100  | 3.76382300  |
| H | -1.11971300 | 0.14585700  | 2.61913400  |
| C | 2.00377900  | 0.71443600  | 3.73784000  |
| H | 3.80297300  | 0.83589300  | 2.50689400  |
| H | 2.48780600  | 0.88563200  | 4.69869700  |
| C | -0.14384900 | 0.49549700  | 5.10557500  |
| O | -1.37147700 | 0.26037900  | 5.02383500  |
| O | 0.55485300  | 0.71250200  | 6.12344900  |
| C | 1.80562100  | 0.06237200  | -0.96441900 |
| N | 3.93945700  | 0.47217700  | -0.20331000 |
| C | 0.04407000  | 3.44032600  | -1.57320200 |
| H | 0.27737600  | 4.42487000  | -2.00366200 |
| H | -0.93600300 | 3.50598000  | -1.08097300 |
| H | 0.79352000  | 3.19172600  | -0.80904700 |
| C | 0.00051100  | 2.37139300  | -2.66709700 |
| H | -0.17005100 | 1.37633300  | -2.03581700 |
| H | 1.03882000  | 2.15958700  | -3.03724700 |
| O | -0.91346500 | 2.52043300  | -3.59980000 |

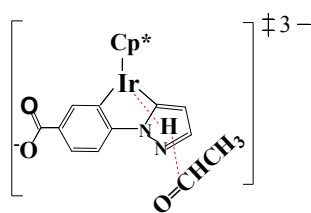

3-TS<sub>3.4</sub>

53 -116.71i cm<sup>-1</sup>

E=-1292.662625(au)

|    |             |             |             |
|----|-------------|-------------|-------------|
| C  | -1.32289800 | -1.90537300 | 2.12182000  |
| C  | -1.91333100 | -0.88536200 | 1.31445600  |
| C  | -2.83914500 | -0.16448800 | 2.10744600  |
| C  | -1.87003800 | -1.77841200 | 3.45801600  |
| C  | -2.73366500 | -0.64296400 | 3.45791500  |
| Ir | -0.37277400 | -0.11872700 | 3.24835100  |
| C  | -1.59976200 | -0.59551300 | -0.11834400 |
| H  | -2.34991100 | -1.02316900 | -0.80279300 |
| H  | -1.55872200 | 0.48881000  | -0.29582000 |
| H  | -0.62704200 | -1.01801800 | -0.40082900 |
| C  | -0.43872400 | -3.00989300 | 1.64718400  |
| H  | 0.22518600  | -3.35673700 | 2.44855700  |
| H  | -1.01150200 | -3.88061100 | 1.28625200  |
| H  | 0.20753900  | -2.67545700 | 0.82566400  |
| C  | -1.66397900 | -2.74535500 | 4.57780300  |
| H  | -1.77785300 | -2.25884800 | 5.55284400  |
| H  | -2.37935000 | -3.58235000 | 4.52948100  |
| H  | -0.65128800 | -3.16682400 | 4.55579800  |
| C  | -3.57026600 | -0.15280600 | 4.59403500  |
| H  | -3.54130600 | 0.94211800  | 4.66026500  |
| H  | -4.62644600 | -0.44895200 | 4.48323100  |
| H  | -3.21972300 | -0.53615900 | 5.55838400  |
| C  | -3.57800400 | 1.06239900  | 1.70910900  |
| H  | -3.70734500 | 1.12409800  | 0.62290000  |
| H  | -4.56922200 | 1.10594200  | 2.18245000  |
| H  | -3.02037400 | 1.96782900  | 1.99975400  |
| C  | 3.71410400  | 0.54694600  | 2.22272900  |
| C  | 2.45270800  | 0.19494400  | 1.69274000  |
| H  | 4.66059600  | 0.65902300  | 1.69888700  |
| H  | 2.19795200  | -0.01833100 | 0.65995700  |
| N  | 2.37521400  | 0.53863300  | 3.84011200  |
| C  | 0.39498900  | 0.31896400  | 5.08460000  |
| C  | 1.78066900  | 0.60562000  | 5.11489300  |
| C  | -0.27172800 | 0.34499300  | 6.31797500  |
| C  | 2.46336700  | 0.90267400  | 6.28299900  |

|   |             |            |            |
|---|-------------|------------|------------|
| C | 0.38508800  | 0.62457100 | 7.52214700 |
| H | -1.34091500 | 0.14227100 | 6.39195000 |
| C | 1.75130600  | 0.90696300 | 7.48476500 |
| H | 3.53079300  | 1.11697200 | 6.23795000 |
| H | 2.23078400  | 1.12363800 | 8.43855900 |
| C | -0.37481700 | 0.60412600 | 8.86793800 |
| O | -1.59033900 | 0.30971500 | 8.79841500 |
| O | 0.31576300  | 0.87907500 | 9.87769200 |
| C | 1.57690900  | 0.19327800 | 2.77942400 |
| N | 3.67423100  | 0.75775900 | 3.53812800 |
| C | 0.05929400  | 3.58572100 | 2.06855000 |
| H | 0.53348200  | 4.44811700 | 1.56924600 |
| H | -0.81921500 | 3.95369500 | 2.61069500 |
| H | 0.77154700  | 3.15745000 | 2.78299800 |
| C | -0.36042900 | 2.57426900 | 1.02621000 |
| H | -0.69675000 | 1.33355000 | 2.36479100 |
| H | 0.44577500  | 1.86800300 | 0.72666100 |
| O | -1.34877200 | 2.75277900 | 0.29683100 |

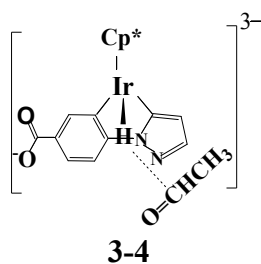

**53**

**E=-1292.663792(au)**

|    |             |             |             |
|----|-------------|-------------|-------------|
| C  | -1.05965800 | -1.97904300 | -1.53131700 |
| C  | -1.62923700 | -0.97294700 | -2.37137000 |
| C  | -2.64267200 | -0.29577700 | -1.64409300 |
| C  | -1.67448900 | -1.86221800 | -0.22211800 |
| C  | -2.55930800 | -0.74798700 | -0.27772000 |
| Ir | -0.17388300 | -0.19970500 | -0.40935100 |
| C  | -1.27042400 | -0.74074800 | -3.80422700 |
| H  | -1.86768400 | -1.36233800 | -4.49136000 |
| H  | -1.41881000 | 0.30903800  | -4.09024500 |
| H  | -0.21474400 | -0.98217700 | -3.98822100 |
| C  | -0.14264700 | -3.07178200 | -1.97044700 |
| H  | 0.43794200  | -3.46155200 | -1.12536900 |
| H  | -0.68597200 | -3.91729900 | -2.42545300 |
| H  | 0.58229900  | -2.70599500 | -2.70872200 |
| C  | -1.50972400 | -2.82470000 | 0.90777400  |
| H  | -1.68472200 | -2.34159900 | 1.87552000  |
| H  | -2.20438500 | -3.67606500 | 0.82279500  |

|   |             |             |             |
|---|-------------|-------------|-------------|
| H | -0.48817900 | -3.22318700 | 0.94319300  |
| C | -3.42792400 | -0.24049700 | 0.82618900  |
| H | -3.43733400 | 0.85663100  | 0.84233400  |
| H | -4.47185700 | -0.57822100 | 0.71686800  |
| H | -3.07283800 | -0.56794400 | 1.80920300  |
| C | -3.33949300 | 0.94808100  | -2.05637500 |
| H | -3.33961300 | 1.08430800  | -3.14394800 |
| H | -4.37905700 | 0.97435300  | -1.70032400 |
| H | -2.81791400 | 1.82666300  | -1.62831700 |
| C | 3.82811000  | 0.77740200  | -1.53271700 |
| C | 2.58346100  | 0.34120600  | -2.03635100 |
| H | 4.74446900  | 0.98517900  | -2.08065300 |
| H | 2.31824100  | 0.13809800  | -3.06906100 |
| N | 2.54940900  | 0.59935600  | 0.12451700  |
| C | 0.65033800  | 0.13003600  | 1.42947200  |
| C | 2.00420000  | 0.54233200  | 1.42358700  |
| C | 0.04099400  | 0.01966100  | 2.68704600  |
| C | 2.70742600  | 0.83649200  | 2.58059100  |
| C | 0.72133300  | 0.29045700  | 3.87967700  |
| H | -1.00080200 | -0.28872800 | 2.78762200  |
| C | 2.05231800  | 0.70480200  | 3.80695300  |
| H | 3.74811000  | 1.15183500  | 2.50811000  |
| H | 2.54914500  | 0.91275700  | 4.75372100  |
| C | 0.03021800  | 0.12468400  | 5.25189500  |
| O | -1.15011800 | -0.29336500 | 5.21817100  |
| O | 0.73440700  | 0.42315500  | 6.24587300  |
| C | 1.74389600  | 0.23118100  | -0.92367700 |
| N | 3.81566100  | 0.93498300  | -0.20889400 |
| C | 0.68490900  | 3.45089200  | -2.15911300 |
| H | 1.59754900  | 3.76225900  | -2.69167300 |
| H | 0.07049800  | 4.33492400  | -1.96194900 |
| H | 0.99976300  | 2.97551600  | -1.22443000 |
| C | -0.06182200 | 2.47605200  | -3.02320200 |
| H | -0.70996900 | 1.34636600  | -0.89674500 |
| H | 0.37345100  | 1.45571700  | -3.04402500 |
| O | -0.99815200 | 2.78080600  | -3.74627900 |

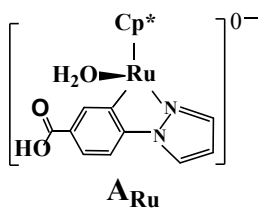

50

E=-1206.239655(au)



|   |             |             |             |
|---|-------------|-------------|-------------|
| C | -1.22286100 | -1.97009900 | 2.57400900  |
| C | -1.68159500 | -1.21648800 | 1.41849400  |
| C | -2.76584100 | -0.40442100 | 1.82727000  |
| C | -2.10281100 | -1.66053200 | 3.67620900  |
| C | -3.02208800 | -0.65584800 | 3.23741100  |
| C | -1.09522600 | -1.31115800 | 0.05072400  |
| H | -1.52080300 | -2.15374200 | -0.51176100 |
| H | -1.28037700 | -0.39997500 | -0.53112000 |
| H | -0.01032400 | -1.46834200 | 0.09250900  |
| C | -0.15448000 | -3.01039300 | 2.56429800  |
| H | 0.24534800  | -3.17108600 | 3.57185900  |
| H | -0.52366600 | -3.97693000 | 2.19123200  |
| H | 0.68694200  | -2.70792800 | 1.92893500  |
| C | -2.07855500 | -2.33065900 | 5.00685500  |
| H | -2.58697800 | -1.73822000 | 5.77496200  |
| H | -2.58176600 | -3.30601400 | 4.95891200  |
| H | -1.05216000 | -2.49888000 | 5.35145800  |
| C | -4.13488600 | -0.04613700 | 4.02184600  |
| H | -4.28424000 | 1.00409100  | 3.74240400  |
| H | -5.08821600 | -0.56737700 | 3.85262600  |
| H | -3.93118200 | -0.07059100 | 5.09838100  |
| C | -3.52780000 | 0.56989200  | 0.99522900  |
| H | -3.01766000 | 0.77632000  | 0.04770300  |
| H | -4.53270300 | 0.19369600  | 0.75725300  |
| H | -3.65094900 | 1.52678800  | 1.51714400  |
| C | 3.06254700  | 1.23659500  | 2.80037000  |
| C | 2.90195200  | 1.22994400  | 1.43131300  |
| C | 1.56052800  | 0.87041400  | 1.22613100  |
| N | 0.94299800  | 0.66617600  | 2.38984300  |
| H | 3.92662400  | 1.45583000  | 3.41223300  |
| H | 3.65156600  | 1.44848400  | 0.68459100  |
| H | 1.00974800  | 0.73624700  | 0.30309500  |
| N | 1.87009500  | 0.90025300  | 3.35101800  |
| C | 0.07564900  | 0.39380000  | 4.83569500  |
| C | 1.42740800  | 0.78143500  | 4.69446000  |
| C | -0.36552900 | 0.35702900  | 6.16647800  |
| C | 2.29018100  | 1.06267400  | 5.74812000  |
| C | 0.46826400  | 0.61914500  | 7.25870400  |
| H | -1.40136000 | 0.10042900  | 6.39145600  |
| C | 1.80546100  | 0.97064900  | 7.04571200  |
| H | 3.32044900  | 1.36907800  | 5.57468100  |
| H | 2.45931500  | 1.23882100  | 7.87461500  |
| C | -0.12532500 | 0.54515900  | 8.62194700  |
| O | -1.30020100 | 0.67740900  | 8.85357900  |

|    |             |            |            |
|----|-------------|------------|------------|
| O  | 0.74153400  | 0.31107900 | 9.63637600 |
| H  | 1.60302200  | 0.06524300 | 9.27786300 |
| O  | -1.38405300 | 2.38970300 | 3.24976700 |
| H  | -0.56308100 | 2.81227800 | 2.96679000 |
| H  | -1.38364800 | 2.45374500 | 4.21465000 |
| Ru | -0.99470900 | 0.08189200 | 3.07195800 |

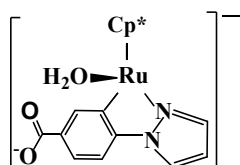

**B<sub>Ru</sub>**

**49**

**E=-1205.781482(au)**

|   |             |             |             |
|---|-------------|-------------|-------------|
| C | -1.20920100 | -1.96556500 | 2.36124700  |
| C | -1.79582300 | -1.13304200 | 1.32238500  |
| C | -2.81392500 | -0.35651300 | 1.93175600  |
| C | -1.94974500 | -1.75270800 | 3.58256000  |
| C | -2.92288900 | -0.72730200 | 3.33341500  |
| C | -1.38702500 | -1.12342600 | -0.11230800 |
| H | -1.89399700 | -1.90798800 | -0.69509100 |
| H | -1.61333100 | -0.16096600 | -0.58863000 |
| H | -0.30739800 | -1.29399900 | -0.21927700 |
| C | -0.13502500 | -2.97985400 | 2.15221300  |
| H | 0.40943400  | -3.16952700 | 3.08424700  |
| H | -0.53646800 | -3.94031900 | 1.79378400  |
| H | 0.60049900  | -2.63388900 | 1.41499500  |
| C | -1.76263900 | -2.50343700 | 4.85655000  |
| H | -2.04697100 | -1.90399300 | 5.72771200  |
| H | -2.36786900 | -3.42151300 | 4.86506700  |
| H | -0.71387900 | -2.78559200 | 5.00183600  |
| C | -3.93680700 | -0.19332600 | 4.28911200  |
| H | -4.10947500 | 0.87769700  | 4.11905900  |
| H | -4.90881700 | -0.70171300 | 4.19463300  |
| H | -3.60554500 | -0.30041900 | 5.32836800  |
| C | -3.65247900 | 0.69053200  | 1.28020400  |
| H | -3.21572200 | 1.02759700  | 0.33278500  |
| H | -4.66848700 | 0.32364100  | 1.07170300  |
| H | -3.74767500 | 1.57126000  | 1.92682700  |
| C | 3.18719800  | 0.94617000  | 2.92364100  |
| C | 3.11256200  | 0.86742600  | 1.54327700  |
| C | 1.76656800  | 0.59239900  | 1.27344500  |
| N | 1.06665400  | 0.50493000  | 2.40988400  |
| H | 4.02196100  | 1.13890600  | 3.58331200  |

|    |             |            |            |
|----|-------------|------------|------------|
| H  | 3.92140700  | 0.98927300 | 0.83658500 |
| H  | 1.25925400  | 0.44327600 | 0.32716100 |
| N  | 1.94680900  | 0.73000300 | 3.41267800 |
| C  | 0.05086700  | 0.38082500 | 4.81521000 |
| C  | 1.41383300  | 0.72143400 | 4.73782100 |
| C  | -0.49756700 | 0.46082500 | 6.10444900 |
| C  | 2.20213300  | 1.06291900 | 5.83593500 |
| C  | 0.24551600  | 0.80624200 | 7.23601800 |
| H  | -1.55293300 | 0.24508100 | 6.28809200 |
| C  | 1.60439900  | 1.09438600 | 7.08922700 |
| H  | 3.25805300  | 1.31445700 | 5.71706600 |
| H  | 2.15195200  | 1.35557000 | 7.99280000 |
| C  | -0.42039200 | 0.88147800 | 8.63294500 |
| O  | -1.64287400 | 0.62254000 | 8.64826800 |
| O  | 0.35351700  | 1.19606000 | 9.56205100 |
| O  | -1.20708800 | 2.37510200 | 3.25695900 |
| H  | -0.31775300 | 2.68999900 | 3.05042900 |
| H  | -1.20014000 | 2.27453700 | 4.22436900 |
| Ru | -0.93229800 | 0.03675100 | 3.00671900 |

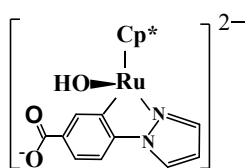

$C_{Ru}$

48

$E=-1205.293392(\text{au})$

|   |             |             |             |
|---|-------------|-------------|-------------|
| C | -1.22835400 | -2.02861300 | 2.31297300  |
| C | -1.81976200 | -1.14839000 | 1.31591900  |
| C | -2.78313500 | -0.34311000 | 1.98265900  |
| C | -1.88576900 | -1.78952800 | 3.57111200  |
| C | -2.84426000 | -0.71989000 | 3.37537400  |
| C | -1.47724000 | -1.11850800 | -0.13625200 |
| H | -2.10831200 | -1.78870900 | -0.74802600 |
| H | -1.57577800 | -0.10496700 | -0.54768900 |
| H | -0.43586600 | -1.43001500 | -0.30083000 |
| C | -0.21126200 | -3.08233800 | 2.02390900  |
| H | 0.30637000  | -3.38718800 | 2.94157100  |
| H | -0.64774000 | -3.98850500 | 1.56575100  |
| H | 0.56046200  | -2.70779200 | 1.33613800  |
| C | -1.69353900 | -2.55666900 | 4.83598700  |
| H | -1.73173800 | -1.89705400 | 5.71192300  |
| H | -2.45832900 | -3.34017300 | 4.96684100  |
| H | -0.70794700 | -3.03867200 | 4.85607700  |

|    |             |             |            |
|----|-------------|-------------|------------|
| C  | -3.80104500 | -0.17049300 | 4.37920200 |
| H  | -3.88631400 | 0.91942400  | 4.27568700 |
| H  | -4.81503800 | -0.59909500 | 4.28654900 |
| H  | -3.45453800 | -0.36215800 | 5.40204100 |
| C  | -3.52613600 | 0.81365600  | 1.40143900 |
| H  | -3.49356800 | 0.80664500  | 0.30410600 |
| H  | -4.58247800 | 0.81128000  | 1.70740400 |
| H  | -3.04374000 | 1.73887400  | 1.76362500 |
| C  | 3.19260200  | 1.13816300  | 3.00275800 |
| C  | 3.18176400  | 0.93193900  | 1.63440200 |
| C  | 1.89198600  | 0.45620800  | 1.35302700 |
| N  | 1.16999000  | 0.36263500  | 2.47400200 |
| H  | 3.95763200  | 1.51639400  | 3.66724900 |
| H  | 3.99223400  | 1.11091300  | 0.93926200 |
| H  | 1.43780000  | 0.18541500  | 0.40705000 |
| N  | 1.96902400  | 0.79242200  | 3.47290800 |
| C  | 0.03785800  | 0.44339700  | 4.81814900 |
| C  | 1.39698200  | 0.81099800  | 4.77358400 |
| C  | -0.51761700 | 0.48527300  | 6.11372500 |
| C  | 2.16406600  | 1.15135000  | 5.88959300 |
| C  | 0.20441800  | 0.81009000  | 7.26476500 |
| H  | -1.57366200 | 0.25574100  | 6.26866500 |
| C  | 1.55853200  | 1.14419200  | 7.13726600 |
| H  | 3.21972100  | 1.41744200  | 5.78547800 |
| H  | 2.09544100  | 1.39677300  | 8.05005000 |
| C  | -0.44737700 | 0.80371800  | 8.66798100 |
| O  | -1.65244100 | 0.46707700  | 8.71261800 |
| O  | 0.31154700  | 1.13481000  | 9.61209100 |
| O  | -1.08244700 | 2.07812700  | 2.72100300 |
| H  | -0.94523300 | 2.44644200  | 3.60036700 |
| Ru | -0.83683800 | -0.01092500 | 2.99229500 |

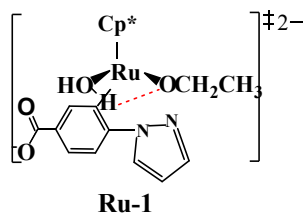

**57**

**E=-1360.275796(au)**

|   |             |             |            |
|---|-------------|-------------|------------|
| C | -1.00414000 | -1.61282700 | 1.97084400 |
| C | -2.10051600 | -0.90425800 | 1.33082700 |
| C | -3.07189000 | -0.61806800 | 2.32848800 |
| C | -1.36627800 | -1.83704900 | 3.35618600 |
| C | -2.62889300 | -1.19758700 | 3.59173200 |

|   |             |             |             |
|---|-------------|-------------|-------------|
| C | -2.08388300 | -0.44003100 | -0.08608700 |
| H | -2.12023000 | -1.27599400 | -0.80374500 |
| H | -2.93386000 | 0.22099300  | -0.29624700 |
| H | -1.17472500 | 0.14735700  | -0.27972400 |
| C | 0.14982000  | -2.21619700 | 1.24534100  |
| H | 0.99462800  | -2.37402000 | 1.92272800  |
| H | -0.12156600 | -3.18368000 | 0.78607800  |
| H | 0.49534900  | -1.55369100 | 0.44046700  |
| C | -0.56779100 | -2.61594400 | 4.34692500  |
| H | -0.76257700 | -2.26460000 | 5.36720100  |
| H | -0.80662300 | -3.69171400 | 4.30569700  |
| H | 0.50596200  | -2.48383900 | 4.16594400  |
| C | -3.40252900 | -1.16724000 | 4.86652300  |
| H | -3.94943200 | -0.22091200 | 4.96806900  |
| H | -4.13574700 | -1.98895800 | 4.93491000  |
| H | -2.73873500 | -1.22855200 | 5.73626200  |
| C | -4.32410900 | 0.17468900  | 2.16401800  |
| H | -4.29051200 | 0.78185500  | 1.25088400  |
| H | -5.21992900 | -0.46610300 | 2.11901000  |
| H | -4.44254100 | 0.87331800  | 3.00043800  |
| C | 3.40471700  | 0.86952200  | 3.37418100  |
| C | 4.18009800  | 0.03876100  | 2.58894200  |
| C | 3.51910600  | -1.19847300 | 2.66515000  |
| N | 2.43863000  | -1.13892100 | 3.44192100  |
| H | 3.48579500  | 1.92012400  | 3.62333800  |
| H | 5.06738900  | 0.30019700  | 2.02682100  |
| H | 3.77731600  | -2.13814500 | 2.18547800  |
| N | 2.37241200  | 0.13850400  | 3.85455800  |
| C | 0.05127300  | 0.69370300  | 4.63733200  |
| C | 1.43708600  | 0.58967000  | 4.86762700  |
| C | -0.65069300 | 1.13683900  | 5.79334700  |
| C | 2.05655300  | 0.91986100  | 6.08278300  |
| C | -0.07648000 | 1.48546300  | 7.01703300  |
| H | -1.74137900 | 1.21032100  | 5.77639100  |
| C | 1.30905900  | 1.37792200  | 7.15273000  |
| H | 3.13907800  | 0.79242200  | 6.16644600  |
| H | 1.74947700  | 1.64468500  | 8.11168400  |
| C | -0.93485200 | 1.96943300  | 8.21125400  |
| O | -2.16924500 | 2.02232000  | 8.01153900  |
| O | -0.28999200 | 2.25596800  | 9.24858200  |
| O | -2.28192000 | 2.46319000  | 3.50204400  |
| H | -1.80492400 | 2.58683300  | 4.33400800  |
| C | 1.58081800  | 1.59481900  | 0.64546700  |
| H | 1.59550000  | 0.53872500  | 0.94672900  |

|    |             |            |             |
|----|-------------|------------|-------------|
| H  | 1.12721100  | 1.65342600 | -0.35555900 |
| H  | 2.62091300  | 1.95091500 | 0.58756400  |
| C  | 0.74165500  | 2.39188500 | 1.63801100  |
| H  | 1.25883300  | 2.37980600 | 2.62271300  |
| H  | 0.75491300  | 3.45865600 | 1.30686700  |
| O  | -0.54325400 | 1.91754600 | 1.71361400  |
| H  | -1.59695100 | 2.56966200 | 2.78036700  |
| Ru | -1.19396700 | 0.24726200 | 2.96014300  |

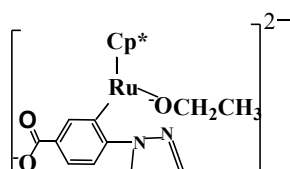

Ru-2

54

E=-1283.84222(au)

|   |             |             |             |
|---|-------------|-------------|-------------|
| C | -1.27540600 | -1.99907300 | 2.42843200  |
| C | -2.13064100 | -1.30748700 | 1.46926600  |
| C | -3.13799700 | -0.62709800 | 2.20798000  |
| C | -1.81723200 | -1.81089700 | 3.74579800  |
| C | -2.92551200 | -0.90313800 | 3.62525500  |
| C | -1.88368000 | -1.22661500 | 0.00120300  |
| H | -2.28815100 | -2.08595100 | -0.55996400 |
| H | -2.31885900 | -0.30927000 | -0.41510000 |
| H | -0.80433200 | -1.17023900 | -0.19672300 |
| C | -0.12104600 | -2.87749700 | 2.08400600  |
| H | 0.64273200  | -2.83536100 | 2.86744400  |
| H | -0.43268600 | -3.92747700 | 1.94647700  |
| H | 0.36977500  | -2.54227000 | 1.16207700  |
| C | -1.29283400 | -2.40688000 | 5.00977400  |
| H | -1.49266700 | -1.76229700 | 5.87531700  |
| H | -1.73178200 | -3.39753800 | 5.21089300  |
| H | -0.20235400 | -2.52090900 | 4.96059300  |
| C | -3.82086200 | -0.44502700 | 4.72823200  |
| H | -4.17586200 | 0.57707900  | 4.54274500  |
| H | -4.70858200 | -1.09332800 | 4.82278300  |
| H | -3.31096100 | -0.43049300 | 5.69952200  |
| C | -4.19071400 | 0.28248600  | 1.67248600  |
| H | -3.94898600 | 0.60648100  | 0.65289300  |
| H | -5.18919300 | -0.18558700 | 1.65532500  |
| H | -4.25465000 | 1.19068500  | 2.28637800  |
| C | 3.13733800  | 1.46322400  | 2.82531900  |
| C | 3.68949900  | 0.97778800  | 1.65504900  |
| C | 3.04852700  | -0.26040900 | 1.47507800  |

|    |             |             |            |
|----|-------------|-------------|------------|
| N  | 2.18764300  | -0.52300700 | 2.45685400 |
| H  | 3.27144500  | 2.39301800  | 3.36433400 |
| H  | 4.41997800  | 1.46225600  | 1.01961000 |
| H  | 3.17642000  | -0.98316400 | 0.67478600 |
| N  | 2.24826900  | 0.54430800  | 3.26957900 |
| C  | 0.07704500  | 0.59230700  | 4.46299900 |
| C  | 1.48170200  | 0.64020700  | 4.49178900 |
| C  | -0.50376400 | 0.72805900  | 5.74550500 |
| C  | 2.23442500  | 0.80539400  | 5.66376400 |
| C  | 0.19823400  | 0.85650000  | 6.94137100 |
| H  | -1.58743500 | 0.70957700  | 5.84760300 |
| C  | 1.59436600  | 0.91427500  | 6.88897500 |
| H  | 3.32565900  | 0.81290600  | 5.59264200 |
| H  | 2.13499200  | 1.02090000  | 7.82816900 |
| C  | -0.54128400 | 0.86144900  | 8.29705500 |
| O  | -1.76085600 | 0.56993300  | 8.25036400 |
| O  | 0.16445300  | 1.13442100  | 9.29735700 |
| C  | 0.73800100  | 3.27744100  | 0.92239400 |
| H  | 1.41907500  | 2.45170100  | 0.67532200 |
| H  | 0.12634900  | 3.49116900  | 0.03437900 |
| H  | 1.34124900  | 4.16947200  | 1.15691800 |
| C  | -0.15168200 | 2.86676900  | 2.09100300 |
| H  | 0.49155200  | 2.70296600  | 2.97910700 |
| H  | -0.79981700 | 3.73731500  | 2.35167600 |
| O  | -0.90595200 | 1.76478400  | 1.76374300 |
| Ru | -1.19717100 | 0.07706000  | 2.87012800 |

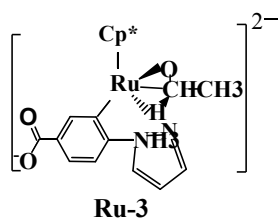

**54**

**E=-1283.837452(au)**

|   |             |             |             |
|---|-------------|-------------|-------------|
| C | -0.37834900 | -1.83761600 | -1.59902300 |
| C | -1.44112300 | -1.21098700 | -2.36917700 |
| C | -2.45852100 | -0.80083600 | -1.46373900 |
| C | -0.78108900 | -1.86269800 | -0.22438000 |
| C | -2.05469200 | -1.18337300 | -0.11853500 |
| C | -1.42229000 | -1.04502100 | -3.85207900 |
| H | -1.61127700 | -1.99429800 | -4.38191500 |
| H | -2.18247500 | -0.32670400 | -4.18510500 |
| H | -0.44721900 | -0.67046200 | -4.19591700 |
| C | 0.84477000  | -2.46589900 | -2.17999900 |

|    |             |             |             |
|----|-------------|-------------|-------------|
| H  | 1.65510900  | -2.51107700 | -1.44237600 |
| H  | 0.65408800  | -3.49072900 | -2.54549500 |
| H  | 1.22510700  | -1.87818300 | -3.02651500 |
| C  | -0.05958300 | -2.51399500 | 0.90798800  |
| H  | -0.20592900 | -1.95358500 | 1.83919700  |
| H  | -0.42241700 | -3.54228700 | 1.06817800  |
| H  | 1.02189200  | -2.55488900 | 0.73016600  |
| C  | -2.87670300 | -1.03283700 | 1.11866400  |
| H  | -3.59450100 | -0.20999400 | 1.01015700  |
| H  | -3.45090800 | -1.94763500 | 1.34497500  |
| H  | -2.26770200 | -0.78662000 | 1.99782800  |
| C  | -3.69629200 | -0.03410800 | -1.78613700 |
| H  | -3.63677900 | 0.40940900  | -2.78827100 |
| H  | -4.60482100 | -0.65595600 | -1.74063700 |
| H  | -3.81406100 | 0.79849100  | -1.08091800 |
| C  | 3.04995800  | 0.57614500  | -1.05141300 |
| C  | 3.97531300  | -0.13122300 | -1.79785800 |
| C  | 4.17751300  | -1.30456900 | -1.05362000 |
| N  | 3.43835000  | -1.32471000 | 0.05696300  |
| H  | 2.59061700  | 1.54592400  | -1.19048900 |
| H  | 4.43120600  | 0.16601600  | -2.73368900 |
| H  | 4.82601200  | -2.14657700 | -1.27687900 |
| N  | 2.75338500  | -0.16344100 | 0.03840000  |
| C  | 0.54578000  | 0.61003700  | 0.86047800  |
| C  | 1.87031500  | 0.21464400  | 1.11958800  |
| C  | -0.17659200 | 0.96920200  | 2.02179400  |
| C  | 2.41847000  | 0.12898500  | 2.40524200  |
| C  | 0.31091800  | 0.85306400  | 3.32500500  |
| H  | -1.21053400 | 1.30200000  | 1.92055300  |
| C  | 1.63448000  | 0.43443000  | 3.50488700  |
| H  | 3.45549500  | -0.19395500 | 2.51280700  |
| H  | 2.00704600  | 0.37101600  | 4.52605800  |
| C  | -0.58269700 | 1.11990600  | 4.55710500  |
| O  | -1.80948200 | 1.22830500  | 4.32681800  |
| O  | 0.01980100  | 1.17685300  | 5.65663300  |
| C  | -0.38397300 | 2.77556900  | -3.16964800 |
| H  | -1.10039200 | 2.06894200  | -3.60854200 |
| H  | -0.83659900 | 3.77607400  | -3.18925700 |
| H  | 0.52861100  | 2.78997500  | -3.78674300 |
| C  | -0.10005200 | 2.36556500  | -1.72508700 |
| H  | 0.51971900  | 1.36486900  | -1.84188000 |
| H  | 0.69368800  | 3.03454400  | -1.29677000 |
| O  | -1.19196100 | 2.24960400  | -0.95656400 |
| Ru | -0.60661900 | 0.18069000  | -0.85605300 |



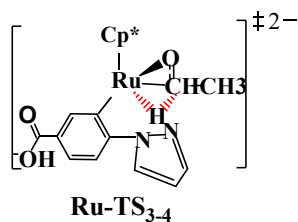

**54 -648.80i cm<sup>-1</sup>**

**E=-1283.827457(au)**

|   |             |             |             |
|---|-------------|-------------|-------------|
| C | -0.91832000 | -1.55223700 | 2.13027600  |
| C | -1.98309400 | -0.92224500 | 1.37544400  |
| C | -2.98053100 | -0.51280400 | 2.30767100  |
| C | -1.30881200 | -1.58813200 | 3.50987900  |
| C | -2.58394300 | -0.93812100 | 3.63700600  |
| C | -2.00928900 | -0.77518400 | -0.10925700 |
| H | -2.29009400 | -1.71090300 | -0.62285900 |
| H | -2.72574100 | -0.00466500 | -0.42409900 |
| H | -1.02494400 | -0.47526500 | -0.49616100 |
| C | 0.30413200  | -2.18126000 | 1.54611600  |
| H | 1.13790500  | -2.16262600 | 2.25882000  |
| H | 0.13074400  | -3.23031600 | 1.24771800  |
| H | 0.63904600  | -1.63381100 | 0.65503800  |
| C | -0.56157900 | -2.23668600 | 4.62740700  |
| H | -0.70739900 | -1.68739600 | 5.56543000  |
| H | -0.90353300 | -3.27285700 | 4.78179700  |
| H | 0.51808900  | -2.25567000 | 4.43593300  |
| C | -3.39122500 | -0.79937800 | 4.88614900  |
| H | -4.12596400 | 0.00976300  | 4.78585900  |
| H | -3.94815300 | -1.72082200 | 5.12913600  |
| H | -2.77574300 | -0.53809000 | 5.75708100  |
| C | -4.22952100 | 0.24738100  | 2.00716500  |
| H | -4.19852900 | 0.68110100  | 0.99956300  |
| H | -5.13213900 | -0.38040900 | 2.07839600  |
| H | -4.33908500 | 1.08291700  | 2.71022300  |
| C | 2.63361500  | 0.91049200  | 2.69617500  |
| C | 3.55873500  | 0.20133200  | 1.95177000  |
| C | 3.70906400  | -0.99998500 | 2.66360600  |
| N | 2.94173300  | -1.03289400 | 3.75412100  |
| H | 2.20272200  | 1.89570500  | 2.57218400  |
| H | 4.04602800  | 0.51350500  | 1.03686400  |
| H | 4.34026900  | -1.85249600 | 2.43079600  |
| N | 2.28890400  | 0.14738000  | 3.75450100  |
| C | 0.06061700  | 0.88761400  | 4.57552000  |
| C | 1.39403400  | 0.51564800  | 4.82897800  |
| C | -0.66267600 | 1.23637400  | 5.73993900  |

|    |             |            |             |
|----|-------------|------------|-------------|
| C  | 1.94340100  | 0.43715600 | 6.11534500  |
| C  | -0.16854200 | 1.13443000 | 7.04147100  |
| H  | -1.70286000 | 1.55067100 | 5.64345100  |
| C  | 1.16093500  | 0.73400500 | 7.21782400  |
| H  | 2.98451200  | 0.12603600 | 6.21963600  |
| H  | 1.53843500  | 0.67681300 | 8.23751200  |
| C  | -1.06055000 | 1.39990300 | 8.27539700  |
| O  | -2.28831700 | 1.50328000 | 8.04859400  |
| O  | -0.45476700 | 1.46271900 | 9.37278700  |
| C  | -0.90430700 | 2.74378000 | 0.58313500  |
| H  | -1.76322200 | 2.14975300 | 0.24700000  |
| H  | -1.12528400 | 3.80723500 | 0.40189100  |
| H  | -0.02441200 | 2.46210900 | -0.01488300 |
| C  | -0.67382200 | 2.50244700 | 2.06782700  |
| H  | 0.13419800  | 1.23464800 | 2.01558100  |
| H  | 0.22882400  | 3.05449200 | 2.42823400  |
| O  | -1.71997000 | 2.56667800 | 2.85462500  |
| Ru | -1.09544400 | 0.49426700 | 2.87160000  |

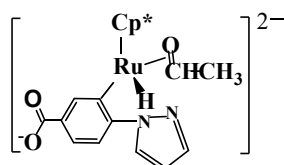

Ru-4

54

E=-1283.835304(au)

|   |             |             |             |
|---|-------------|-------------|-------------|
| C | -0.55033300 | -1.92441000 | -1.15003400 |
| C | -1.34191700 | -1.29987200 | -2.19733000 |
| C | -2.45535000 | -0.67006000 | -1.56574200 |
| C | -1.24525500 | -1.75441200 | 0.09814700  |
| C | -2.37686900 | -0.94394400 | -0.14106500 |
| C | -1.08633400 | -1.41991400 | -3.66397900 |
| H | -1.48839700 | -2.35750100 | -4.08604200 |
| H | -1.53785900 | -0.58670500 | -4.21778800 |
| H | -0.01021900 | -1.39491300 | -3.87425500 |
| C | 0.65775200  | -2.78090300 | -1.35292400 |
| H | 1.36102300  | -2.68073400 | -0.51752600 |
| H | 0.40017000  | -3.84957000 | -1.45290300 |
| H | 1.20701500  | -2.47849400 | -2.25323500 |
| C | -0.80598500 | -2.31340200 | 1.41111900  |
| H | -1.16490700 | -1.72400300 | 2.26580800  |
| H | -1.16460200 | -3.34867300 | 1.52712100  |
| H | 0.28833100  | -2.33267500 | 1.48197100  |
| C | -3.32829000 | -0.41611900 | 0.88436400  |

|    |             |             |             |
|----|-------------|-------------|-------------|
| H  | -3.57617000 | 0.63197800  | 0.66864500  |
| H  | -4.27283400 | -0.98414300 | 0.89720300  |
| H  | -2.89697400 | -0.43707600 | 1.89501200  |
| C  | -3.59091500 | 0.04878000  | -2.21433300 |
| H  | -3.39695100 | 0.22636100  | -3.28031900 |
| H  | -4.53511100 | -0.51601400 | -2.14021600 |
| H  | -3.75709000 | 1.02762800  | -1.74306000 |
| C  | 3.16029200  | 1.05638500  | -1.22147300 |
| C  | 4.12318000  | 0.56915500  | -2.08494600 |
| C  | 4.52366100  | -0.64046500 | -1.49149400 |
| N  | 3.86868000  | -0.88135200 | -0.35629800 |
| H  | 2.54157400  | 1.94418100  | -1.24390000 |
| H  | 4.47085900  | 1.02163200  | -3.00484000 |
| H  | 5.26763900  | -1.35204600 | -1.83797700 |
| N  | 3.03836000  | 0.17071200  | -0.20960700 |
| C  | 0.77774900  | 0.54993500  | 0.73721600  |
| C  | 2.14741900  | 0.28244500  | 0.91639900  |
| C  | 0.05625700  | 0.66476600  | 1.94450300  |
| C  | 2.72725200  | 0.08619700  | 2.17768800  |
| C  | 0.57116800  | 0.38509900  | 3.20733600  |
| H  | -1.01104500 | 0.87889400  | 1.89790300  |
| C  | 1.94001700  | 0.11822400  | 3.31816000  |
| H  | 3.79720700  | -0.12112400 | 2.22846700  |
| H  | 2.34647200  | -0.07023200 | 4.31091400  |
| C  | -0.36186500 | 0.22766800  | 4.42047400  |
| O  | -1.56879000 | -0.00310900 | 4.14273700  |
| O  | 0.18053300  | 0.29932400  | 5.54638100  |
| C  | -1.02331000 | 2.52228500  | -2.93818500 |
| H  | -1.98124100 | 2.00788900  | -3.08392700 |
| H  | -1.19925600 | 3.60599600  | -3.06971300 |
| H  | -0.32690500 | 2.19387300  | -3.72336100 |
| C  | -0.45755600 | 2.20756900  | -1.56911900 |
| H  | 0.84867400  | 0.23381200  | -1.70331500 |
| H  | 0.53302300  | 2.68638900  | -1.40866400 |
| O  | -1.26144400 | 2.19463800  | -0.52579900 |
| Ru | -0.51929100 | 0.25154700  | -0.86415500 |

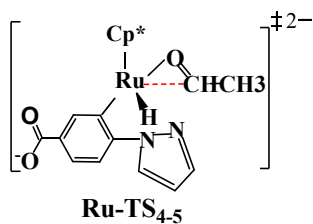

**54** -101.23i cm<sup>-1</sup>  
**E=-1283.803339(au)**

|   |             |             |             |
|---|-------------|-------------|-------------|
| C | -0.22440900 | -1.98282500 | -1.51626800 |
| C | -1.25138400 | -1.44044100 | -2.39188100 |
| C | -2.36959200 | -1.09528700 | -1.57936800 |
| C | -0.78130800 | -2.03411500 | -0.17484300 |
| C | -2.09821100 | -1.49132800 | -0.20552500 |
| C | -1.13737800 | -1.31782300 | -3.87471100 |
| H | -1.36104500 | -2.26482500 | -4.39833100 |
| H | -1.82179400 | -0.55186400 | -4.26219900 |
| H | -0.12320600 | -1.01048900 | -4.15859800 |
| C | 1.03443900  | -2.64081500 | -1.96961100 |
| H | 1.81665300  | -2.59342000 | -1.20285400 |
| H | 0.87430600  | -3.70425000 | -2.22546300 |
| H | 1.44148000  | -2.14130400 | -2.85821200 |
| C | -0.08046400 | -2.58600400 | 1.02292700  |
| H | -0.38621500 | -2.06770500 | 1.94003700  |
| H | -0.28094000 | -3.66214600 | 1.14967700  |
| H | 1.00467200  | -2.44799100 | 0.94434400  |
| C | -3.03936900 | -1.32484100 | 0.93961200  |
| H | -3.59143800 | -0.37844700 | 0.85965500  |
| H | -3.78458100 | -2.13736900 | 1.00362300  |
| H | -2.50331900 | -1.28663800 | 1.89492100  |
| C | -3.63822300 | -0.45201200 | -2.02958100 |
| H | -3.51437200 | 0.00729400  | -3.01869900 |
| H | -4.47608100 | -1.16758900 | -2.08624500 |
| H | -3.92881500 | 0.35089000  | -1.33978500 |
| C | 2.96785700  | -0.01576000 | -1.11813300 |
| C | 4.03056000  | -0.74243100 | -1.62531800 |
| C | 4.45459800  | -1.52888400 | -0.54195800 |
| N | 3.72199300  | -1.31033600 | 0.54982600  |
| H | 2.25143600  | 0.66826500  | -1.56232400 |
| H | 4.41658000  | -0.71691900 | -2.63684100 |
| H | 5.26105200  | -2.25601100 | -0.50287300 |
| N | 2.81699600  | -0.37920000 | 0.17565100  |
| C | 0.57836100  | 0.53101100  | 0.79196200  |
| C | 1.90205300  | 0.19485000  | 1.14002900  |
| C | -0.14704800 | 1.10566100  | 1.86897000  |
| C | 2.43671600  | 0.38087600  | 2.42186000  |
| C | 0.34686400  | 1.31907500  | 3.15665900  |
| H | -1.19318300 | 1.38751700  | 1.72706600  |
| C | 1.66287400  | 0.93508700  | 3.42747800  |
| H | 3.46932300  | 0.08140400  | 2.60087500  |
| H | 2.04251300  | 1.10054800  | 4.43443400  |
| C | -0.51522000 | 1.97199700  | 4.26181000  |
| O | -1.67266900 | 2.31747300  | 3.92688000  |

|    |             |            |             |
|----|-------------|------------|-------------|
| O  | 0.04642500  | 2.09387200 | 5.37764500  |
| C  | -1.29862600 | 4.18784100 | -1.33266000 |
| H  | -2.29868400 | 4.25218400 | -1.77226700 |
| H  | -1.09199200 | 5.05854900 | -0.70021400 |
| H  | -0.55394100 | 4.18083100 | -2.14265600 |
| C  | -1.13592200 | 2.90837300 | -0.57644500 |
| H  | 0.33921200  | 1.01848400 | -1.90221900 |
| H  | -0.25165900 | 2.81177700 | 0.07894100  |
| O  | -1.91362500 | 1.97346500 | -0.70631700 |
| Ru | -0.60830500 | 0.01349900 | -0.88973400 |

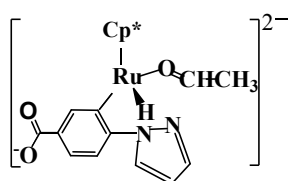

Ru-5

54

**E=-1283.80592(au)**

|   |             |             |             |
|---|-------------|-------------|-------------|
| C | -0.36638900 | -2.10391800 | -1.01637400 |
| C | -1.02407000 | -1.63498900 | -2.21832200 |
| C | -2.35399000 | -1.21369600 | -1.88100600 |
| C | -1.31455300 | -1.98471400 | 0.07705700  |
| C | -2.49507800 | -1.38313700 | -0.44848300 |
| C | -0.44028800 | -1.70002900 | -3.59170100 |
| H | -0.63394800 | -2.67018900 | -4.08178200 |
| H | -0.85011300 | -0.90899500 | -4.23248300 |
| H | 0.64680000  | -1.55417900 | -3.55781300 |
| C | 0.93425700  | -2.83214500 | -0.94214700 |
| H | 1.42710200  | -2.66488100 | 0.02380300  |
| H | 0.80079000  | -3.92240000 | -1.06287500 |
| H | 1.63687200  | -2.49203300 | -1.71331300 |
| C | -1.05411800 | -2.40162600 | 1.48451700  |
| H | -1.74131100 | -1.90829200 | 2.18306400  |
| H | -1.15787400 | -3.49113100 | 1.62710900  |
| H | -0.04000300 | -2.11902000 | 1.79641000  |
| C | -3.70547400 | -0.99017200 | 0.33233300  |
| H | -4.13882300 | -0.06333700 | -0.06499200 |
| H | -4.49037900 | -1.76418800 | 0.31107500  |
| H | -3.45074800 | -0.79118400 | 1.38080800  |
| C | -3.41485200 | -0.73267600 | -2.81312300 |
| H | -2.97232000 | -0.30235600 | -3.72095100 |
| H | -4.11414200 | -1.52974600 | -3.13085800 |
| H | -4.01655700 | 0.06074900  | -2.34913600 |
| C | 2.58886500  | 0.02486300  | -1.76571000 |

|    |             |             |             |
|----|-------------|-------------|-------------|
| C  | 3.59557800  | -0.64124000 | -2.44350200 |
| C  | 4.38605700  | -1.19637100 | -1.42282300 |
| N  | 3.91517800  | -0.90215900 | -0.21281400 |
| H  | 1.69745400  | 0.56258100  | -2.08029200 |
| H  | 3.72090400  | -0.71557200 | -3.51688700 |
| H  | 5.28149200  | -1.80585500 | -1.50956600 |
| N  | 2.81176200  | -0.15576400 | -0.44386100 |
| C  | 0.65866400  | 0.53244200  | 0.63038700  |
| C  | 2.06556300  | 0.40726400  | 0.66250900  |
| C  | 0.14518700  | 1.09289600  | 1.83184900  |
| C  | 2.85848600  | 0.82880400  | 1.74008900  |
| C  | 0.89587200  | 1.57010700  | 2.90678600  |
| H  | -0.93424200 | 1.16929700  | 1.96450900  |
| C  | 2.28254400  | 1.41450400  | 2.85470300  |
| H  | 3.93732600  | 0.69421800  | 1.66816700  |
| H  | 2.87367400  | 1.76401100  | 3.69944900  |
| C  | 0.23749400  | 2.28302400  | 4.09836600  |
| O  | -0.95772000 | 2.66023400  | 3.93128600  |
| O  | 0.95151400  | 2.44480000  | 5.11103600  |
| C  | -1.97248500 | 3.75851700  | 1.21723700  |
| H  | -3.06349900 | 3.66287000  | 1.23087100  |
| H  | -1.58012200 | 3.45840900  | 2.22344200  |
| H  | -1.66874200 | 4.79470700  | 1.02397200  |
| C  | -1.37199600 | 2.81470800  | 0.24787800  |
| H  | -0.06633800 | 1.07682100  | -1.87780400 |
| H  | -0.33090700 | 3.00483700  | -0.07581100 |
| O  | -1.94536100 | 1.80547600  | -0.15306400 |
| Ru | -0.80218300 | -0.01815800 | -0.82113500 |

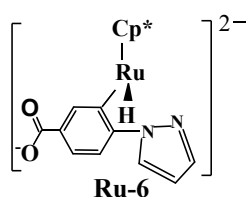

**47**

**E=-1130.021652(au)**

|   |             |             |             |
|---|-------------|-------------|-------------|
| C | -0.35255100 | -2.18266500 | -0.91906800 |
| C | -0.98215600 | -1.77417900 | -2.17371400 |
| C | -2.25076000 | -1.18750400 | -1.88026200 |
| C | -1.21893800 | -1.81910200 | 0.15148600  |
| C | -2.33861300 | -1.10613400 | -0.43629200 |
| C | -0.41042900 | -2.03174800 | -3.52835000 |
| H | -0.60684600 | -3.06033400 | -3.87762200 |
| H | -0.82847400 | -1.33746600 | -4.26782000 |
| H | 0.67702900  | -1.88296600 | -3.52500600 |

|    |             |             |             |
|----|-------------|-------------|-------------|
| C  | 0.96346200  | -2.87721600 | -0.80592600 |
| H  | 1.45754100  | -2.63704900 | 0.14315500  |
| H  | 0.86452000  | -3.97358200 | -0.87412100 |
| H  | 1.65156300  | -2.55071500 | -1.59698000 |
| C  | -0.99133800 | -2.02509600 | 1.61147500  |
| H  | -1.26652200 | -1.13790400 | 2.19852800  |
| H  | -1.56333600 | -2.88276600 | 2.00075100  |
| H  | 0.07016700  | -2.20283400 | 1.82257600  |
| C  | -3.47066000 | -0.52787500 | 0.34318600  |
| H  | -3.95425200 | 0.28594900  | -0.21079400 |
| H  | -4.23879100 | -1.28518800 | 0.57575300  |
| H  | -3.11325900 | -0.10803500 | 1.29126800  |
| C  | -3.25689700 | -0.67367600 | -2.85320000 |
| H  | -2.77998200 | -0.40625500 | -3.80495000 |
| H  | -4.05901700 | -1.40062600 | -3.07150800 |
| H  | -3.73044900 | 0.24194400  | -2.47592500 |
| C  | 2.47841100  | 0.20673700  | -1.81754100 |
| C  | 3.43493800  | -0.43645000 | -2.58595800 |
| C  | 4.30202900  | -1.00810400 | -1.64085600 |
| N  | 3.91598900  | -0.75131600 | -0.39097800 |
| H  | 1.59580700  | 0.78673400  | -2.08079200 |
| H  | 3.48758500  | -0.47224100 | -3.66696100 |
| H  | 5.19630000  | -1.60151600 | -1.80953400 |
| N  | 2.79851700  | -0.00830400 | -0.51963500 |
| C  | 0.68430800  | 0.69676200  | 0.52180000  |
| C  | 2.06568100  | 0.46362700  | 0.63310500  |
| C  | 0.08331200  | 1.15522700  | 1.71673600  |
| C  | 2.78722000  | 0.63595900  | 1.82000600  |
| C  | 0.74856600  | 1.29029900  | 2.93528000  |
| H  | -0.98826300 | 1.36250000  | 1.74002700  |
| C  | 2.12426300  | 1.03743100  | 2.96940500  |
| H  | 3.85724100  | 0.42952300  | 1.81857500  |
| H  | 2.63683500  | 1.16895200  | 3.92114100  |
| C  | -0.01156500 | 1.65001900  | 4.23050700  |
| O  | -1.26322700 | 1.61576800  | 4.15616900  |
| O  | 0.70795300  | 1.91895600  | 5.22283000  |
| H  | -0.63192100 | 1.44992500  | -1.84425100 |
| Ru | -0.60280600 | -0.03679700 | -0.97261500 |

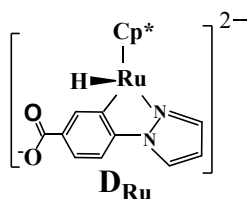

**E=-1130.046411(au)**

|   |             |             |             |
|---|-------------|-------------|-------------|
| C | -1.25886900 | -2.02977800 | 2.28758200  |
| C | -1.82240200 | -1.10218700 | 1.32739200  |
| C | -2.77286600 | -0.29608000 | 2.02305700  |
| C | -1.88011400 | -1.80093000 | 3.55367100  |
| C | -2.82440500 | -0.71470400 | 3.40376900  |
| C | -1.54664000 | -1.10320200 | -0.13925700 |
| H | -2.17987500 | -1.81859500 | -0.69875800 |
| H | -1.70969100 | -0.10969900 | -0.57812500 |
| H | -0.50274900 | -1.37846200 | -0.34655400 |
| C | -0.23000000 | -3.06145500 | 1.96500200  |
| H | 0.25921700  | -3.42767600 | 2.87608700  |
| H | -0.64913400 | -3.93627500 | 1.43627300  |
| H | 0.56217600  | -2.64714200 | 1.32331400  |
| C | -1.64866400 | -2.55762600 | 4.81867300  |
| H | -1.59550500 | -1.87939500 | 5.68060900  |
| H | -2.44572600 | -3.29339900 | 5.01686700  |
| H | -0.69333700 | -3.09681700 | 4.78676500  |
| C | -3.80133800 | -0.25255800 | 4.43246100  |
| H | -4.00053000 | 0.82195500  | 4.33384400  |
| H | -4.76971100 | -0.78194000 | 4.36968700  |
| H | -3.40977500 | -0.40310300 | 5.44577300  |
| C | -3.65228600 | 0.74528200  | 1.41233600  |
| H | -3.16366700 | 1.22274300  | 0.55324300  |
| H | -4.61540100 | 0.32904100  | 1.06783400  |
| H | -3.86908900 | 1.53940900  | 2.13624600  |
| C | 3.23482300  | 1.07835300  | 3.04812700  |
| C | 3.22988400  | 0.86398000  | 1.68079300  |
| C | 1.91651700  | 0.47667700  | 1.37780000  |
| N | 1.16198200  | 0.45160900  | 2.48830600  |
| H | 4.01637300  | 1.39575200  | 3.72501500  |
| H | 4.06274300  | 0.97998700  | 0.99849900  |
| H | 1.45823500  | 0.24038100  | 0.42500500  |
| N | 1.98121300  | 0.81684300  | 3.50208300  |
| C | 0.02161400  | 0.53868400  | 4.81358100  |
| C | 1.39797200  | 0.84863600  | 4.79283600  |
| C | -0.54118000 | 0.57150700  | 6.10950800  |
| C | 2.16302300  | 1.15264700  | 5.92186000  |
| C | 0.17941300  | 0.85460000  | 7.27029900  |
| H | -1.60604000 | 0.37774300  | 6.25081600  |
| C | 1.54597600  | 1.15118800  | 7.16268700  |
| H | 3.22872000  | 1.38272800  | 5.83056100  |
| H | 2.08082400  | 1.37495400  | 8.08404700  |
| H | -1.01092100 | 1.71103100  | 2.94990900  |



|    |             |            |            |
|----|-------------|------------|------------|
| C  | -0.48622200 | 0.85087500 | 8.66702600 |
| O  | -1.70346800 | 0.55774100 | 8.69812600 |
| O  | 0.27374800  | 1.14139700 | 9.62428900 |
| Ru | -0.82900500 | 0.06664000 | 2.99096000 |

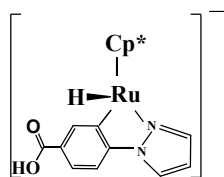

$E_{Ru}$

48

$E=-1130.5043698(\text{au})$

|   |             |             |             |
|---|-------------|-------------|-------------|
| C | 2.29483800  | -0.74033600 | 1.29159200  |
| C | 3.02782900  | -0.71990000 | 0.04354000  |
| C | 2.37500700  | -1.61554800 | -0.85087100 |
| C | 1.21260900  | -1.66394000 | 1.15840900  |
| C | 1.24408300  | -2.20653400 | -0.17993100 |
| C | 4.29844500  | 0.02279000  | -0.20512000 |
| H | 5.19241600  | -0.56246200 | 0.06975700  |
| H | 4.39982600  | 0.30120700  | -1.26185800 |
| H | 4.33710700  | 0.95151300  | 0.37987900  |
| C | 2.66841300  | 0.03440900  | 2.51108200  |
| H | 1.82874300  | 0.09607000  | 3.21350000  |
| H | 3.52058300  | -0.41228500 | 3.04907800  |
| H | 2.95036900  | 1.06653700  | 2.25926900  |
| C | 0.23631300  | -2.05490700 | 2.21733900  |
| H | -0.77320700 | -2.17771800 | 1.80446500  |
| H | 0.51147500  | -3.00279900 | 2.70554900  |
| H | 0.16620900  | -1.28466500 | 2.99494000  |
| C | 0.39359100  | -3.31605900 | -0.70224800 |
| H | 0.16815300  | -3.17618900 | -1.76680900 |
| H | 0.87045600  | -4.30390900 | -0.58717200 |
| H | -0.56776500 | -3.36058200 | -0.17506200 |
| C | 2.82535900  | -1.96078600 | -2.23190400 |
| H | 3.34297600  | -1.11787500 | -2.70513200 |
| H | 3.51074800  | -2.82348900 | -2.23359200 |
| H | 1.96994200  | -2.20971100 | -2.86992900 |
| C | -0.35770300 | 3.93826700  | -0.06917000 |
| C | 0.97707100  | 4.27578300  | -0.12415300 |
| C | 1.66730000  | 3.05448400  | -0.20171900 |
| N | 0.81173700  | 2.02488800  | -0.19150600 |
| H | -1.24956100 | 4.54675500  | -0.01297000 |
| H | 1.39758200  | 5.27240300  | -0.11707700 |
| H | 2.72885800  | 2.86066600  | -0.29120100 |

|    |             |             |             |
|----|-------------|-------------|-------------|
| N  | -0.42786500 | 2.57694900  | -0.10596300 |
| C  | -1.09296400 | 0.30475900  | -0.15459700 |
| C  | -1.49800800 | 1.66652500  | -0.06607800 |
| C  | -2.17879800 | -0.59606000 | -0.10888500 |
| C  | -2.81069600 | 2.10564400  | 0.06509200  |
| C  | -3.51014900 | -0.19657100 | 0.00913600  |
| H  | -1.99075600 | -1.66656600 | -0.20493900 |
| C  | -3.83561400 | 1.17020000  | 0.09937300  |
| H  | -3.04065100 | 3.16791900  | 0.15505800  |
| H  | -4.85912400 | 1.50123100  | 0.27624700  |
| H  | 0.55228900  | 0.18371100  | -1.92418100 |
| C  | -4.56314600 | -1.23728900 | 0.01610300  |
| O  | -4.42353700 | -2.38457500 | 0.36539100  |
| O  | -5.78613100 | -0.82491500 | -0.43168600 |
| Ru | 0.89668800  | -0.04622200 | -0.32814600 |
| H  | -5.67337300 | 0.05747000  | -0.80871200 |

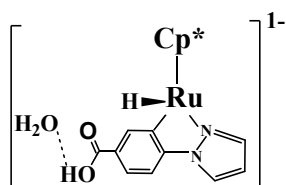

$E_{Ru'}$

**51**

**E=-1206.940329(au)**

|   |             |             |             |
|---|-------------|-------------|-------------|
| C | -0.97591100 | -2.05880400 | 2.87118700  |
| C | -1.52816700 | -1.41615600 | 1.69761500  |
| C | -2.64017700 | -0.63312900 | 2.11885500  |
| C | -1.76625600 | -1.67731400 | 3.99879300  |
| C | -2.79987900 | -0.77558000 | 3.54537800  |
| C | -1.05667500 | -1.62296700 | 0.29699700  |
| H | -1.52919800 | -2.49440100 | -0.18633700 |
| H | -1.26601600 | -0.74541900 | -0.32763200 |
| H | 0.02846100  | -1.79176000 | 0.26363200  |
| C | 0.18890100  | -2.99148800 | 2.85875700  |
| H | 0.60409000  | -3.12500300 | 3.86491600  |
| H | -0.07342300 | -3.98950800 | 2.47144700  |
| H | 1.00181600  | -2.60305100 | 2.22884800  |
| C | -1.60892700 | -2.16005500 | 5.40245900  |
| H | -1.76359900 | -1.34308600 | 6.12216300  |
| H | -2.33073600 | -2.95212800 | 5.65456800  |
| H | -0.60237000 | -2.56490600 | 5.57354700  |
| C | -3.94464200 | -0.26581900 | 4.35550600  |
| H | -4.25588700 | 0.73087800  | 4.01978000  |

|    |             |             |            |
|----|-------------|-------------|------------|
| H  | -4.82573900 | -0.92716200 | 4.30303800 |
| H  | -3.67575000 | -0.17326200 | 5.41546000 |
| C  | -3.54697200 | 0.15629800  | 1.23296200 |
| H  | -3.01910000 | 0.51452500  | 0.34141900 |
| H  | -4.41216600 | -0.43835400 | 0.89937700 |
| H  | -3.92795100 | 1.04152600  | 1.75436600 |
| C  | 3.01353200  | 1.76246100  | 3.15051000 |
| C  | 3.12751000  | 1.25956100  | 1.87202200 |
| C  | 1.90346800  | 0.61986200  | 1.61378600 |
| N  | 1.08650900  | 0.72029200  | 2.66864900 |
| H  | 3.69773600  | 2.33903800  | 3.75758700 |
| H  | 3.97854600  | 1.35014600  | 1.21067300 |
| H  | 1.55269500  | 0.11435700  | 0.72223900 |
| N  | 1.77633800  | 1.41856800  | 3.60639100 |
| C  | -0.22717300 | 1.11956400  | 4.83708200 |
| C  | 1.10747000  | 1.61791200  | 4.82830600 |
| C  | -0.88931800 | 1.33317100  | 6.06982300 |
| C  | 1.74744500  | 2.21190100  | 5.91135500 |
| C  | -0.26187100 | 1.87173700  | 7.19042400 |
| H  | -1.93464000 | 1.03292400  | 6.17329200 |
| C  | 1.06989100  | 2.31559800  | 7.12332800 |
| H  | 2.77229000  | 2.57592900  | 5.82710200 |
| H  | 1.55479500  | 2.74073400  | 8.00054200 |
| H  | -1.24920200 | 1.69743900  | 2.70216000 |
| C  | -0.97164500 | 1.84422300  | 8.50030100 |
| O  | -2.05087800 | 2.33749700  | 8.72516400 |
| O  | -0.30238300 | 1.17759500  | 9.46778500 |
| H  | 0.37875000  | 0.60862200  | 9.04958400 |
| O  | 1.26159300  | -0.64127500 | 7.87326600 |
| H  | 0.49265700  | -0.83694500 | 7.32154800 |
| H  | 1.68259800  | 0.07514900  | 7.37359500 |
| Ru | -0.85520700 | 0.16797600  | 3.16711700 |

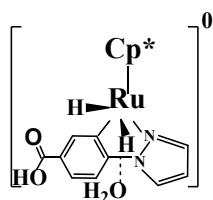

**Ru-7'**

**52**

**E=-1207.424877 (au)**

|   |             |             |             |
|---|-------------|-------------|-------------|
| C | -0.57490400 | -1.71923800 | -1.24704500 |
| C | -1.07079500 | -1.03114400 | -2.42759600 |
| C | -2.26444800 | -0.34869900 | -2.06909300 |
| C | -1.49084400 | -1.48209600 | -0.18156600 |

|    |             |             |             |
|----|-------------|-------------|-------------|
| C  | -2.50087300 | -0.58668000 | -0.66695800 |
| C  | -0.49747000 | -1.15777800 | -3.79927200 |
| H  | -0.87313900 | -2.06551800 | -4.29083900 |
| H  | -0.75113500 | -0.29725700 | -4.42621400 |
| H  | 0.59572500  | -1.23408800 | -3.77203600 |
| C  | 0.63530100  | -2.59142100 | -1.19559200 |
| H  | 1.06797400  | -2.60930200 | -0.18839100 |
| H  | 0.40361700  | -3.62735300 | -1.47764800 |
| H  | 1.41405400  | -2.23197300 | -1.87919300 |
| C  | -1.44485300 | -2.09467000 | 1.17607500  |
| H  | -1.83112900 | -1.42505300 | 1.95244600  |
| H  | -2.05181500 | -3.00960000 | 1.20044300  |
| H  | -0.42379400 | -2.36541600 | 1.46465300  |
| C  | -3.70926300 | -0.15117900 | 0.09417600  |
| H  | -4.07586200 | 0.81942900  | -0.25518500 |
| H  | -4.52412800 | -0.87845300 | -0.02270500 |
| H  | -3.50078400 | -0.05717000 | 1.16493300  |
| C  | -3.16474700 | 0.41535400  | -2.98240100 |
| H  | -2.60719500 | 0.87682600  | -3.80400500 |
| H  | -3.93243400 | -0.24181400 | -3.41327400 |
| H  | -3.68235000 | 1.21796900  | -2.44538300 |
| C  | 3.63383100  | 0.70356700  | -1.02929700 |
| C  | 3.49017000  | 0.81256100  | -2.39599100 |
| C  | 2.10540900  | 0.83941800  | -2.62335500 |
| N  | 1.44861300  | 0.74326600  | -1.46687600 |
| H  | 4.51539400  | 0.66625100  | -0.40455800 |
| H  | 4.27843300  | 0.87889200  | -3.13172200 |
| H  | 1.54590400  | 0.96369600  | -3.54399200 |
| N  | 2.38956700  | 0.66312300  | -0.49503300 |
| C  | 0.50210900  | 0.65546300  | 0.93175300  |
| C  | 1.90588000  | 0.62102900  | 0.82744800  |
| C  | 0.01124900  | 0.64793200  | 2.23970600  |
| C  | 2.77062300  | 0.54290000  | 1.91508600  |
| C  | 0.84347300  | 0.57449300  | 3.35757900  |
| H  | -1.06137600 | 0.69512200  | 2.42072800  |
| C  | 2.23238600  | 0.51430100  | 3.19290500  |
| H  | 3.84843000  | 0.48547900  | 1.77460100  |
| H  | 2.89923200  | 0.39405300  | 4.04554700  |
| C  | 0.18958700  | 0.50432100  | 4.69259000  |
| O  | -0.93619600 | 0.11002300  | 4.86550700  |
| O  | 0.93583700  | 0.90908800  | 5.74656600  |
| H  | -1.32602300 | 1.59237900  | 0.00618000  |
| H  | -0.69923100 | 2.01982900  | -1.33502100 |
| Ru | -0.54539000 | 0.48420900  | -0.82944000 |

|   |             |            |             |
|---|-------------|------------|-------------|
| H | 1.73813800  | 1.34177900 | 5.42971400  |
| O | -0.44374900 | 2.06442300 | -4.09385700 |
| H | -0.43009200 | 3.02230800 | -4.17039200 |
| H | -0.57880900 | 1.89809300 | -3.14269100 |

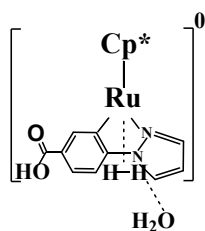

**Ru-7**

**52**

**E=-1207.427815(au)**

|   |             |             |             |
|---|-------------|-------------|-------------|
| C | -1.01448600 | -1.64091200 | 2.65339800  |
| C | -1.56959300 | -0.90691800 | 1.52767700  |
| C | -2.72088300 | -0.21632600 | 1.99001300  |
| C | -1.88797000 | -1.45596200 | 3.77511600  |
| C | -2.90466900 | -0.52712300 | 3.39427200  |
| C | -1.07818400 | -0.99865700 | 0.12155300  |
| H | -1.48335500 | -1.89539900 | -0.36756400 |
| H | -1.36581300 | -0.12750200 | -0.47515100 |
| H | 0.01435000  | -1.07804800 | 0.08140300  |
| C | 0.18068500  | -2.53317600 | 2.60095700  |
| H | 0.65350800  | -2.61803400 | 3.58641000  |
| H | -0.07682500 | -3.54708400 | 2.26473300  |
| H | 0.93658300  | -2.13794100 | 1.91137900  |
| C | -1.77886200 | -2.16414200 | 5.08139400  |
| H | -2.24138300 | -1.61048400 | 5.90515200  |
| H | -2.28194000 | -3.13828800 | 5.01709700  |
| H | -0.73601800 | -2.34730900 | 5.36043300  |
| C | -4.05430500 | -0.08711600 | 4.23875000  |
| H | -4.38341600 | 0.92301900  | 3.97120800  |
| H | -4.91716000 | -0.75751700 | 4.12293500  |
| H | -3.78721100 | -0.07197100 | 5.30121600  |
| C | -3.64694600 | 0.62239000  | 1.17183500  |
| H | -3.14009700 | 1.06314900  | 0.30722200  |
| H | -4.49430800 | 0.02670800  | 0.80568100  |
| H | -4.06022700 | 1.44657100  | 1.76477400  |
| C | 3.25331600  | 0.81050600  | 3.06035700  |
| C | 3.13796100  | 0.97831400  | 1.69791000  |
| C | 1.75691200  | 0.99719400  | 1.44482800  |
| N | 1.07363800  | 0.84517700  | 2.57962900  |
| H | 4.12312500  | 0.74873400  | 3.69957400  |
| H | 3.94027400  | 1.08179800  | 0.98187300  |

|    |             |             |            |
|----|-------------|-------------|------------|
| H  | 1.21660300  | 1.14797700  | 0.51672200 |
| N  | 1.99840800  | 0.73408400  | 3.56611700 |
| C  | 0.09608400  | 0.57198100  | 4.97027000 |
| C  | 1.49941900  | 0.61129900  | 4.88239000 |
| C  | -0.40960300 | 0.49186200  | 6.26883800 |
| C  | 2.35441900  | 0.53463000  | 5.97764900 |
| C  | 0.41118900  | 0.41460400  | 7.39626700 |
| H  | -1.48613000 | 0.47492500  | 6.43621500 |
| C  | 1.80237300  | 0.42801200  | 7.24672200 |
| H  | 3.43573300  | 0.54055400  | 5.85333400 |
| H  | 2.46541100  | 0.30675800  | 8.10236300 |
| H  | -1.45464100 | 2.01050500  | 3.80915700 |
| C  | -0.25525500 | 0.26103700  | 8.71775200 |
| O  | -1.36503300 | -0.18799200 | 8.85815200 |
| O  | 0.45835100  | 0.65505600  | 9.79827700 |
| O  | -0.85460200 | 2.18328300  | 0.05524500 |
| H  | -0.97092500 | 1.75403100  | 0.92343800 |
| H  | -0.70398500 | 3.10860600  | 0.26954300 |
| H  | -1.21449300 | 2.19419400  | 2.98888800 |
| H  | 1.24597100  | 1.13283100  | 9.51085900 |
| Ru | -0.93871200 | 0.46920700  | 3.17989800 |

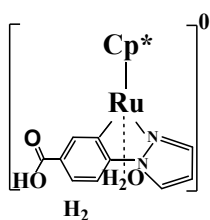

**Ru-8**

**52**

**E=-1207.412161 (au)**

|   |             |             |             |
|---|-------------|-------------|-------------|
| C | -1.10791400 | -1.87811400 | 2.34290000  |
| C | -1.67199000 | -1.02213900 | 1.31764300  |
| C | -2.63326800 | -0.19104000 | 1.95973400  |
| C | -1.79251200 | -1.61721100 | 3.58374600  |
| C | -2.73481600 | -0.55387200 | 3.35558400  |
| C | -1.33924000 | -1.05041900 | -0.13642300 |
| H | -1.99213600 | -1.73779700 | -0.69328000 |
| H | -1.44153400 | -0.05936800 | -0.59508400 |
| H | -0.30852700 | -1.38434400 | -0.30681100 |
| C | -0.07894400 | -2.93602100 | 2.12648800  |
| H | 0.53377800  | -3.07997100 | 3.02377500  |
| H | -0.54033300 | -3.90159400 | 1.87635200  |
| H | 0.60100400  | -2.67519100 | 1.30699300  |
| C | -1.61068700 | -2.37069700 | 4.85689900  |

|    |             |             |            |
|----|-------------|-------------|------------|
| H  | -1.84902600 | -1.75451400 | 5.73096700 |
| H  | -2.26194200 | -3.25507300 | 4.88632100 |
| H  | -0.57582800 | -2.71136600 | 4.97535800 |
| C  | -3.75590100 | -0.04344300 | 4.31514000 |
| H  | -4.02265900 | 0.99726000  | 4.09795600 |
| H  | -4.68088600 | -0.63655800 | 4.27283200 |
| H  | -3.39841300 | -0.07792700 | 5.35125900 |
| C  | -3.41362300 | 0.90920500  | 1.32505300 |
| H  | -2.95048100 | 1.24695700  | 0.39145000 |
| H  | -4.44048400 | 0.59240300  | 1.09742600 |
| H  | -3.47441300 | 1.77746700  | 1.99239000 |
| C  | 3.49094600  | 0.60058000  | 3.06977000 |
| C  | 3.47835300  | 0.44666000  | 1.70014700 |
| C  | 2.12574600  | 0.27070800  | 1.36887400 |
| N  | 1.36141700  | 0.30869700  | 2.46169900 |
| H  | 4.30986200  | 0.76326600  | 3.75650300 |
| H  | 4.32895100  | 0.45500500  | 1.03405100 |
| H  | 1.66665800  | 0.10726600  | 0.40114400 |
| N  | 2.20782400  | 0.51963200  | 3.50074400 |
| C  | 0.20652800  | 0.52470300  | 4.79191700 |
| C  | 1.61348400  | 0.63798200  | 4.78527500 |
| C  | -0.37107300 | 0.68479300  | 6.05872900 |
| C  | 2.40044800  | 0.83543200  | 5.91594700 |
| C  | 0.37548700  | 0.90806200  | 7.21930900 |
| H  | -1.45442400 | 0.63514500  | 6.17425800 |
| C  | 1.77179800  | 0.96775500  | 7.14633800 |
| H  | 3.48685000  | 0.87300900  | 5.85515800 |
| H  | 2.38392500  | 1.06598900  | 8.04211500 |
| H  | -2.75514400 | 2.95859100  | 5.14417600 |
| C  | -0.36500200 | 1.04167000  | 8.50414400 |
| O  | -1.48245200 | 0.62808700  | 8.68259000 |
| O  | 0.28650100  | 1.67819000  | 9.50700300 |
| O  | -0.67148600 | 2.45210500  | 2.70343500 |
| H  | -0.49659800 | 2.70641500  | 3.62030300 |
| H  | 0.15418100  | 2.61267800  | 2.22924800 |
| H  | -2.65170300 | 3.06687800  | 4.41370600 |
| H  | 1.09499500  | 2.08046000  | 9.16757300 |
| Ru | -0.71041800 | 0.12185800  | 2.96366200 |

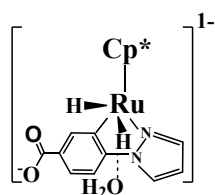

**Ru-9'**

51

**E=-1206.96635 (au)**

|   |             |             |             |
|---|-------------|-------------|-------------|
| C | -0.58647500 | -1.73315000 | -1.32924700 |
| C | -1.29233300 | -1.03147700 | -2.37152000 |
| C | -2.35724300 | -0.29897100 | -1.73703800 |
| C | -1.22111200 | -1.47296100 | -0.08494500 |
| C | -2.30032600 | -0.55606500 | -0.32061700 |
| C | -1.08568800 | -1.22135300 | -3.83949400 |
| H | -1.61036800 | -2.11781500 | -4.20242000 |
| H | -1.44430400 | -0.36562900 | -4.42114000 |
| H | -0.02390200 | -1.34277300 | -4.08502600 |
| C | 0.60679500  | -2.61042100 | -1.51089400 |
| H | 1.32655300  | -2.47005200 | -0.69444500 |
| H | 0.32834500  | -3.67369500 | -1.52423900 |
| H | 1.12778100  | -2.39221900 | -2.45009000 |
| C | -0.83143900 | -2.07702700 | 1.22283700  |
| H | -1.21528700 | -1.52092000 | 2.08610600  |
| H | -1.20541500 | -3.10899400 | 1.28489000  |
| H | 0.25956400  | -2.11110400 | 1.33598600  |
| C | -3.31774900 | -0.11315800 | 0.68059000  |
| H | -3.62740800 | 0.92210200  | 0.49786500  |
| H | -4.21610200 | -0.74489100 | 0.62331200  |
| H | -2.94196800 | -0.16592200 | 1.70878200  |
| C | -3.43410700 | 0.47317300  | -2.42606600 |
| H | -3.09089600 | 0.86707000  | -3.38948300 |
| H | -4.31841800 | -0.15361300 | -2.61277500 |
| H | -3.75206500 | 1.32715500  | -1.81796600 |
| C | 3.70698700  | 0.70255800  | -0.87102600 |
| C | 3.67499200  | 0.69652300  | -2.25478400 |
| C | 2.31663800  | 0.72208500  | -2.59129200 |
| N | 1.56843100  | 0.74087100  | -1.48151300 |
| H | 4.53059400  | 0.70016300  | -0.17047100 |
| H | 4.52143900  | 0.68784700  | -2.92685000 |
| H | 1.82846000  | 0.76547000  | -3.55919700 |
| N | 2.42788200  | 0.72910600  | -0.43770200 |
| C | 0.44119300  | 0.85422600  | 0.83444400  |
| C | 1.83787200  | 0.75423800  | 0.84937500  |
| C | -0.18557100 | 0.85605000  | 2.07664000  |
| C | 2.58472000  | 0.64393800  | 2.02410900  |
| C | 0.50879000  | 0.66171600  | 3.26655900  |
| H | -1.26781800 | 0.92186500  | 2.16157600  |
| C | 1.90448400  | 0.58927900  | 3.23401400  |
| H | 3.67285800  | 0.56968600  | 1.98808500  |
| H | 2.41888500  | 0.46599900  | 4.18523300  |



|    |             |            |             |
|----|-------------|------------|-------------|
| C  | -0.28125300 | 0.39861600 | 4.56676800  |
| O  | -1.49258000 | 0.12741200 | 4.38241400  |
| O  | 0.38649200  | 0.44733400 | 5.61828300  |
| H  | -0.99124700 | 1.92933700 | -0.38625900 |
| H  | -0.63329100 | 1.82874200 | -1.95836400 |
| Ru | -0.47947900 | 0.54651400 | -0.99497700 |
| O  | -0.07269500 | 1.71795700 | -4.53363000 |
| H  | -0.31784700 | 1.44362900 | -3.62973900 |
| H  | 0.24756200  | 2.61397300 | -4.39312300 |

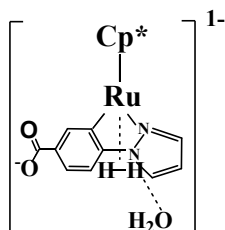

**Ru-9**

**51**

**E=-1206.970263(au)**

|   |             |             |             |
|---|-------------|-------------|-------------|
| C | -0.98604500 | -1.61234300 | 2.58089700  |
| C | -1.64065200 | -0.88643300 | 1.50475700  |
| C | -2.75490800 | -0.20962900 | 2.07804700  |
| C | -1.75516100 | -1.44700600 | 3.77498100  |
| C | -2.81771200 | -0.53291100 | 3.48900200  |
| C | -1.28142200 | -1.00575300 | 0.05970800  |
| H | -1.64123700 | -1.95884600 | -0.35719900 |
| H | -1.70805300 | -0.19658000 | -0.54195700 |
| H | -0.19468600 | -0.97899600 | -0.08871600 |
| C | 0.21915700  | -2.47829200 | 2.42512600  |
| H | 0.75590300  | -2.57709900 | 3.37575700  |
| H | -0.04417500 | -3.48950700 | 2.08171000  |
| H | 0.92124100  | -2.05416000 | 1.69641200  |
| C | -1.50741400 | -2.13458200 | 5.07472700  |
| H | -1.85612600 | -1.55802200 | 5.93867000  |
| H | -2.01922400 | -3.10726400 | 5.08364300  |
| H | -0.43896100 | -2.31462700 | 5.23876300  |
| C | -3.90756800 | -0.12923600 | 4.42620300  |
| H | -4.26604500 | 0.88310900  | 4.20612800  |
| H | -4.77007700 | -0.80840500 | 4.35423000  |
| H | -3.56817900 | -0.13593900 | 5.46800600  |
| C | -3.76937700 | 0.61841900  | 1.35971600  |
| H | -3.38785700 | 0.99557100  | 0.40467900  |
| H | -4.68073900 | 0.03760800  | 1.15548000  |
| H | -4.06466600 | 1.48727400  | 1.95997900  |
| C | 3.28316900  | 0.77107100  | 3.12563200  |

|    |             |            |             |
|----|-------------|------------|-------------|
| C  | 3.22759200  | 0.87888200 | 1.74674800  |
| C  | 1.86245700  | 0.91719700 | 1.44044500  |
| N  | 1.13271600  | 0.83676300 | 2.55989900  |
| H  | 4.12064400  | 0.71732000 | 3.80752400  |
| H  | 4.06160100  | 0.93029900 | 1.06111600  |
| H  | 1.35546300  | 1.03173500 | 0.48871000  |
| N  | 2.01313600  | 0.74961100 | 3.58335800  |
| C  | 0.05779200  | 0.69338100 | 4.91845800  |
| C  | 1.45751200  | 0.67332000 | 4.88953400  |
| C  | -0.52366600 | 0.63213400 | 6.18379800  |
| C  | 2.25038400  | 0.57236700 | 6.03419200  |
| C  | 0.22143300  | 0.47087700 | 7.34937100  |
| H  | -1.60581700 | 0.64601000 | 6.31415000  |
| C  | 1.61679100  | 0.46272300 | 7.26533400  |
| H  | 3.33946300  | 0.56300600 | 5.96289000  |
| H  | 2.16854000  | 0.35850000 | 8.19753800  |
| H  | -1.35326100 | 2.08676400 | 3.67684500  |
| C  | -0.49943300 | 0.22351800 | 8.69514900  |
| O  | -1.72925200 | 0.01030300 | 8.59171000  |
| O  | 0.23885200  | 0.24067700 | 9.70132000  |
| O  | -0.69390500 | 2.14998600 | -0.02877100 |
| H  | -0.87038500 | 1.60364400 | 0.76393500  |
| H  | -0.30465500 | 2.94186600 | 0.35512200  |
| H  | -1.16125100 | 2.22642800 | 2.82802500  |
| Ru | -0.90930000 | 0.51829600 | 3.09242100  |

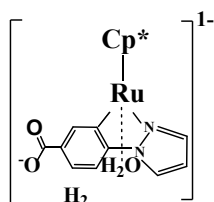

**Ru-10**

**51**

**E=-1206.95206(au)**

|   |             |             |             |
|---|-------------|-------------|-------------|
| C | -1.11345800 | -1.94399000 | 2.31406900  |
| C | -1.61973100 | -1.10473400 | 1.23939800  |
| C | -2.58148100 | -0.23041300 | 1.80719600  |
| C | -1.85367000 | -1.63409500 | 3.51503200  |
| C | -2.74447800 | -0.54738900 | 3.21654600  |
| C | -1.20553500 | -1.18058500 | -0.19138100 |
| H | -1.79255300 | -1.92284200 | -0.75428400 |
| H | -1.32516400 | -0.21443100 | -0.69741000 |
| H | -0.15103100 | -1.47043100 | -0.28882200 |

|    |             |             |            |
|----|-------------|-------------|------------|
| C  | -0.11208100 | -3.03891500 | 2.15832100 |
| H  | 0.42440600  | -3.21211700 | 3.09817500 |
| H  | -0.57873500 | -3.98820300 | 1.85366900 |
| H  | 0.64187600  | -2.78540200 | 1.40229900 |
| C  | -1.74882300 | -2.34377500 | 4.82155100 |
| H  | -1.88097400 | -1.65489100 | 5.66323600 |
| H  | -2.50831300 | -3.13452300 | 4.90629800 |
| H  | -0.76280100 | -2.80563600 | 4.94476200 |
| C  | -3.74140900 | 0.07114000  | 4.13891400 |
| H  | -3.87867200 | 1.13831000  | 3.92003400 |
| H  | -4.73001700 | -0.40764000 | 4.06316000 |
| H  | -3.42106100 | 0.00483000  | 5.18548400 |
| C  | -3.31234100 | 0.86328800  | 1.10458100 |
| H  | -2.80109900 | 1.15596700  | 0.18009000 |
| H  | -4.33963000 | 0.56681900  | 0.84611600 |
| H  | -3.37729400 | 1.75817500  | 1.73539200 |
| C  | 3.49808900  | 0.55656000  | 2.94975300 |
| C  | 3.46801500  | 0.39587100  | 1.57503000 |
| C  | 2.11215600  | 0.23740800  | 1.26347700 |
| N  | 1.36415400  | 0.29355400  | 2.37023300 |
| H  | 4.32135100  | 0.70915200  | 3.63398900 |
| H  | 4.31133900  | 0.39084100  | 0.89882700 |
| H  | 1.63055000  | 0.08024200  | 0.30531000 |
| N  | 2.22424600  | 0.49519200  | 3.39513700 |
| C  | 0.25365900  | 0.40592600  | 4.72721500 |
| C  | 1.63993800  | 0.63505900  | 4.69062300 |
| C  | -0.34601700 | 0.65890500  | 5.96840800 |
| C  | 2.40115400  | 1.02578400  | 5.79234600 |
| C  | 0.36193000  | 1.09176200  | 7.09118900 |
| H  | -1.42403200 | 0.54955500  | 6.10459200 |
| C  | 1.74789600  | 1.24401900  | 6.99830300 |
| H  | 3.47844600  | 1.18169600  | 5.70704200 |
| H  | 2.27247800  | 1.55892200  | 7.89821200 |
| H  | -2.43754000 | 2.56823000  | 6.62549400 |
| C  | -0.37413200 | 1.43666000  | 8.40383200 |
| O  | -1.62690800 | 1.44927300  | 8.31814300 |
| O  | 0.36331800  | 1.67513900  | 9.38002200 |
| O  | -0.81753200 | 2.40785400  | 3.05298800 |
| H  | -1.12005300 | 2.38256800  | 3.97576200 |
| H  | 0.11597700  | 2.64422400  | 3.13327100 |
| H  | -2.72968200 | 2.89522700  | 6.00684300 |
| Ru | -0.69357700 | 0.04868500  | 2.90734900 |

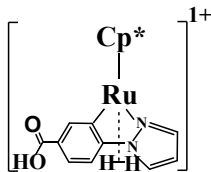

**Ru-11**

**49**

**E=-1130.971358(au)**

|   |             |             |             |
|---|-------------|-------------|-------------|
| C | -1.06611400 | -1.99252200 | -2.19527600 |
| C | -1.40749100 | -0.61341000 | -2.37199200 |
| C | -2.14414000 | -0.16412800 | -1.19754300 |
| C | -1.50342700 | -2.36476000 | -0.88256900 |
| C | -2.21804000 | -1.25852300 | -0.28156700 |
| C | -1.13347700 | 0.21106200  | -3.58193700 |
| H | -1.91509200 | 0.07701700  | -4.34298100 |
| H | -1.09032900 | 1.27633800  | -3.33233100 |
| H | -0.17240900 | -0.05359800 | -4.04010400 |
| C | -0.36691400 | -2.87214500 | -3.17656600 |
| H | 0.34410100  | -3.54562500 | -2.68196300 |
| H | -1.07223000 | -3.49902500 | -3.73986000 |
| H | 0.19460400  | -2.28285500 | -3.91140000 |
| C | -1.30869900 | -3.69518500 | -0.24270400 |
| H | -1.21964300 | -3.59815900 | 0.84506100  |
| H | -2.15696200 | -4.36325700 | -0.44926000 |
| H | -0.39974100 | -4.18582700 | -0.60814500 |
| C | -2.92974500 | -1.30091200 | 1.02731600  |
| H | -3.13780200 | -0.29483500 | 1.40785200  |
| H | -3.89289400 | -1.82363700 | 0.94501800  |
| H | -2.33504700 | -1.81704500 | 1.79068000  |
| C | -2.73799700 | 1.19189500  | -1.02780100 |
| H | -2.05626900 | 1.96732100  | -1.39808800 |
| H | -3.68684200 | 1.28638900  | -1.57382100 |
| H | -2.93510800 | 1.41310300  | 0.02637100  |
| C | 3.82739400  | 0.60895800  | -0.59638500 |
| C | 4.03548400  | -0.17313800 | -1.71611900 |
| C | 2.79864100  | -0.78294700 | -1.95781500 |
| N | 1.89826300  | -0.40355300 | -1.05210100 |
| H | 4.49993400  | 1.25914800  | -0.05398500 |
| H | 4.95306700  | -0.28260700 | -2.27532000 |
| H | 2.50614000  | -1.47404100 | -2.73875200 |
| N | 2.54237800  | 0.44802200  | -0.21670900 |
| C | 0.42284200  | 0.63517100  | 0.87683100  |
| C | 1.77867100  | 1.01362700  | 0.84768400  |
| C | -0.30916100 | 1.18951000  | 1.93108200  |

|    |             |             |             |
|----|-------------|-------------|-------------|
| C  | 2.38379000  | 1.86400700  | 1.76615700  |
| C  | 0.24526000  | 2.07322100  | 2.86282200  |
| H  | -1.36323600 | 0.94136100  | 2.05566800  |
| C  | 1.60161300  | 2.40163100  | 2.77971000  |
| H  | 3.44444500  | 2.10339900  | 1.71769600  |
| H  | 2.07698200  | 3.03413800  | 3.52865800  |
| C  | -0.64383600 | 2.60583600  | 3.93211500  |
| O  | -1.66248600 | 2.07045500  | 4.28724600  |
| O  | -0.25398900 | 3.76737000  | 4.51016600  |
| H  | 1.37127200  | 2.25473700  | -2.72754600 |
| H  | 1.23853600  | 2.12780300  | -2.00364400 |
| Ru | -0.16568500 | -0.69784900 | -0.63948500 |
| H  | 0.47717000  | 4.15258200  | 4.01251200  |

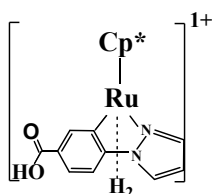

**Ru-12**

**49**

**E=-1130.97152(au)**

|   |             |             |             |
|---|-------------|-------------|-------------|
| C | -1.06807300 | -1.99046900 | -2.19879800 |
| C | -1.40290900 | -0.60631500 | -2.35743100 |
| C | -2.14393000 | -0.17094200 | -1.18043300 |
| C | -1.51001600 | -2.37802200 | -0.89293000 |
| C | -2.22142700 | -1.27653100 | -0.27848400 |
| C | -1.11554200 | 0.23588300  | -3.55198000 |
| H | -1.90507500 | 0.14038500  | -4.31065300 |
| H | -1.03989400 | 1.29394400  | -3.27919600 |
| H | -0.16496700 | -0.04603200 | -4.02156400 |
| C | -0.36980700 | -2.85969400 | -3.19006900 |
| H | 0.33832100  | -3.54175400 | -2.70309600 |
| H | -1.07599700 | -3.47711200 | -3.76262100 |
| H | 0.19465100  | -2.26288700 | -3.91653500 |
| C | -1.32121500 | -3.71654100 | -0.26825600 |
| H | -1.22079600 | -3.63073800 | 0.81953300  |
| H | -2.17775500 | -4.37464400 | -0.47252200 |
| H | -0.42061200 | -4.21224000 | -0.64724500 |
| C | -2.93349300 | -1.33352800 | 1.02969200  |
| H | -3.13675400 | -0.33174300 | 1.42380800  |
| H | -3.89868900 | -1.85150500 | 0.94124500  |
| H | -2.34014300 | -1.86189700 | 1.78571700  |
| C | -2.74010800 | 1.18240600  | -0.99787400 |
| H | -2.05769800 | 1.96352700  | -1.35444800 |

|    |             |             |             |
|----|-------------|-------------|-------------|
| H  | -3.68549100 | 1.28149000  | -1.54903100 |
| H  | -2.94542200 | 1.39115500  | 0.05725400  |
| C  | 3.82339800  | 0.59961900  | -0.60187900 |
| C  | 4.03379800  | -0.20123000 | -1.70767100 |
| C  | 2.79755600  | -0.81577300 | -1.94141600 |
| N  | 1.89548700  | -0.42153900 | -1.04375400 |
| H  | 4.49458400  | 1.25929100  | -0.06939700 |
| H  | 4.95245600  | -0.31979700 | -2.26326800 |
| H  | 2.50723900  | -1.52103000 | -2.71037200 |
| N  | 2.53744000  | 0.44463300  | -0.22231500 |
| C  | 0.42054500  | 0.63355300  | 0.87508300  |
| C  | 1.77341000  | 1.02193600  | 0.83506900  |
| C  | -0.30997000 | 1.19345300  | 1.92744200  |
| C  | 2.37559200  | 1.89039500  | 1.73844700  |
| C  | 0.24194100  | 2.09296500  | 2.84549000  |
| H  | -1.36078900 | 0.93689000  | 2.06202200  |
| C  | 1.59438600  | 2.43387400  | 2.74960900  |
| H  | 3.43364800  | 2.13901300  | 1.68020800  |
| H  | 2.06798000  | 3.08098000  | 3.48713600  |
| C  | -0.64563100 | 2.62971000  | 3.91399400  |
| O  | -1.65671000 | 2.08873000  | 4.28204900  |
| O  | -0.26368400 | 3.80200300  | 4.47536700  |
| H  | 1.42965600  | 2.14951500  | -2.66833800 |
| H  | 1.30846000  | 2.24904100  | -1.93856400 |
| Ru | -0.16698000 | -0.71541600 | -0.62674300 |
| H  | 0.46097400  | 4.18785100  | 3.96877200  |

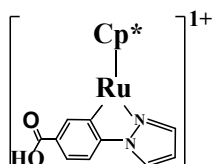

**Ru-13**

47

**E=-1129.79855(au)**

|   |             |             |             |
|---|-------------|-------------|-------------|
| C | -1.06882100 | -1.90796500 | -2.25582800 |
| C | -1.56077900 | -0.57905300 | -2.43112900 |
| C | -2.26509400 | -0.17502100 | -1.22265600 |
| C | -1.37903200 | -2.29403500 | -0.90848000 |
| C | -2.16419200 | -1.24435900 | -0.28516900 |
| C | -1.43840500 | 0.24708300  | -3.66422100 |
| H | -2.29911900 | 0.09828400  | -4.33171300 |
| H | -1.38717700 | 1.31481000  | -3.42397500 |
| H | -0.53238400 | -0.00661900 | -4.22673200 |
| C | -0.33968800 | -2.72881500 | -3.26542400 |

|    |             |             |             |
|----|-------------|-------------|-------------|
| H  | 0.38679200  | -3.39921000 | -2.78932100 |
| H  | -1.02258000 | -3.35657600 | -3.85459900 |
| H  | 0.20956700  | -2.09682000 | -3.97460200 |
| C  | -1.03898300 | -3.59483100 | -0.26935300 |
| H  | -0.92399100 | -3.48269200 | 0.81432000  |
| H  | -1.82627000 | -4.34194300 | -0.44535300 |
| H  | -0.09965900 | -4.00081800 | -0.66163000 |
| C  | -2.76692000 | -1.32054600 | 1.07582600  |
| H  | -3.06474100 | -0.33284400 | 1.44408300  |
| H  | -3.66212800 | -1.95765900 | 1.08209600  |
| H  | -2.05650500 | -1.73318300 | 1.80208900  |
| C  | -2.99292300 | 1.11326200  | -1.04661000 |
| H  | -2.43631200 | 1.94698600  | -1.49030500 |
| H  | -3.98350300 | 1.08253800  | -1.52160600 |
| H  | -3.13937600 | 1.35124000  | 0.01201600  |
| C  | 3.89478700  | 0.33867300  | -0.38605700 |
| C  | 4.10950000  | -0.44499400 | -1.50370300 |
| C  | 2.83605600  | -0.89675500 | -1.86896200 |
| N  | 1.90865800  | -0.42562100 | -1.03644700 |
| H  | 4.58826200  | 0.89231300  | 0.23200800  |
| H  | 5.05437900  | -0.65568900 | -1.98271800 |
| H  | 2.53546300  | -1.53758000 | -2.68863600 |
| N  | 2.57095800  | 0.33304000  | -0.12853800 |
| C  | 0.40725300  | 0.72080700  | 0.82107800  |
| C  | 1.79207900  | 0.96194200  | 0.88909300  |
| C  | -0.33689300 | 1.34154900  | 1.82776700  |
| C  | 2.41471300  | 1.73566500  | 1.86214700  |
| C  | 0.23684400  | 2.15312400  | 2.81217200  |
| H  | -1.41727000 | 1.20566900  | 1.87279800  |
| C  | 1.62243600  | 2.33790300  | 2.83028800  |
| H  | 3.49484700  | 1.86720000  | 1.88887800  |
| H  | 2.10669700  | 2.90600100  | 3.62387000  |
| C  | -0.66664500 | 2.76267300  | 3.82685300  |
| O  | -1.76080000 | 2.33614500  | 4.09440900  |
| O  | -0.19746800 | 3.86422100  | 4.46053900  |
| Ru | -0.20121400 | -0.52157600 | -0.76688000 |
| H  | 0.60555600  | 4.17605300  | 4.02638400  |

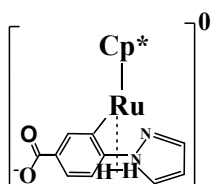

**Ru-14**

**E=-1130.53097(au)**

|   |             |             |             |
|---|-------------|-------------|-------------|
| C | -0.58658600 | -1.84622200 | -1.35348600 |
| C | -1.25344100 | -1.16329700 | -2.44352900 |
| C | -2.31401600 | -0.40288800 | -1.86133500 |
| C | -1.28381800 | -1.56570900 | -0.13695600 |
| C | -2.33979200 | -0.64138100 | -0.43487200 |
| C | -0.94726800 | -1.32465000 | -3.89544900 |
| H | -1.46030400 | -2.19491500 | -4.33446500 |
| H | -1.24949400 | -0.43977300 | -4.46867400 |
| H | 0.12750400  | -1.46828400 | -4.06417400 |
| C | 0.59422300  | -2.74787100 | -1.49458800 |
| H | 1.16484000  | -2.79816700 | -0.55967900 |
| H | 0.29662100  | -3.77238400 | -1.76114500 |
| H | 1.27992900  | -2.38816900 | -2.27205700 |
| C | -0.97608600 | -2.15181000 | 1.20074200  |
| H | -1.32066900 | -1.52201500 | 2.02914800  |
| H | -1.44912400 | -3.13893800 | 1.30127800  |
| H | 0.10353600  | -2.27963400 | 1.34393400  |
| C | -3.38344000 | -0.15473100 | 0.51626600  |
| H | -3.69411200 | 0.86896500  | 0.27628400  |
| H | -4.28175500 | -0.78967100 | 0.48629000  |
| H | -3.02088200 | -0.14597900 | 1.55089100  |
| C | -3.30677800 | 0.43711400  | -2.59528400 |
| H | -2.90005500 | 0.80619700  | -3.54427700 |
| H | -4.22358500 | -0.12777000 | -2.81867700 |
| H | -3.59747800 | 1.31129900  | -2.00084300 |
| C | 3.75551600  | 0.66141300  | -0.83339200 |
| C | 3.74941300  | 0.55028400  | -2.21383500 |
| C | 2.39588800  | 0.46671500  | -2.56122800 |
| N | 1.62897000  | 0.52078100  | -1.46781700 |
| H | 4.56666100  | 0.76055400  | -0.12534400 |
| H | 4.60654600  | 0.53794600  | -2.87226200 |
| H | 1.92725200  | 0.37478200  | -3.53385000 |
| N | 2.47071900  | 0.63957500  | -0.41773200 |
| C | 0.46269200  | 0.73841400  | 0.83391600  |
| C | 1.86336600  | 0.72191100  | 0.86600400  |
| C | -0.16732700 | 0.80288300  | 2.07582900  |
| C | 2.61089700  | 0.74392400  | 2.04498500  |
| C | 0.53026300  | 0.75979600  | 3.28026700  |
| H | -1.25311100 | 0.82016400  | 2.15866300  |
| C | 1.92840600  | 0.75593900  | 3.25465200  |
| H | 3.70206300  | 0.72600900  | 2.01808700  |
| H | 2.44335500  | 0.74482800  | 4.21344600  |
| C | -0.24779900 | 0.62047800  | 4.60859500  |



|    |             |            |             |
|----|-------------|------------|-------------|
| O  | -1.46555700 | 0.35929200 | 4.46925700  |
| O  | 0.43778600  | 0.75490100 | 5.64284100  |
| H  | -0.72711100 | 2.01848500 | -0.78773300 |
| H  | -0.57096100 | 1.92158900 | -1.65094100 |
| Ru | -0.42830600 | 0.31787200 | -0.99236300 |

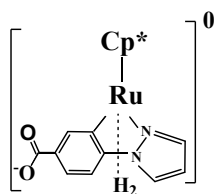

**Ru-15**

**48**

**E=-1130.514631(au)**

|   |             |             |             |
|---|-------------|-------------|-------------|
| C | -0.93547100 | -2.51686000 | -1.19901600 |
| C | -1.15371900 | -1.55355600 | -2.23206500 |
| C | -1.84429700 | -0.44785200 | -1.62930400 |
| C | -1.60124500 | -2.07759400 | 0.01591500  |
| C | -2.16552100 | -0.79336800 | -0.24882800 |
| C | -0.68957400 | -1.64517500 | -3.64699500 |
| H | -1.39024400 | -2.20663800 | -4.28342200 |
| H | -0.57943300 | -0.64797800 | -4.09259900 |
| H | 0.28676500  | -2.14300800 | -3.71944800 |
| C | -0.21194300 | -3.81187700 | -1.34147600 |
| H | 0.32363300  | -4.06231600 | -0.41849400 |
| H | -0.90404300 | -4.63959100 | -1.55907900 |
| H | 0.52743400  | -3.77082700 | -2.14994700 |
| C | -1.68707500 | -2.86400400 | 1.27948900  |
| H | -0.72110400 | -3.32217800 | 1.52438800  |
| H | -1.95741400 | -2.23180400 | 2.13153500  |
| H | -2.43395600 | -3.66869800 | 1.20654900  |
| C | -2.95142000 | 0.05103100  | 0.69494500  |
| H | -2.72988000 | 1.11456600  | 0.54609600  |
| H | -4.03388100 | -0.09355300 | 0.56438300  |
| H | -2.70062500 | -0.17292800 | 1.73726300  |
| C | -2.23522100 | 0.81513500  | -2.31750800 |
| H | -1.47207300 | 1.11499600  | -3.04738800 |
| H | -3.19431300 | 0.71693500  | -2.84809900 |
| H | -2.32968700 | 1.63745800  | -1.59980600 |
| C | 3.36017400  | 1.73503900  | -0.81474800 |
| C | 3.35801500  | 1.48070200  | -2.17881400 |
| C | 2.27383800  | 0.62145800  | -2.37283700 |
| N | 1.66051600  | 0.36809200  | -1.21352600 |
| H | 4.00999200  | 2.35011700  | -0.20740200 |
| H | 4.04581100  | 1.86722900  | -2.91725200 |

|    |             |             |             |
|----|-------------|-------------|-------------|
| H  | 1.89350300  | 0.16910100  | -3.28109500 |
| N  | 2.33878100  | 1.05358900  | -0.26735900 |
| C  | 0.68259100  | 0.18999600  | 1.23772500  |
| C  | 1.84886200  | 0.96146400  | 1.07902200  |
| C  | 0.20901000  | 0.11128400  | 2.55466700  |
| C  | 2.50677800  | 1.61286200  | 2.11701100  |
| C  | 0.82710400  | 0.74642000  | 3.63344400  |
| H  | -0.68518300 | -0.46172800 | 2.80456000  |
| C  | 1.97948800  | 1.49677100  | 3.39907000  |
| H  | 3.41097100  | 2.19856300  | 1.94134100  |
| H  | 2.43303400  | 1.97842500  | 4.26361800  |
| C  | 0.24786600  | 0.63703000  | 5.06525200  |
| O  | -0.79175000 | -0.04962300 | 5.16130000  |
| O  | 0.89623100  | 1.25378800  | 5.93759100  |
| H  | 0.35306100  | 2.89843900  | -0.67251000 |
| H  | 0.43803400  | 3.23277300  | -1.33498000 |
| Ru | -0.05789900 | -0.67470100 | -0.50593900 |

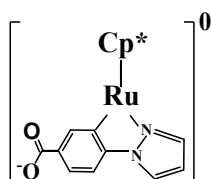

**Ru-16**

**46**

**E=-1129.342256(au)**

|   |             |             |             |
|---|-------------|-------------|-------------|
| C | -2.05781900 | -1.07620500 | -1.64984300 |
| C | -2.93338300 | -0.89017000 | -0.51021900 |
| C | -2.39307600 | -1.64218200 | 0.57070200  |
| C | -1.00571400 | -1.97634900 | -1.26414200 |
| C | -1.19565000 | -2.31330200 | 0.12490800  |
| C | -4.19134800 | -0.08645800 | -0.49341900 |
| H | -5.08023000 | -0.68628900 | -0.74633600 |
| H | -4.36355200 | 0.36051500  | 0.49414600  |
| H | -4.14704600 | 0.73749800  | -1.21874600 |
| C | -2.27915200 | -0.49946200 | -3.00831500 |
| H | -1.34470000 | -0.46980400 | -3.58080200 |
| H | -3.01266400 | -1.07777900 | -3.59211000 |
| H | -2.65014600 | 0.53261400  | -2.94679800 |
| C | 0.05584600  | -2.53249300 | -2.15255300 |
| H | 0.98524100  | -2.71601700 | -1.59979300 |
| H | -0.25223900 | -3.48689100 | -2.60557500 |
| H | 0.30433600  | -1.83814000 | -2.96445500 |
| C | -0.42906900 | -3.31412900 | 0.92153500  |

|    |             |             |             |
|----|-------------|-------------|-------------|
| H  | -0.39499900 | -3.02826100 | 1.97929000  |
| H  | -0.87397000 | -4.32052000 | 0.85865800  |
| H  | 0.60911000  | -3.39675900 | 0.57589300  |
| C  | -2.94141000 | -1.73727200 | 1.95478200  |
| H  | -2.28785800 | -1.23985400 | 2.69500000  |
| H  | -3.92720500 | -1.26197000 | 2.02327300  |
| H  | -3.05907400 | -2.78931300 | 2.25114900  |
| C  | -0.98212000 | 4.09604300  | -0.87262600 |
| C  | -1.65752400 | 2.87976300  | -0.67654500 |
| H  | -1.41301300 | 5.07933900  | -1.00086000 |
| H  | -2.71831900 | 2.67247000  | -0.59883700 |
| N  | 0.44439700  | 2.42701200  | -0.67040300 |
| C  | 1.15469700  | 0.20929300  | -0.21512700 |
| C  | 1.53372500  | 1.54258600  | -0.51392300 |
| C  | 2.25205900  | -0.65758500 | -0.05464700 |
| C  | 2.84250000  | 1.99424400  | -0.64815700 |
| C  | 3.58052800  | -0.24530500 | -0.16642400 |
| H  | 2.07811500  | -1.70361400 | 0.20210700  |
| C  | 3.88226700  | 1.09353900  | -0.46778600 |
| H  | 3.05861200  | 3.03195900  | -0.90211500 |
| H  | 4.90945300  | 1.41895800  | -0.63122800 |
| H  | 1.06847500  | -1.31050800 | 2.71399700  |
| C  | 4.65407200  | -1.24758900 | 0.03563000  |
| O  | 4.55571500  | -2.43193400 | -0.17139200 |
| O  | 5.83487900  | -0.74605500 | 0.49831400  |
| C  | 0.05418100  | 2.10167600  | 2.77705900  |
| H  | -0.10594000 | 2.74114600  | 3.65616400  |
| H  | 1.01461400  | 1.58648400  | 2.89967000  |
| H  | 0.09813100  | 2.73620700  | 1.88158100  |
| C  | -1.07943100 | 1.07795500  | 2.70777500  |
| H  | -0.66924900 | 0.42472700  | 1.58486700  |
| H  | -2.00631400 | 1.53398600  | 2.26006300  |
| O  | -1.21047000 | 0.26702700  | 3.67195800  |
| H  | 0.62316100  | -0.97386600 | 3.21741600  |
| C  | 0.35780300  | 3.77098000  | -0.85813000 |
| N  | -0.78854200 | 1.87310200  | -0.55705500 |
| H  | 1.24259100  | 4.38461400  | -0.95498000 |
| Ru | -0.85756300 | -0.16386900 | -0.07623600 |
| H  | 5.68360000  | 0.17075500  | 0.76172400  |

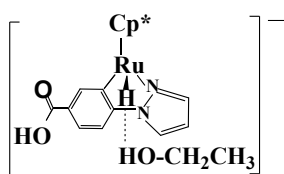

**Ru-17**

57

**E=-1285.51041(au)**

|   |             |             |             |
|---|-------------|-------------|-------------|
| C | 1.62179400  | -1.70704600 | 1.51354700  |
| C | 2.51519000  | -1.54587300 | 0.38504000  |
| C | 1.85844900  | -2.08624500 | -0.75838500 |
| C | 0.43307200  | -2.35655900 | 1.05562000  |
| C | 0.56358900  | -2.58248400 | -0.36460900 |
| C | 3.89720400  | -0.97856200 | 0.42919400  |
| H | 4.67292200  | -1.75865000 | 0.49948500  |
| H | 4.10410400  | -0.37437000 | -0.46416000 |
| H | 4.02460500  | -0.32615100 | 1.30428500  |
| C | 1.92683600  | -1.28572400 | 2.91213700  |
| H | 1.02203000  | -1.29395400 | 3.53123200  |
| H | 2.66861600  | -1.94106800 | 3.39520900  |
| H | 2.32554000  | -0.26164600 | 2.94524800  |
| C | -0.73389500 | -2.77884400 | 1.88523200  |
| H | -1.68159600 | -2.58844500 | 1.36518200  |
| H | -0.70018000 | -3.85163200 | 2.13020200  |
| H | -0.77315600 | -2.22043800 | 2.82846500  |
| C | -0.36978200 | -3.36870100 | -1.22306100 |
| H | -0.40145100 | -2.96662600 | -2.24320300 |
| H | -0.08348900 | -4.43132900 | -1.29099000 |
| H | -1.39446000 | -3.33472900 | -0.83216500 |
| C | 2.44409400  | -2.22195700 | -2.12584500 |
| H | 1.67076900  | -2.11783000 | -2.89601500 |
| H | 3.19918500  | -1.45306500 | -2.32025200 |
| H | 2.91630600  | -3.20822200 | -2.25762200 |
| C | 1.37232100  | 3.51270200  | 1.62701300  |
| C | 1.84549000  | 2.24957400  | 1.23167800  |
| H | 1.94591300  | 4.33328200  | 2.03595400  |
| H | 2.85150500  | 1.84690900  | 1.23787100  |
| N | -0.27473900 | 2.26310100  | 0.85895300  |
| C | -1.31179100 | 0.28695600  | 0.06167600  |
| C | -1.47726700 | 1.63251100  | 0.49123400  |
| C | -2.52811900 | -0.34076000 | -0.27557000 |
| C | -2.69422200 | 2.30001300  | 0.58102900  |
| C | -3.76881700 | 0.29475100  | -0.20587500 |
| H | -2.51610300 | -1.36782300 | -0.64342300 |
| C | -3.85672300 | 1.63077300  | 0.22640900  |
| H | -2.74605300 | 3.32916100  | 0.93744900  |
| H | -4.82056400 | 2.12143900  | 0.36232700  |
| H | 0.46220700  | 0.24592900  | -1.51606400 |
| C | -4.97710500 | -0.46274900 | -0.60704100 |

|    |             |             |             |
|----|-------------|-------------|-------------|
| O  | -5.10357900 | -1.66246200 | -0.56913000 |
| O  | -6.01297800 | 0.30052400  | -1.06334900 |
| C  | 1.85277200  | 3.15940300  | -2.23698900 |
| H  | 1.54390900  | 3.07697800  | -3.28590300 |
| H  | 1.03391000  | 2.77170000  | -1.61715200 |
| H  | 1.99961400  | 4.21971200  | -1.99176500 |
| C  | 3.11689900  | 2.35739500  | -1.99134700 |
| H  | 3.44185100  | 2.51176600  | -0.94400100 |
| H  | 3.93333500  | 2.73300900  | -2.62776000 |
| O  | 2.96540300  | 0.99655400  | -2.28528700 |
| H  | 2.18040900  | 0.66206000  | -1.78993200 |
| C  | 0.01815500  | 3.49118900  | 1.37525900  |
| N  | 0.84370400  | 1.49543500  | 0.75957500  |
| H  | -0.74977400 | 4.23778100  | 1.52220300  |
| Ru | 0.59755200  | -0.41775200 | -0.00240700 |
| H  | -5.68460700 | 1.20210200  | -1.17443900 |

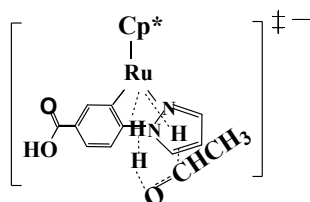

**Ru-TS<sub>17-18</sub>**

**57 -361.90i cm<sup>-1</sup>**

**E=-1285.4653164(au)**

|   |             |             |             |
|---|-------------|-------------|-------------|
| C | -1.70771700 | -1.29442800 | -1.69208500 |
| C | -2.71959600 | -1.15863900 | -0.66162700 |
| C | -2.24420800 | -1.83632800 | 0.49514000  |
| C | -0.64379400 | -2.12643800 | -1.16959000 |
| C | -0.96286900 | -2.44061500 | 0.19850400  |
| C | -4.01989700 | -0.43464000 | -0.77438000 |
| H | -4.85468800 | -1.10701700 | -1.02774500 |
| H | -4.27199100 | 0.06698700  | 0.16875600  |
| H | -3.98332900 | 0.33672800  | -1.55540400 |
| C | -1.81666300 | -0.79152400 | -3.09226800 |
| H | -0.82429100 | -0.62003100 | -3.52560000 |
| H | -2.35267300 | -1.49803600 | -3.74481600 |
| H | -2.35302100 | 0.16489900  | -3.13202400 |
| C | 0.52465700  | -2.64236300 | -1.93901500 |
| H | 1.40096400  | -2.78526800 | -1.29560000 |
| H | 0.29952400  | -3.60939700 | -2.41305900 |
| H | 0.82390000  | -1.94207100 | -2.72807700 |
| C | -0.19874900 | -3.32957400 | 1.12069100  |
| H | -0.24312900 | -2.95419300 | 2.14953100  |

|    |             |             |             |
|----|-------------|-------------|-------------|
| H  | -0.58783500 | -4.36006000 | 1.11875700  |
| H  | 0.86055100  | -3.38043100 | 0.84027900  |
| C  | -2.94575100 | -1.90710700 | 1.81332100  |
| H  | -2.56697000 | -1.15690600 | 2.53551100  |
| H  | -4.02191100 | -1.73513400 | 1.68660000  |
| H  | -2.82097200 | -2.90129700 | 2.26252500  |
| C  | -1.11378900 | 3.88934300  | -1.26007200 |
| C  | -1.71561700 | 2.64882600  | -0.99467800 |
| H  | -1.60034500 | 4.82063900  | -1.51403700 |
| H  | -2.76325000 | 2.37238200  | -0.96491400 |
| N  | 0.40266600  | 2.36286800  | -0.78260900 |
| C  | 1.24451200  | 0.24433100  | -0.11870200 |
| C  | 1.54033700  | 1.57618800  | -0.48892800 |
| C  | 2.38193600  | -0.52686300 | 0.17276900  |
| C  | 2.82130500  | 2.11416300  | -0.57895200 |
| C  | 3.68356200  | -0.02738300 | 0.10688100  |
| H  | 2.26163000  | -1.56226300 | 0.49612600  |
| C  | 3.90656000  | 1.30580800  | -0.27513900 |
| H  | 2.98119400  | 3.14523600  | -0.89336700 |
| H  | 4.91652700  | 1.69544300  | -0.40160000 |
| H  | -0.07015600 | -0.45710400 | 2.11889200  |
| C  | 4.80926800  | -0.93438400 | 0.43541000  |
| O  | 4.79869400  | -2.13417300 | 0.31078400  |
| O  | 5.92826700  | -0.32191500 | 0.91588300  |
| C  | -1.35907500 | 2.74435200  | 2.59967700  |
| H  | -1.68855700 | 3.26081900  | 3.51159900  |
| H  | -0.27085100 | 2.60279900  | 2.67316600  |
| H  | -1.57228300 | 3.38831400  | 1.73117800  |
| C  | -2.02586700 | 1.36829000  | 2.48556900  |
| H  | -1.62355700 | 0.94558300  | 1.48270500  |
| H  | -3.11997100 | 1.50558400  | 2.24352900  |
| O  | -1.77596000 | 0.54612800  | 3.49266900  |
| H  | -0.53236800 | -0.22339900 | 2.75709500  |
| C  | 0.23969600  | 3.67063000  | -1.11083900 |
| N  | -0.79235200 | 1.73054000  | -0.70847800 |
| H  | 1.08473300  | 4.33815800  | -1.20552900 |
| Ru | -0.75368300 | -0.29529100 | -0.07795600 |
| H  | 5.70552200  | 0.59777700  | 1.10835500  |

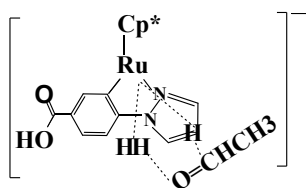

**Ru-18**

57

**E=-1285.4717936(au)**

|   |             |             |             |
|---|-------------|-------------|-------------|
| C | -2.05781900 | -1.07620500 | -1.64984300 |
| C | -2.93338300 | -0.89017000 | -0.51021900 |
| C | -2.39307600 | -1.64218200 | 0.57070200  |
| C | -1.00571400 | -1.97634900 | -1.26414200 |
| C | -1.19565000 | -2.31330200 | 0.12490800  |
| C | -4.19134800 | -0.08645800 | -0.49341900 |
| H | -5.08023000 | -0.68628900 | -0.74633600 |
| H | -4.36355200 | 0.36051500  | 0.49414600  |
| H | -4.14704600 | 0.73749800  | -1.21874600 |
| C | -2.27915200 | -0.49946200 | -3.00831500 |
| H | -1.34470000 | -0.46980400 | -3.58080200 |
| H | -3.01266400 | -1.07777900 | -3.59211000 |
| H | -2.65014600 | 0.53261400  | -2.94679800 |
| C | 0.05584600  | -2.53249300 | -2.15255300 |
| H | 0.98524100  | -2.71601700 | -1.59979300 |
| H | -0.25223900 | -3.48689100 | -2.60557500 |
| H | 0.30433600  | -1.83814000 | -2.96445500 |
| C | -0.42906900 | -3.31412900 | 0.92153500  |
| H | -0.39499900 | -3.02826100 | 1.97929000  |
| H | -0.87397000 | -4.32052000 | 0.85865800  |
| H | 0.60911000  | -3.39675900 | 0.57589300  |
| C | -2.94141000 | -1.73727200 | 1.95478200  |
| H | -2.28785800 | -1.23985400 | 2.69500000  |
| H | -3.92720500 | -1.26197000 | 2.02327300  |
| H | -3.05907400 | -2.78931300 | 2.25114900  |
| C | -0.98212000 | 4.09604300  | -0.87262600 |
| C | -1.65752400 | 2.87976300  | -0.67654500 |
| H | -1.41301300 | 5.07933900  | -1.00086000 |
| H | -2.71831900 | 2.67247000  | -0.59883700 |
| N | 0.44439700  | 2.42701200  | -0.67040300 |
| C | 1.15469700  | 0.20929300  | -0.21512700 |
| C | 1.53372500  | 1.54258600  | -0.51392300 |
| C | 2.25205900  | -0.65758500 | -0.05464700 |
| C | 2.84250000  | 1.99424400  | -0.64815700 |
| C | 3.58052800  | -0.24530500 | -0.16642400 |
| H | 2.07811500  | -1.70361400 | 0.20210700  |
| C | 3.88226700  | 1.09353900  | -0.46778600 |
| H | 3.05861200  | 3.03195900  | -0.90211500 |
| H | 4.90945300  | 1.41895800  | -0.63122800 |
| H | 1.06847500  | -1.31050800 | 2.71399700  |
| C | 4.65407200  | -1.24758900 | 0.03563000  |
| O | 4.55571500  | -2.43193400 | -0.17139200 |

|    |             |             |             |
|----|-------------|-------------|-------------|
| O  | 5.83487900  | -0.74605500 | 0.49831400  |
| C  | 0.05418100  | 2.10167600  | 2.77705900  |
| H  | -0.10594000 | 2.74114600  | 3.65616400  |
| H  | 1.01461400  | 1.58648400  | 2.89967000  |
| H  | 0.09813100  | 2.73620700  | 1.88158100  |
| C  | -1.07943100 | 1.07795500  | 2.70777500  |
| H  | -0.66924900 | 0.42472700  | 1.58486700  |
| H  | -2.00631400 | 1.53398600  | 2.26006300  |
| O  | -1.21047000 | 0.26702700  | 3.67195800  |
| H  | 0.62316100  | -0.97386600 | 3.21741600  |
| C  | 0.35780300  | 3.77098000  | -0.85813000 |
| N  | -0.78854200 | 1.87310200  | -0.55705500 |
| H  | 1.24259100  | 4.38461400  | -0.95498000 |
| Ru | -0.85756300 | -0.16386900 | -0.07623600 |
| H  | 5.68360000  | 0.17075500  | 0.76172400  |

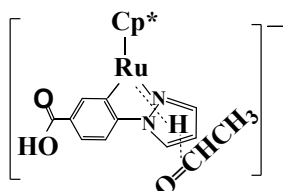

**Ru-19**

**55**

**E=-1284.2974388(au)**

|   |             |             |             |
|---|-------------|-------------|-------------|
| C | -2.37113000 | -0.58524000 | -1.59495300 |
| C | -3.08478000 | -0.66410400 | -0.33648200 |
| C | -2.41702500 | -1.62469600 | 0.47376800  |
| C | -1.29250200 | -1.53219400 | -1.55650600 |
| C | -1.30075600 | -2.17023700 | -0.26365000 |
| C | -4.33916700 | 0.07267900  | -0.00395900 |
| H | -5.24270900 | -0.46696400 | -0.33188500 |
| H | -4.43090300 | 0.24066400  | 1.07649000  |
| H | -4.36525200 | 1.05740100  | -0.48958400 |
| C | -2.76535900 | 0.27692500  | -2.74756000 |
| H | -1.92673300 | 0.41925600  | -3.43922100 |
| H | -3.60496700 | -0.14666600 | -3.32214400 |
| H | -3.07342600 | 1.27562800  | -2.40802100 |
| C | -0.35630500 | -1.84898100 | -2.67427700 |
| H | 0.64733100  | -2.08703800 | -2.30204800 |
| H | -0.70294900 | -2.71011400 | -3.26526200 |
| H | -0.24541700 | -0.99558400 | -3.35440500 |
| C | -0.41628800 | -3.26811700 | 0.22581400  |
| H | -0.05636900 | -3.04481500 | 1.24050700  |
| H | -0.93923600 | -4.23771900 | 0.25094700  |
| H | 0.46095600  | -3.39161600 | -0.42128100 |



|    |             |             |             |
|----|-------------|-------------|-------------|
| C  | -2.79029000 | -2.05683300 | 1.85252400  |
| H  | -1.89063600 | -2.20678800 | 2.46721200  |
| H  | -3.42367100 | -1.31125200 | 2.34989300  |
| H  | -3.34752300 | -3.00611000 | 1.82934100  |
| C  | -1.01577900 | 4.30901100  | 0.11793000  |
| C  | -1.70672400 | 3.08614100  | 0.15765900  |
| H  | -1.42741200 | 5.30510800  | 0.20615000  |
| H  | -2.76246300 | 2.88704900  | 0.29487100  |
| N  | 0.37103500  | 2.61180800  | -0.11696600 |
| C  | 1.03943300  | 0.34208700  | -0.27635800 |
| C  | 1.43951300  | 1.70250700  | -0.26332600 |
| C  | 2.11466500  | -0.55954500 | -0.39308700 |
| C  | 2.75305200  | 2.14953500  | -0.35567400 |
| C  | 3.44756900  | -0.15331000 | -0.47865500 |
| H  | 1.91926600  | -1.63261500 | -0.37572400 |
| C  | 3.77282000  | 1.21377000  | -0.46153300 |
| H  | 2.98988300  | 3.21365500  | -0.34941100 |
| H  | 4.79997900  | 1.55236300  | -0.59642700 |
| C  | 4.50249300  | -1.18931500 | -0.59061100 |
| O  | 4.36447200  | -2.28160900 | -1.08273700 |
| O  | 5.71780200  | -0.83453100 | -0.08163700 |
| C  | 1.11844500  | 0.56325000  | 3.14496300  |
| H  | 1.53426200  | 0.50089300  | 4.16122700  |
| H  | 1.91542500  | 0.32386900  | 2.43137100  |
| H  | 0.76757500  | 1.58826400  | 2.96633400  |
| C  | -0.01319200 | -0.44373300 | 3.02174900  |
| H  | -0.44563000 | -0.00051900 | 1.64404200  |
| H  | -0.98199500 | -0.05649500 | 3.43499800  |
| O  | 0.22241500  | -1.66746700 | 3.07219300  |
| C  | 0.30899800  | 3.96982200  | -0.05478100 |
| N  | -0.86271200 | 2.06011800  | 0.01419000  |
| H  | 1.19888300  | 4.57886500  | -0.13326000 |
| Ru | -0.94840900 | -0.03654800 | -0.00401200 |
| H  | 5.60181700  | -0.01176500 | 0.41075800  |

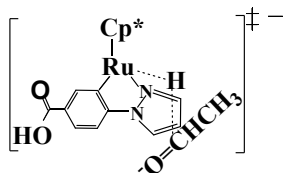

**Ru-TS<sub>19-20</sub>**

**55 -81.02i cm<sup>-1</sup>**

**E=-1284.2923062(au)**

|   |             |             |             |
|---|-------------|-------------|-------------|
| C | -2.37113000 | -0.58524000 | -1.59495300 |
| C | -3.08478000 | -0.66410400 | -0.33648200 |

|   |             |             |             |
|---|-------------|-------------|-------------|
| C | -2.41702500 | -1.62469600 | 0.47376800  |
| C | -1.29250200 | -1.53219400 | -1.55650600 |
| C | -1.30075600 | -2.17023700 | -0.26365000 |
| C | -4.33916700 | 0.07267900  | -0.00395900 |
| H | -5.24270900 | -0.46696400 | -0.33188500 |
| H | -4.43090300 | 0.24066400  | 1.07649000  |
| H | -4.36525200 | 1.05740100  | -0.48958400 |
| C | -2.76535900 | 0.27692500  | -2.74756000 |
| H | -1.92673300 | 0.41925600  | -3.43922100 |
| H | -3.60496700 | -0.14666600 | -3.32214400 |
| H | -3.07342600 | 1.27562800  | -2.40802100 |
| C | -0.35630500 | -1.84898100 | -2.67427700 |
| H | 0.64733100  | -2.08703800 | -2.30204800 |
| H | -0.70294900 | -2.71011400 | -3.26526200 |
| H | -0.24541700 | -0.99558400 | -3.35440500 |
| C | -0.41628800 | -3.26811700 | 0.22581400  |
| H | -0.05636900 | -3.04481500 | 1.24050700  |
| H | -0.93923600 | -4.23771900 | 0.25094700  |
| H | 0.46095600  | -3.39161600 | -0.42128100 |
| C | -2.79029000 | -2.05683300 | 1.85252400  |
| H | -1.89063600 | -2.20678800 | 2.46721200  |
| H | -3.42367100 | -1.31125200 | 2.34989300  |
| H | -3.34752300 | -3.00611000 | 1.82934100  |
| C | -1.01577900 | 4.30901100  | 0.11793000  |
| C | -1.70672400 | 3.08614100  | 0.15765900  |
| H | -1.42741200 | 5.30510800  | 0.20615000  |
| H | -2.76246300 | 2.88704900  | 0.29487100  |
| N | 0.37103500  | 2.61180800  | -0.11696600 |
| C | 1.03943300  | 0.34208700  | -0.27635800 |
| C | 1.43951300  | 1.70250700  | -0.26332600 |
| C | 2.11466500  | -0.55954500 | -0.39308700 |
| C | 2.75305200  | 2.14953500  | -0.35567400 |
| C | 3.44756900  | -0.15331000 | -0.47865500 |
| H | 1.91926600  | -1.63261500 | -0.37572400 |
| C | 3.77282000  | 1.21377000  | -0.46153300 |
| H | 2.98988300  | 3.21365500  | -0.34941100 |
| H | 4.79997900  | 1.55236300  | -0.59642700 |
| C | 4.50249300  | -1.18931500 | -0.59061100 |
| O | 4.36447200  | -2.28160900 | -1.08273700 |
| O | 5.71780200  | -0.83453100 | -0.08163700 |
| C | 1.11844500  | 0.56325000  | 3.14496300  |
| H | 1.53426200  | 0.50089300  | 4.16122700  |
| H | 1.91542500  | 0.32386900  | 2.43137100  |
| H | 0.76757500  | 1.58826400  | 2.96633400  |

|    |             |             |             |
|----|-------------|-------------|-------------|
| C  | -0.01319200 | -0.44373300 | 3.02174900  |
| H  | -0.44563000 | -0.00051900 | 1.64404200  |
| H  | -0.98199500 | -0.05649500 | 3.43499800  |
| O  | 0.22241500  | -1.66746700 | 3.07219300  |
| C  | 0.30899800  | 3.96982200  | -0.05478100 |
| N  | -0.86271200 | 2.06011800  | 0.01419000  |
| H  | 1.19888300  | 4.57886500  | -0.13326000 |
| Ru | -0.94840900 | -0.03654800 | -0.00401200 |
| H  | 5.60181700  | -0.01176500 | 0.41075800  |

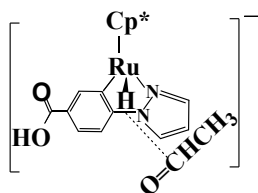

**Ru-20**

**55**

**E=-1284.2965279(au)**

|   |             |             |             |
|---|-------------|-------------|-------------|
| C | -2.62958700 | -0.39489700 | -1.41560300 |
| C | -3.11518000 | -0.77291400 | -0.10740600 |
| C | -2.24717200 | -1.79883700 | 0.38051800  |
| C | -1.50688900 | -1.21866400 | -1.74122600 |
| C | -1.25159900 | -2.08562400 | -0.61582600 |
| C | -4.35615300 | -0.26096300 | 0.54441400  |
| H | -5.25653500 | -0.82760700 | 0.25134900  |
| H | -4.28013700 | -0.30794600 | 1.63794700  |
| H | -4.54272100 | 0.78864500  | 0.27910300  |
| C | -3.25614900 | 0.64747300  | -2.28104500 |
| H | -2.58199000 | 0.94749900  | -3.09193400 |
| H | -4.19726000 | 0.30246200  | -2.73759400 |
| H | -3.48605300 | 1.55465700  | -1.70395600 |
| C | -0.73982700 | -1.22588600 | -3.02128800 |
| H | 0.33331000  | -1.36481700 | -2.84041100 |
| H | -1.06741100 | -2.03159000 | -3.69707800 |
| H | -0.85072300 | -0.27518200 | -3.55695300 |
| C | -0.25958200 | -3.19928000 | -0.55965200 |
| H | 0.19031800  | -3.28418100 | 0.43714600  |
| H | -0.71734500 | -4.17102500 | -0.80690000 |
| H | 0.55819900  | -3.04082100 | -1.27389100 |
| C | -2.38918300 | -2.53682100 | 1.67087400  |
| H | -1.41026100 | -2.84970100 | 2.05393400  |
| H | -2.86126000 | -1.91050900 | 2.43837400  |
| H | -3.00744900 | -3.44006400 | 1.54906100  |
| C | -1.23941900 | 4.28269400  | 0.64496300  |
| C | -1.88610400 | 3.04100100  | 0.51811900  |

|    |             |             |             |
|----|-------------|-------------|-------------|
| H  | -1.68996500 | 5.24522200  | 0.84606300  |
| H  | -2.93399500 | 2.78645700  | 0.61754600  |
| N  | 0.21523200  | 2.67624600  | 0.23990100  |
| C  | 0.95272500  | 0.46856400  | -0.21090800 |
| C  | 1.30897400  | 1.83699300  | -0.04047700 |
| C  | 2.05749800  | -0.35348500 | -0.52608700 |
| C  | 2.59747200  | 2.34869100  | -0.13821000 |
| C  | 3.36589000  | 0.12215000  | -0.63684200 |
| H  | 1.90820500  | -1.42699300 | -0.65128000 |
| C  | 3.64518000  | 1.48662400  | -0.43396100 |
| H  | 2.79077200  | 3.41359700  | -0.00447900 |
| H  | 4.64571900  | 1.89048900  | -0.58883700 |
| C  | 4.44814700  | -0.83924200 | -0.95531300 |
| O  | 4.31941000  | -1.87068100 | -1.56758800 |
| O  | 5.68469900  | -0.49088800 | -0.49169700 |
| C  | 1.87512800  | -0.35822200 | 2.99541000  |
| H  | 2.57371200  | -0.53313300 | 3.82598300  |
| H  | 2.43262000  | -0.41353900 | 2.05354600  |
| H  | 1.43368500  | 0.63747600  | 3.09731500  |
| C  | 0.82336100  | -1.42931800 | 3.02350100  |
| H  | -0.59147500 | 0.00982700  | 1.65789100  |
| H  | -0.14135200 | -1.14761800 | 3.50438500  |
| O  | 1.01116900  | -2.56411900 | 2.63628100  |
| C  | 0.10063000  | 4.01573300  | 0.46617600  |
| N  | -0.99974800 | 2.06977300  | 0.27264400  |
| H  | 0.96880400  | 4.66008500  | 0.48242100  |
| Ru | -1.00479600 | 0.00114100  | 0.05818200  |
| H  | 5.57203900  | 0.26684500  | 0.09664800  |

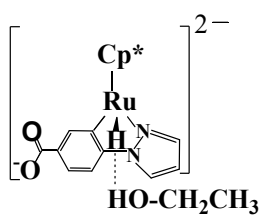

### Ru-21

56

E=-1285.0530838(au)

|   |            |             |             |
|---|------------|-------------|-------------|
| C | 1.46871900 | -1.62103200 | 1.63181100  |
| C | 2.39742300 | -1.64079400 | 0.52068000  |
| C | 1.70375200 | -2.21054500 | -0.59244600 |
| C | 0.23449800 | -2.20715000 | 1.20835200  |
| C | 0.36813300 | -2.56666800 | -0.18613700 |
| C | 3.83407900 | -1.23823900 | 0.56579500  |
| H | 4.50711600 | -2.06344300 | 0.86556600  |

|   |             |             |             |
|---|-------------|-------------|-------------|
| H | 4.16997400  | -0.87066900 | -0.41292500 |
| H | 3.99309300  | -0.42219800 | 1.28569000  |
| C | 1.78622900  | -1.10007800 | 2.99379400  |
| H | 0.87342700  | -0.98106700 | 3.59013800  |
| H | 2.46883500  | -1.76313200 | 3.55216800  |
| H | 2.26303200  | -0.10975300 | 2.94304800  |
| C | -0.98553400 | -2.44317000 | 2.03501300  |
| H | -1.89403200 | -2.17458700 | 1.47961900  |
| H | -1.08170800 | -3.49604000 | 2.34796900  |
| H | -0.97677700 | -1.82335700 | 2.94088200  |
| C | -0.62036500 | -3.33880200 | -0.99377100 |
| H | -0.61109000 | -3.01573900 | -2.04225400 |
| H | -0.42389100 | -4.42563600 | -0.97340700 |
| H | -1.64272600 | -3.18209500 | -0.62941600 |
| C | 2.29294500  | -2.51228400 | -1.93224900 |
| H | 3.08726800  | -1.80307400 | -2.19173900 |
| H | 2.71436800  | -3.53121400 | -1.96956800 |
| H | 1.52845100  | -2.44015600 | -2.71536500 |
| C | 1.37355400  | 3.60923700  | 1.47812500  |
| C | 1.84124700  | 2.32517600  | 1.16253200  |
| H | 1.93964800  | 4.44462400  | 1.86975700  |
| H | 2.84078500  | 1.91117000  | 1.22460700  |
| N | -0.26240100 | 2.34031000  | 0.70649200  |
| C | -1.33012700 | 0.37067300  | -0.08372900 |
| C | -1.47397500 | 1.71470900  | 0.31855900  |
| C | -2.55047800 | -0.24875600 | -0.42941500 |
| C | -2.69005800 | 2.40053300  | 0.38235000  |
| C | -3.79315500 | 0.38217600  | -0.36000200 |
| H | -2.56316000 | -1.28219000 | -0.77857800 |
| C | -3.85048700 | 1.72396900  | 0.04271800  |
| H | -2.72890400 | 3.44619800  | 0.70050300  |
| H | -4.83409100 | 2.18912600  | 0.07668200  |
| H | 0.58268200  | 0.24233800  | -1.55867200 |
| C | -5.10486300 | -0.36167800 | -0.70739200 |
| O | -4.98598700 | -1.56774700 | -1.02168800 |
| O | -6.14963300 | 0.33049000  | -0.62874000 |
| C | 2.35121300  | 2.97493400  | -2.17542500 |
| H | 2.15724400  | 3.08224500  | -3.25008800 |
| H | 1.41941300  | 2.65492300  | -1.69199200 |
| H | 2.63444400  | 3.95290500  | -1.76196500 |
| C | 3.43087300  | 1.93668500  | -1.93071300 |
| H | 3.64602400  | 1.89738800  | -0.84541300 |
| H | 4.36958400  | 2.23925800  | -2.42504400 |
| O | 3.09228500  | 0.67426400  | -2.42854100 |

|    |             |             |             |
|----|-------------|-------------|-------------|
| H  | 2.25782900  | 0.40386800  | -1.96893300 |
| C  | 0.02481300  | 3.58433100  | 1.17022400  |
| N  | 0.84442100  | 1.56029100  | 0.68619100  |
| H  | -0.74553400 | 4.33923100  | 1.24856400  |
| Ru | 0.59251400  | -0.39587600 | -0.01679300 |

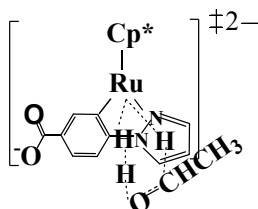

**Ru-TS<sub>21-22</sub>**

**56 -254.86i cm<sup>-1</sup>**

**E=-1285.0108456(au)**

|   |             |             |             |
|---|-------------|-------------|-------------|
| C | -1.39601100 | -1.35104000 | -1.78834900 |
| C | -2.49941200 | -1.36921700 | -0.84924500 |
| C | -2.03615200 | -2.02269500 | 0.33016400  |
| C | -0.28461400 | -2.08103100 | -1.20363100 |
| C | -0.67882800 | -2.47876100 | 0.12386500  |
| C | -3.86231900 | -0.79205300 | -1.03968100 |
| H | -4.61743000 | -1.55588400 | -1.29419900 |
| H | -4.20262000 | -0.28169300 | -0.12808700 |
| H | -3.87033600 | -0.05135600 | -1.85122700 |
| C | -1.44105100 | -0.80318700 | -3.17561600 |
| H | -0.44241100 | -0.49128300 | -3.50430500 |
| H | -1.82304600 | -1.53869400 | -3.90280700 |
| H | -2.08678400 | 0.08296200  | -3.23141800 |
| C | 0.99082400  | -2.44304500 | -1.88600600 |
| H | 1.83009500  | -2.47707000 | -1.18113200 |
| H | 0.92005800  | -3.42471000 | -2.38112400 |
| H | 1.25836800  | -1.69891000 | -2.64593800 |
| C | 0.11418300  | -3.29928600 | 1.08461500  |
| H | -0.06460000 | -2.97073000 | 2.11527700  |
| H | -0.13766300 | -4.37148600 | 1.02393800  |
| H | 1.19055500  | -3.20017200 | 0.90026700  |
| C | -2.83785000 | -2.21557200 | 1.57697000  |
| H | -2.84961900 | -1.31366600 | 2.22961300  |
| H | -3.87803400 | -2.46977700 | 1.32559600  |
| H | -2.43070400 | -3.04368400 | 2.17164000  |
| C | -1.18932800 | 3.86709400  | -1.22992300 |
| C | -1.73682800 | 2.59093200  | -1.04937600 |
| H | -1.70331600 | 4.78006600  | -1.49905100 |
| H | -2.76605000 | 2.25449000  | -1.10420500 |
| N | 0.36917000  | 2.41420300  | -0.65165400 |

|    |             |             |             |
|----|-------------|-------------|-------------|
| C  | 1.29776200  | 0.34467200  | 0.07597500  |
| C  | 1.53640600  | 1.68152300  | -0.28802000 |
| C  | 2.45872000  | -0.37169800 | 0.41930100  |
| C  | 2.79818900  | 2.27789100  | -0.33056600 |
| C  | 3.74585100  | 0.16534200  | 0.37018300  |
| H  | 2.39327300  | -1.41365700 | 0.73741700  |
| C  | 3.90250800  | 1.50617500  | -0.00061700 |
| H  | 2.91807600  | 3.32201000  | -0.63055600 |
| H  | 4.91845400  | 1.89649300  | -0.02432100 |
| H  | -0.34822800 | -0.28116800 | 2.25511800  |
| C  | 4.99502100  | -0.69591600 | 0.67334200  |
| O  | 4.77638900  | -1.90668100 | 0.90255700  |
| O  | 6.08758300  | -0.08096200 | 0.63919600  |
| C  | -2.18503300 | 2.64917800  | 2.47323000  |
| H  | -2.70042100 | 3.09726600  | 3.33584200  |
| H  | -1.11446200 | 2.58400800  | 2.71745200  |
| H  | -2.30076300 | 3.31516600  | 1.60200500  |
| C  | -2.71797100 | 1.23043800  | 2.21010700  |
| H  | -2.10066900 | 0.86321600  | 1.31081800  |
| H  | -3.75445200 | 1.33141400  | 1.74880700  |
| O  | -2.64433600 | 0.41649500  | 3.25208400  |
| H  | -0.95103200 | -0.16250300 | 2.75425300  |
| C  | 0.16143300  | 3.71380100  | -0.96075800 |
| N  | -0.78567600 | 1.71806100  | -0.70253900 |
| H  | 0.97711400  | 4.42373000  | -0.95696800 |
| Ru | -0.67995200 | -0.32232600 | -0.09045100 |

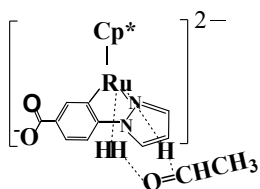

**Ru-22**

**56**

**E=-1285.0193568(au)**

|   |             |             |             |
|---|-------------|-------------|-------------|
| C | -1.88156300 | -1.09803900 | -1.71603100 |
| C | -2.76550100 | -1.16631800 | -0.57729000 |
| C | -2.08947800 | -1.93209000 | 0.42870600  |
| C | -0.69745900 | -1.87750600 | -1.43221400 |
| C | -0.83043500 | -2.39452000 | -0.08893600 |
| C | -4.12152100 | -0.55971500 | -0.43227300 |
| H | -4.93901900 | -1.27986700 | -0.61515900 |
| H | -4.25984700 | -0.15512000 | 0.57971300  |
| H | -4.26436100 | 0.27125100  | -1.13749700 |
| C | -2.17852400 | -0.40642400 | -3.00506500 |

|   |             |             |             |
|---|-------------|-------------|-------------|
| H | -1.25377600 | -0.06751800 | -3.48790600 |
| H | -2.71340000 | -1.05709200 | -3.71600400 |
| H | -2.79848000 | 0.48561400  | -2.84283000 |
| C | 0.42639700  | -2.17303900 | -2.36777600 |
| H | 1.38630800  | -2.17821600 | -1.83638600 |
| H | 0.30907800  | -3.14934500 | -2.86643200 |
| H | 0.50390000  | -1.40376300 | -3.14651200 |
| C | 0.09853800  | -3.34747400 | 0.58640700  |
| H | 0.21642000  | -3.10704600 | 1.65012200  |
| H | -0.25824600 | -4.38877100 | 0.51572200  |
| H | 1.10094800  | -3.31130000 | 0.14490000  |
| C | -2.62959800 | -2.19924900 | 1.79367200  |
| H | -2.60531000 | -1.28843300 | 2.43101300  |
| H | -3.67212700 | -2.54711800 | 1.73125800  |
| H | -2.04572500 | -2.97711100 | 2.30073500  |
| C | -1.04192700 | 4.04070900  | -0.97031900 |
| C | -1.67901400 | 2.80207400  | -0.81541800 |
| H | -1.49725000 | 5.00620000  | -1.14679500 |
| H | -2.73251100 | 2.54849800  | -0.81820300 |
| N | 0.43195200  | 2.43377500  | -0.61936300 |
| C | 1.22261800  | 0.27729500  | 0.00403900  |
| C | 1.55283700  | 1.59757900  | -0.35627100 |
| C | 2.34381600  | -0.53723000 | 0.26055100  |
| C | 2.85418100  | 2.08956400  | -0.47613800 |
| C | 3.66541500  | -0.10336300 | 0.13775700  |
| H | 2.21637300  | -1.57505500 | 0.57129300  |
| C | 3.90993100  | 1.22599200  | -0.22788000 |
| H | 3.03917300  | 3.12585800  | -0.77101800 |
| H | 4.95113300  | 1.53253800  | -0.31009700 |
| H | 0.19578400  | -1.17720000 | 2.98066800  |
| C | 4.85936700  | -1.06167600 | 0.36528400  |
| O | 4.56302000  | -2.25004600 | 0.62223200  |
| O | 5.99347200  | -0.53645600 | 0.25342000  |
| C | -0.61808700 | 2.17982100  | 2.86759200  |
| H | -1.05484300 | 2.87696100  | 3.59803500  |
| H | 0.20945700  | 1.64733200  | 3.35319900  |
| H | -0.21462500 | 2.75493700  | 2.02095700  |
| C | -1.69276900 | 1.17736700  | 2.41984500  |
| H | -1.02315900 | 0.50112700  | 1.62473400  |
| H | -2.39323700 | 1.70211200  | 1.70694100  |
| O | -2.23228000 | 0.45030000  | 3.34231100  |
| H | -0.31012400 | -0.88185100 | 3.45161100  |
| C | 0.30858500  | 3.76445900  | -0.83236100 |
| N | -0.77856800 | 1.83382200  | -0.60865800 |



|    |             |             |             |
|----|-------------|-------------|-------------|
| H  | 1.17864200  | 4.40636400  | -0.85402500 |
| Ru | -0.80757800 | -0.21106500 | -0.08306600 |

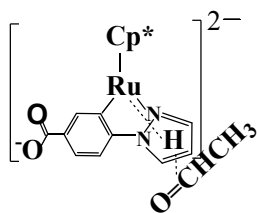

### Ru-23

54

**E=-1283.8435246(au)**

|   |             |             |             |
|---|-------------|-------------|-------------|
| C | -2.17639900 | -1.10095800 | -1.49428700 |
| C | -2.75039300 | -1.24206000 | -0.19224300 |
| C | -1.81088400 | -2.01181400 | 0.59776100  |
| C | -0.91684400 | -1.82032900 | -1.53670400 |
| C | -0.71236400 | -2.40688200 | -0.23206900 |
| C | -4.01917200 | -0.66490300 | 0.34520600  |
| H | -4.82155200 | -1.41896600 | 0.42185800  |
| H | -3.83920200 | -0.24376000 | 1.35084300  |
| H | -4.39496100 | 0.14331500  | -0.29878900 |
| C | -2.76923200 | -0.36450400 | -2.64963000 |
| H | -1.99623100 | 0.19472800  | -3.19285600 |
| H | -3.26070800 | -1.04231200 | -3.36589400 |
| H | -3.51931000 | 0.36267000  | -2.31270900 |
| C | -0.06226400 | -2.04003700 | -2.73914100 |
| H | 0.99638100  | -2.09666900 | -2.45910300 |
| H | -0.31877000 | -2.96916200 | -3.27754500 |
| H | -0.15973400 | -1.20752600 | -3.44774000 |
| C | 0.38434800  | -3.34584900 | 0.13782600  |
| H | 0.63896900  | -3.26611700 | 1.20105600  |
| H | 0.10355500  | -4.39278800 | -0.06316400 |
| H | 1.30587600  | -3.13510600 | -0.41603400 |
| C | -2.01511900 | -2.32946200 | 2.03958100  |
| H | -2.26609800 | -1.40865400 | 2.60165700  |
| H | -2.84342800 | -3.04538800 | 2.17145500  |
| H | -1.11315400 | -2.77285200 | 2.47802100  |
| C | -0.99863500 | 3.99641100  | -1.07730700 |
| C | -1.62641800 | 2.74883700  | -0.96213000 |
| H | -1.45707900 | 4.95717100  | -1.27045600 |
| H | -2.67451000 | 2.48056100  | -1.02160100 |
| N | 0.47535100  | 2.40564800  | -0.66180300 |
| C | 1.27123800  | 0.26009500  | 0.00940100  |
| C | 1.59488300  | 1.58114900  | -0.35762400 |
| C | 2.40130700  | -0.53265800 | 0.29601300  |

|    |             |             |             |
|----|-------------|-------------|-------------|
| C  | 2.89105400  | 2.09110500  | -0.45586200 |
| C  | 3.71953400  | -0.08159700 | 0.19656800  |
| H  | 2.28818700  | -1.56878700 | 0.61311200  |
| C  | 3.95412800  | 1.24679500  | -0.17746400 |
| H  | 3.06667600  | 3.12596800  | -0.76098900 |
| H  | 4.99228400  | 1.56740500  | -0.24443700 |
| C  | 4.91958400  | -1.02229900 | 0.45931000  |
| O  | 4.63218700  | -2.21031900 | 0.72837700  |
| O  | 6.05008800  | -0.48620800 | 0.36094600  |
| C  | -0.74663100 | 2.07230700  | 3.02765000  |
| H  | -1.21555700 | 2.79346700  | 3.71388900  |
| H  | -0.10817500 | 1.40212400  | 3.61658800  |
| H  | -0.11430400 | 2.61631500  | 2.30928500  |
| C  | -1.83323100 | 1.26011800  | 2.30835600  |
| H  | -1.11576000 | 0.58755300  | 1.56132500  |
| H  | -2.32960200 | 1.93645500  | 1.55124000  |
| O  | -2.62499900 | 0.54375700  | 3.04056500  |
| C  | 0.34638600  | 3.73561300  | -0.87265100 |
| N  | -0.72516900 | 1.79117100  | -0.71630500 |
| H  | 1.20807800  | 4.38857700  | -0.84353900 |
| Ru | -0.77342300 | -0.23450600 | -0.09161800 |

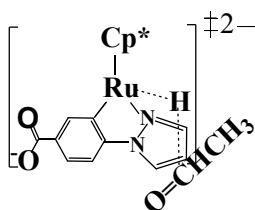

**Ru-TS<sub>23-24</sub>**

**54 -495.41i cm<sup>-1</sup>**

**E=-1283.8339995(au)**

|   |             |             |             |
|---|-------------|-------------|-------------|
| C | -2.16087100 | -1.16438300 | -1.47648500 |
| C | -2.74747500 | -1.23737500 | -0.16575000 |
| C | -1.82830700 | -1.98896400 | 0.65418400  |
| C | -0.93644000 | -1.92333100 | -1.49106600 |
| C | -0.73002200 | -2.43021000 | -0.15541400 |
| C | -4.03881900 | -0.65582200 | 0.30834300  |
| H | -4.86315500 | -1.39129500 | 0.32424900  |
| H | -3.92546700 | -0.25375100 | 1.32670700  |
| H | -4.36328900 | 0.17387600  | -0.33653300 |
| C | -2.75352600 | -0.47897300 | -2.66390300 |
| H | -1.97157300 | -0.01829900 | -3.28168500 |
| H | -3.32322500 | -1.17135100 | -3.30504200 |
| H | -3.43827600 | 0.32405000  | -2.36073600 |
| C | -0.07112200 | -2.20692900 | -2.67267100 |

|    |             |             |             |
|----|-------------|-------------|-------------|
| H  | 0.98767100  | -2.22606300 | -2.38548900 |
| H  | -0.30392800 | -3.17453600 | -3.15187400 |
| H  | -0.17737600 | -1.42640800 | -3.43723400 |
| C  | 0.35275600  | -3.36774300 | 0.25846200  |
| H  | 0.61517900  | -3.23601900 | 1.31485400  |
| H  | 0.05991800  | -4.42124000 | 0.11237300  |
| H  | 1.27460200  | -3.19664900 | -0.30899800 |
| C  | -2.05421700 | -2.31235500 | 2.09387700  |
| H  | -2.40813200 | -1.42931400 | 2.64336500  |
| H  | -2.80125100 | -3.11569000 | 2.21140000  |
| H  | -1.12462300 | -2.64672300 | 2.56961900  |
| C  | -1.00374700 | 3.94648200  | -1.20069000 |
| C  | -1.62996200 | 2.70636200  | -1.01019700 |
| H  | -1.46562200 | 4.89296800  | -1.45038100 |
| H  | -2.67830400 | 2.43496800  | -1.05765700 |
| N  | 0.47669400  | 2.38287200  | -0.70619200 |
| C  | 1.27653100  | 0.25115400  | -0.01631700 |
| C  | 1.59788800  | 1.57360400  | -0.38807600 |
| C  | 2.41116000  | -0.53484400 | 0.28321800  |
| C  | 2.89404800  | 2.08943900  | -0.47565200 |
| C  | 3.72642400  | -0.07726500 | 0.19293600  |
| H  | 2.29750800  | -1.56905100 | 0.60792300  |
| C  | 3.95851100  | 1.25279200  | -0.18502300 |
| H  | 3.06651000  | 3.12599100  | -0.77821900 |
| H  | 4.99547400  | 1.57933300  | -0.24064500 |
| C  | 4.93040600  | -1.00490900 | 0.48281800  |
| O  | 4.65148700  | -2.18871100 | 0.77936700  |
| O  | 6.05938600  | -0.46495100 | 0.37962000  |
| C  | -0.79020000 | 2.30919900  | 2.80885100  |
| H  | -1.21555800 | 3.15106800  | 3.37959600  |
| H  | -0.12949900 | 1.74359700  | 3.47355700  |
| H  | -0.20192200 | 2.70335700  | 1.97229700  |
| C  | -1.92665600 | 1.42736000  | 2.32732600  |
| H  | -0.79939800 | 0.43355700  | 1.49540200  |
| H  | -2.38438000 | 1.77463600  | 1.37419900  |
| O  | -2.59295100 | 0.74388500  | 3.12156700  |
| C  | 0.34329500  | 3.70218100  | -0.99407100 |
| N  | -0.72418800 | 1.76111600  | -0.71333900 |
| H  | 1.20473500  | 4.35580500  | -1.01462000 |
| Ru | -0.75126100 | -0.23634800 | -0.07028100 |

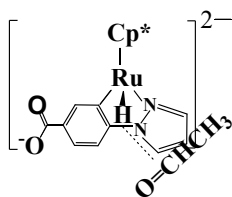

**Ru-24**

**54**

**E=-1283.8374356(au)**

|   |             |             |             |
|---|-------------|-------------|-------------|
| C | 1.51762800  | -1.63266100 | 1.60847900  |
| C | 2.46383300  | -1.51918400 | 0.51707200  |
| C | 1.83649100  | -2.05777800 | -0.64549100 |
| C | 0.33332100  | -2.26733400 | 1.11773200  |
| C | 0.51696500  | -2.52866300 | -0.29330100 |
| C | 3.86836600  | -1.02388800 | 0.63004000  |
| H | 4.57979700  | -1.81893200 | 0.91750200  |
| H | 4.22786700  | -0.59166600 | -0.31396400 |
| H | 3.95175100  | -0.23921600 | 1.39730100  |
| C | 1.77404700  | -1.15957400 | 3.00038800  |
| H | 0.84378600  | -1.12974900 | 3.58093600  |
| H | 2.49077100  | -1.79781300 | 3.54624200  |
| H | 2.18075500  | -0.13656500 | 2.99958200  |
| C | -0.87839000 | -2.64232500 | 1.90476300  |
| H | -1.79751100 | -2.39896900 | 1.35599500  |
| H | -0.90471600 | -3.71822400 | 2.14473400  |
| H | -0.92181100 | -2.08602700 | 2.84981700  |
| C | -0.40665900 | -3.30936000 | -1.16680200 |
| H | -0.35539700 | -2.96137700 | -2.20609700 |
| H | -0.18273600 | -4.39123200 | -1.16268900 |
| H | -1.44948200 | -3.18716600 | -0.84930500 |
| C | 2.46945400  | -2.19243100 | -1.99326800 |
| H | 3.19632700  | -1.39143200 | -2.17893900 |
| H | 2.99243800  | -3.15706400 | -2.10787300 |
| H | 1.71196400  | -2.12769900 | -2.78339300 |
| C | 1.29639600  | 3.66621800  | 1.41750300  |
| C | 1.77807600  | 2.37433600  | 1.15656800  |
| H | 1.85060400  | 4.51872700  | 1.78942400  |
| H | 2.77959600  | 1.96875000  | 1.24735200  |
| N | -0.32589800 | 2.35544000  | 0.68363200  |
| C | -1.36225000 | 0.34240000  | -0.03535900 |
| C | -1.52583300 | 1.70113800  | 0.31242200  |
| C | -2.57086200 | -0.30402400 | -0.37464200 |
| C | -2.75078200 | 2.37449500  | 0.33098400  |
| C | -3.82011800 | 0.31614800  | -0.35179900 |
| H | -2.56674300 | -1.35021400 | -0.68657700 |

|    |             |             |             |
|----|-------------|-------------|-------------|
| C  | -3.89762500 | 1.67217800  | -0.00111500 |
| H  | -2.80589900 | 3.43159800  | 0.60646400  |
| H  | -4.88667300 | 2.12677000  | -0.00280800 |
| C  | -5.11870000 | -0.44907600 | -0.70159800 |
| O  | -4.98492300 | -1.66304300 | -0.97701600 |
| O  | -6.17010200 | 0.23676800  | -0.66595300 |
| C  | 2.19750700  | 2.71447900  | -2.28948600 |
| H  | 2.10792300  | 3.44317200  | -1.47181400 |
| H  | 2.58676600  | 3.19152600  | -3.19479500 |
| H  | 1.18624400  | 2.31633600  | -2.44411100 |
| C  | 3.07886500  | 1.58591500  | -1.84785900 |
| H  | 0.49424900  | 0.24768000  | -1.52151100 |
| H  | 2.67297700  | 1.00762500  | -0.98528800 |
| O  | 4.12069500  | 1.27862300  | -2.40099000 |
| C  | -0.05036500 | 3.61995400  | 1.10073800  |
| N  | 0.78793600  | 1.58370300  | 0.70022400  |
| H  | -0.82685800 | 4.37104500  | 1.14881800  |
| Ru | 0.57700400  | -0.36860100 | 0.01395100  |

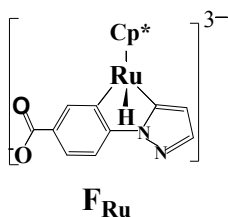

**46**

**E=-1129.5478198(au)**

|   |             |             |             |
|---|-------------|-------------|-------------|
| C | 2.19564500  | -0.57559800 | 1.34963500  |
| C | 3.00842300  | -0.66884600 | 0.15568500  |
| C | 2.41821900  | -1.67651800 | -0.67850900 |
| C | 1.12707300  | -1.52525600 | 1.23778100  |
| C | 1.27914900  | -2.24627400 | -0.00600700 |
| C | 4.30635600  | 0.03498600  | -0.05237700 |
| H | 5.16163000  | -0.44821400 | 0.47541400  |
| H | 4.56747600  | 0.08486100  | -1.11852900 |
| H | 4.25395300  | 1.07233100  | 0.30738500  |
| C | 2.46042400  | 0.36163600  | 2.48092500  |
| H | 1.57175600  | 0.46472900  | 3.11830500  |
| H | 3.30199900  | 0.04396400  | 3.12785700  |
| H | 2.69249100  | 1.37072600  | 2.10601800  |
| C | 0.05800000  | -1.79676000 | 2.24391100  |
| H | -0.92548900 | -1.86468700 | 1.75698800  |
| H | 0.22725800  | -2.73417400 | 2.80611100  |
| H | -0.01364800 | -0.97664700 | 2.97054800  |
| C | 0.48814500  | -3.43858000 | -0.42576900 |

|    |             |             |             |
|----|-------------|-------------|-------------|
| H  | 0.44267300  | -3.51993100 | -1.52049300 |
| H  | 0.89479500  | -4.39935300 | -0.04154700 |
| H  | -0.55127700 | -3.36644000 | -0.07875300 |
| C  | 2.97698500  | -2.16361000 | -1.97659900 |
| H  | 3.51423200  | -1.35907900 | -2.49735100 |
| H  | 3.67499700  | -3.01655300 | -1.85481500 |
| H  | 2.16918800  | -2.48469600 | -2.64679600 |
| C  | 0.82934500  | 4.23208700  | -0.13064300 |
| C  | 1.67990700  | 3.11661700  | -0.26687200 |
| H  | 1.09747300  | 5.28971200  | -0.06022700 |
| H  | 2.76327800  | 3.10977400  | -0.36451300 |
| N  | -0.41265200 | 2.53665200  | -0.20429600 |
| C  | -1.14229500 | 0.29983100  | -0.28344800 |
| C  | -1.51719100 | 1.66329500  | -0.17333600 |
| C  | -2.23043600 | -0.59715400 | -0.23804600 |
| C  | -2.83134000 | 2.09936900  | -0.03452900 |
| C  | -3.57561200 | -0.21005700 | -0.08439200 |
| H  | -2.05223000 | -1.67173500 | -0.33719100 |
| C  | -3.85845400 | 1.15579100  | 0.01210900  |
| H  | -3.02923800 | 3.17128600  | 0.04141700  |
| H  | -4.90385900 | 1.44508600  | 0.12354300  |
| H  | 0.57878900  | 0.17021600  | -2.03844300 |
| C  | -4.73095800 | -1.23086200 | -0.02614500 |
| O  | -4.42442000 | -2.44788300 | -0.10240000 |
| O  | -5.89265400 | -0.75174900 | 0.09582000  |
| C  | 0.84380500  | 1.98079600  | -0.32301500 |
| N  | -0.46233200 | 3.89673200  | -0.08726300 |
| Ru | 0.92077500  | -0.06152700 | -0.42871700 |

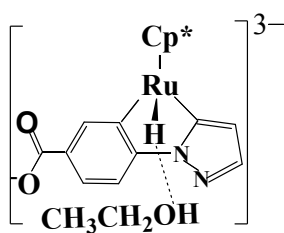

**55**

**E=-1284.5536511(au)**

|   |            |             |             |
|---|------------|-------------|-------------|
| C | 1.55922500 | -1.50177600 | 1.62168000  |
| C | 2.43650900 | -1.58452400 | 0.47519700  |
| C | 1.69627900 | -2.24569900 | -0.56475900 |
| C | 0.31512000 | -2.13883000 | 1.29107400  |
| C | 0.40491200 | -2.62671400 | -0.06794100 |
| C | 3.87461700 | -1.18801600 | 0.42404500  |
| H | 4.57645800 | -2.02972900 | 0.61687900  |

|   |             |             |             |
|---|-------------|-------------|-------------|
| H | 4.12829900  | -0.75871400 | -0.55561200 |
| H | 4.09014100  | -0.41589600 | 1.17716500  |
| C | 1.92380300  | -0.88390500 | 2.93121100  |
| H | 1.02598500  | -0.70624000 | 3.53785000  |
| H | 2.61778700  | -1.50693000 | 3.52704800  |
| H | 2.39239300  | 0.10101400  | 2.78299500  |
| C | -0.87058000 | -2.32431800 | 2.17924300  |
| H | -1.79898000 | -2.08393700 | 1.64194400  |
| H | -0.96162100 | -3.35597300 | 2.56852500  |
| H | -0.82514500 | -1.64310700 | 3.03980700  |
| C | -0.60547100 | -3.48208900 | -0.75389900 |
| H | -0.54499800 | -3.36826100 | -1.84455200 |
| H | -0.49032800 | -4.56295800 | -0.52697400 |
| H | -1.62709100 | -3.19668200 | -0.47020800 |
| C | 2.24982400  | -2.60661800 | -1.90642200 |
| H | 2.97662700  | -1.85694200 | -2.24403600 |
| H | 2.75212400  | -3.59331900 | -1.90371700 |
| H | 1.45217600  | -2.64077300 | -2.66016500 |
| C | 1.16686600  | 3.62634300  | 1.44060600  |
| C | 1.82098000  | 2.40575300  | 1.17708500  |
| H | 1.58616700  | 4.55061700  | 1.84473500  |
| H | 2.87588200  | 2.17941100  | 1.31712300  |
| N | -0.28640600 | 2.32216800  | 0.65683900  |
| C | -1.36576000 | 0.36796200  | -0.09212200 |
| C | -1.50962700 | 1.72481000  | 0.29126000  |
| C | -2.58154400 | -0.26556600 | -0.42181100 |
| C | -2.72761900 | 2.39635900  | 0.33754400  |
| C | -3.84099600 | 0.36102100  | -0.37152600 |
| H | -2.58377100 | -1.30779400 | -0.75230600 |
| C | -3.89354800 | 1.70592500  | 0.00619700  |
| H | -2.74437500 | 3.44447700  | 0.64479000  |
| H | -4.87495200 | 2.18004300  | 0.03401900  |
| H | 0.57839600  | 0.30548600  | -1.56778200 |
| C | -5.14718400 | -0.38493800 | -0.71581300 |
| O | -5.04577100 | -1.59862700 | -1.02673800 |
| O | -6.20905700 | 0.29356800  | -0.65101200 |
| C | 0.84616300  | 1.53412400  | 0.64101900  |
| N | -0.13029000 | 3.59284400  | 1.13143800  |
| C | 2.50028300  | 3.00645700  | -2.13061200 |
| H | 2.34344000  | 3.14143500  | -3.21033600 |
| H | 1.54075900  | 2.76132100  | -1.65714900 |
| H | 2.85445300  | 3.95278300  | -1.69575900 |
| C | 3.48466700  | 1.88054100  | -1.86958900 |
| H | 3.62569800  | 1.79386500  | -0.77669100 |

|    |            |             |             |
|----|------------|-------------|-------------|
| H  | 4.47078000 | 2.12513700  | -2.30908900 |
| O  | 3.07648100 | 0.66215100  | -2.42486800 |
| H  | 2.23578400 | 0.41205700  | -1.94780800 |
| Ru | 0.59659200 | -0.38272800 | -0.04176600 |

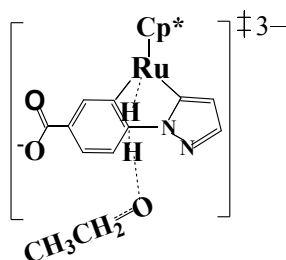

**Ru-TS<sub>25-26</sub>**

**55 -949.95i cm<sup>-1</sup>**

**E=-1284.5238377(au)**

|   |             |             |             |
|---|-------------|-------------|-------------|
| C | 1.48741000  | -1.29234300 | 1.73625300  |
| C | 2.38876100  | -1.55652500 | 0.64457200  |
| C | 1.64483900  | -2.30420400 | -0.33574300 |
| C | 0.21944800  | -1.90875200 | 1.44373000  |
| C | 0.32803300  | -2.56907600 | 0.15903500  |
| C | 3.82704400  | -1.17820600 | 0.53162700  |
| H | 4.52264300  | -2.00441500 | 0.79001200  |
| H | 4.03864500  | -0.85288700 | -0.49658600 |
| H | 4.06312000  | -0.33355600 | 1.19448000  |
| C | 1.84116700  | -0.55035500 | 2.98277100  |
| H | 0.93903800  | -0.16532000 | 3.47502500  |
| H | 2.38884500  | -1.17702500 | 3.71004200  |
| H | 2.45893500  | 0.32769500  | 2.74895000  |
| C | -0.98845000 | -1.95180700 | 2.31983200  |
| H | -1.89980900 | -1.77400400 | 1.73236000  |
| H | -1.10203800 | -2.92013100 | 2.84128800  |
| H | -0.95044200 | -1.16151300 | 3.08141000  |
| C | -0.70808300 | -3.44811500 | -0.45593100 |
| H | -0.64376800 | -3.43153000 | -1.55180800 |
| H | -0.62333600 | -4.50512700 | -0.13359100 |
| H | -1.72062100 | -3.10935000 | -0.20255500 |
| C | 2.21913300  | -2.76903300 | -1.63643400 |
| H | 2.76430900  | -1.94214100 | -2.11475200 |
| H | 2.90800200  | -3.62316700 | -1.49835900 |
| H | 1.42488700  | -3.08874700 | -2.32386400 |
| C | 1.12082500  | 3.72034900  | 1.30798900  |
| C | 1.80057600  | 2.51459900  | 1.04258400  |
| H | 1.52774600  | 4.66430100  | 1.67563200  |
| H | 2.86799600  | 2.32192900  | 1.11476600  |
| N | -0.32270600 | 2.36030300  | 0.61290000  |



|    |             |             |             |
|----|-------------|-------------|-------------|
| C  | -1.35519900 | 0.40079900  | -0.18420300 |
| C  | -1.53162000 | 1.73960900  | 0.23632800  |
| C  | -2.54916800 | -0.25453400 | -0.53913500 |
| C  | -2.76600700 | 2.37850500  | 0.30105300  |
| C  | -3.82477600 | 0.33702700  | -0.47088100 |
| H  | -2.52387800 | -1.28628000 | -0.89702300 |
| C  | -3.91226800 | 1.66700000  | -0.05306400 |
| H  | -2.80847500 | 3.41694900  | 0.63569500  |
| H  | -4.90587900 | 2.11390200  | -0.01439300 |
| H  | 0.73356400  | 0.30353000  | -1.65561600 |
| C  | -5.10892100 | -0.43890100 | -0.83065300 |
| O  | -4.97067100 | -1.64787300 | -1.14378700 |
| O  | -6.18654300 | 0.21330000  | -0.77065300 |
| C  | 0.82965800  | 1.60984700  | 0.57672900  |
| N  | -0.18730600 | 3.64134400  | 1.05454700  |
| C  | 2.99599100  | 2.67119600  | -2.41148400 |
| H  | 2.75123900  | 2.72258400  | -3.48341400 |
| H  | 2.06328100  | 2.75420200  | -1.83874800 |
| H  | 3.63387100  | 3.53462400  | -2.15094300 |
| C  | 3.67562000  | 1.33468000  | -2.08853900 |
| H  | 3.93118600  | 1.37798100  | -0.99229100 |
| H  | 4.68360900  | 1.35188700  | -2.59806400 |
| O  | 2.94382900  | 0.25034500  | -2.43399400 |
| H  | 1.66443600  | 0.24248900  | -1.72608300 |
| Ru | 0.62013600  | -0.34557200 | -0.04238300 |

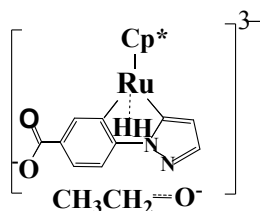

**Ru-26**

55

**E=-1284.5302805(au)**

|   |            |             |            |
|---|------------|-------------|------------|
| C | 0.99739100 | -0.17736800 | 1.82217300 |
| C | 2.17307000 | -0.32718400 | 0.99267200 |
| C | 1.97555800 | -1.49547300 | 0.19727800 |
| C | 0.12208300 | -1.28741200 | 1.57479400 |
| C | 0.71473600 | -2.09773300 | 0.55568400 |
| C | 3.41812400 | 0.50697600  | 1.07411800 |
| H | 3.61513000 | 0.79030000  | 2.12056200 |
| H | 4.30735200 | -0.03802100 | 0.70478200 |
| H | 3.33044300 | 1.44253900  | 0.50441600 |
| C | 0.79962100 | 0.90186100  | 2.83545000 |

|   |             |             |             |
|---|-------------|-------------|-------------|
| H | -0.26840700 | 1.08486700  | 3.01182800  |
| H | 1.27345600  | 0.66271700  | 3.80330600  |
| H | 1.22303000  | 1.84609700  | 2.47027600  |
| C | -1.15378300 | -1.58828300 | 2.28727600  |
| H | -1.92625800 | -1.95149900 | 1.59761800  |
| H | -1.00614500 | -2.34777200 | 3.07318700  |
| H | -1.56341900 | -0.68714800 | 2.75964700  |
| C | 0.17920800  | -3.39723800 | 0.05128500  |
| H | 0.51089200  | -3.58472400 | -0.97784500 |
| H | 0.50626200  | -4.25759400 | 0.66415900  |
| H | -0.91825900 | -3.39540000 | 0.04079800  |
| C | 2.97098700  | -2.08204300 | -0.76164700 |
| H | 3.99441900  | -1.69744900 | -0.59787600 |
| H | 3.00922900  | -3.17633700 | -0.64318400 |
| H | 2.69878000  | -1.88400300 | -1.80788800 |
| C | -0.10090800 | 4.25574600  | -0.00663100 |
| C | 0.82688300  | 3.19670600  | -0.08735300 |
| H | 0.09504500  | 5.32291200  | 0.10298600  |
| H | 1.91092800  | 3.25353500  | -0.05787800 |
| N | -1.22452300 | 2.49354500  | -0.21024700 |
| C | -1.80546500 | 0.22699100  | -0.41964800 |
| C | -2.26966600 | 1.55557600  | -0.32039200 |
| C | -2.81026300 | -0.74440900 | -0.54963100 |
| C | -3.61702000 | 1.90283600  | -0.33007400 |
| C | -4.18448500 | -0.44692300 | -0.55623600 |
| H | -2.54888200 | -1.80130000 | -0.65086100 |
| C | -4.56942400 | 0.89137000  | -0.44614100 |
| H | -3.89445000 | 2.95483400  | -0.24566400 |
| H | -5.63826300 | 1.10385700  | -0.45782500 |
| H | 0.00402200  | -0.29511500 | -1.92862600 |
| C | -5.25624300 | -1.55137700 | -0.67704500 |
| O | -4.83754400 | -2.73406000 | -0.71871000 |
| O | -6.45098900 | -1.15646600 | -0.71841300 |
| C | 0.06720900  | 2.02676700  | -0.22134700 |
| N | -1.36654000 | 3.83934600  | -0.08217700 |
| C | 5.91384900  | 0.11730100  | -2.22316200 |
| H | 5.90282800  | -0.82608600 | -2.79190300 |
| H | 4.86489700  | 0.39792000  | -2.04377000 |
| H | 6.38809300  | 0.90236900  | -2.84366500 |
| C | 6.62613700  | -0.11086500 | -0.86683100 |
| H | 6.64266700  | 0.93611900  | -0.39172000 |
| H | 7.73829400  | -0.24173000 | -1.15211100 |
| O | 6.10701000  | -1.07232800 | -0.13381100 |
| H | 0.67026600  | 0.31891600  | -1.89433000 |

Ru                    0.28550200    -0.02534400    -0.25685300

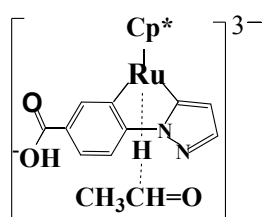

**Ru-27**

**53**

**E=-1283.3451705(au)**

|   |             |             |             |
|---|-------------|-------------|-------------|
| C | -2.13618000 | -0.73850700 | -1.64164600 |
| C | -2.76102000 | -1.13106800 | -0.41582700 |
| C | -1.86712800 | -2.07477000 | 0.23213000  |
| C | -0.87365200 | -1.45189600 | -1.76708500 |
| C | -0.74773300 | -2.32395300 | -0.61360300 |
| C | -4.04729300 | -0.64905300 | 0.17309500  |
| H | -4.87990500 | -1.36629800 | 0.03163000  |
| H | -3.91796500 | -0.47120700 | 1.25757500  |
| H | -4.35588200 | 0.30309900  | -0.28404400 |
| C | -2.70820500 | 0.17636400  | -2.67306100 |
| H | -1.91647900 | 0.76063900  | -3.15876400 |
| H | -3.26261500 | -0.37010700 | -3.45843700 |
| H | -3.39475300 | 0.90305000  | -2.21900600 |
| C | 0.03065300  | -1.44587400 | -2.95419900 |
| H | 1.07274100  | -1.59410800 | -2.64467100 |
| H | -0.21843900 | -2.23101900 | -3.69521600 |
| H | -0.00893300 | -0.47550900 | -3.46691300 |
| C | 0.32664500  | -3.33692500 | -0.40891400 |
| H | 0.46061800  | -3.56476400 | 0.65621300  |
| H | 0.10900600  | -4.28920200 | -0.92930300 |
| H | 1.29894900  | -2.97760700 | -0.76738700 |
| C | -2.13883800 | -2.66620300 | 1.57510900  |
| H | -2.40997700 | -1.86569000 | 2.29373500  |
| H | -2.97572200 | -3.38871500 | 1.53505000  |
| H | -1.25693800 | -3.19682400 | 1.95815700  |
| C | -0.71748800 | 4.08741800  | -0.85079300 |
| C | -1.55656600 | 2.96314900  | -0.72076100 |
| H | -0.99187800 | 5.12409400  | -1.05536300 |
| H | -2.64198900 | 2.93156800  | -0.77438400 |
| N | 0.53434800  | 2.44521100  | -0.45991400 |
| C | 1.29990900  | 0.27747100  | 0.07738800  |
| C | 1.65200500  | 1.61914600  | -0.20275800 |
| C | 2.40189000  | -0.56523300 | 0.31717900  |
| C | 2.96013000  | 2.09029300  | -0.24648500 |

|    |             |             |             |
|----|-------------|-------------|-------------|
| C  | 3.74493500  | -0.14690700 | 0.26379700  |
| H  | 2.24701200  | -1.61770500 | 0.56211900  |
| C  | 4.00519100  | 1.19589300  | -0.01601500 |
| H  | 3.13890700  | 3.14423800  | -0.46772200 |
| H  | 5.05027600  | 1.50448900  | -0.04919400 |
| C  | 4.91962700  | -1.12375400 | 0.48015100  |
| O  | 4.62490700  | -2.33178500 | 0.65854600  |
| O  | 6.07403200  | -0.61766700 | 0.44831300  |
| C  | -0.71400500 | 1.86953500  | -0.46294400 |
| N  | 0.57367100  | 3.78278500  | -0.69759700 |
| C  | -0.98139600 | 1.48031800  | 3.49921900  |
| H  | -1.48917400 | 2.04406500  | 4.30031900  |
| H  | -0.36034200 | 0.70531000  | 3.96943600  |
| H  | -0.32533000 | 2.15802400  | 2.93178500  |
| C  | -2.01622100 | 0.81795700  | 2.57423900  |
| H  | -1.29291100 | 0.36139000  | 1.73452200  |
| H  | -2.51461100 | 1.64399400  | 1.98598700  |
| O  | -2.82449300 | -0.05410000 | 3.12751900  |
| Ru | -0.78106600 | -0.16552700 | -0.07563400 |

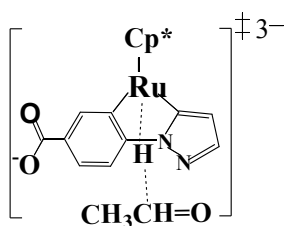

**Ru-TS<sub>27-28</sub>**

**53 -493.50i cm<sup>-1</sup>**

**E=-1283.3342732(au)**

|   |             |             |             |
|---|-------------|-------------|-------------|
| C | -2.02952000 | -1.08021100 | -1.58251000 |
| C | -2.74708400 | -1.20153600 | -0.33818500 |
| C | -1.93514100 | -2.02228300 | 0.52778800  |
| C | -0.82737100 | -1.87445300 | -1.50387100 |
| C | -0.78297700 | -2.47471600 | -0.18747200 |
| C | -4.05891400 | -0.58878500 | 0.02644700  |
| H | -4.92538000 | -1.27006800 | -0.10103700 |
| H | -4.04843300 | -0.25736100 | 1.07724000  |
| H | -4.25911300 | 0.30100900  | -0.59051600 |
| C | -2.51252300 | -0.33243400 | -2.78155600 |
| H | -1.67936400 | -0.10558700 | -3.45964300 |
| H | -3.27730500 | -0.88930500 | -3.35554400 |
| H | -2.94229100 | 0.63626000  | -2.49065100 |
| C | 0.17129900  | -2.11990200 | -2.58532100 |
| H | 1.19206800  | -2.08603000 | -2.18014000 |
| H | 0.04244800  | -3.09818300 | -3.08908800 |

|    |             |             |             |
|----|-------------|-------------|-------------|
| H  | 0.11603700  | -1.33856900 | -3.35555700 |
| C  | 0.22938900  | -3.46609400 | 0.27614000  |
| H  | 0.34096500  | -3.43925600 | 1.36792900  |
| H  | -0.02339000 | -4.50752600 | -0.00942900 |
| H  | 1.22250200  | -3.24528800 | -0.13465700 |
| C  | -2.31141400 | -2.39226300 | 1.92595500  |
| H  | -2.66572100 | -1.51088000 | 2.47908400  |
| H  | -3.10702300 | -3.16162000 | 1.95040100  |
| H  | -1.44463400 | -2.79227600 | 2.46840200  |
| C  | -0.84389200 | 3.91363800  | -1.20339100 |
| C  | -1.63477200 | 2.76478400  | -0.99988000 |
| H  | -1.16084200 | 4.91518800  | -1.50298700 |
| H  | -2.71608000 | 2.67876400  | -1.08958300 |
| N  | 0.47152100  | 2.37099200  | -0.64236100 |
| C  | 1.30429100  | 0.26986400  | 0.01718800  |
| C  | 1.61575000  | 1.60971000  | -0.32430000 |
| C  | 2.43658200  | -0.52312200 | 0.29933000  |
| C  | 2.90760500  | 2.12565800  | -0.37054800 |
| C  | 3.76357500  | -0.05820400 | 0.24605200  |
| H  | 2.31322700  | -1.56914800 | 0.59015900  |
| C  | 3.98089800  | 1.28250000  | -0.08493700 |
| H  | 3.05159100  | 3.17457100  | -0.63909300 |
| H  | 5.01407200  | 1.62907500  | -0.11335100 |
| C  | 4.97157400  | -0.97434200 | 0.53363800  |
| O  | 4.72410200  | -2.17843900 | 0.79506400  |
| O  | 6.10805600  | -0.42955000 | 0.47491000  |
| C  | -0.74970800 | 1.73367600  | -0.62238800 |
| N  | 0.45484000  | 3.68917100  | -0.99022000 |
| C  | -1.07391300 | 2.32517800  | 2.80016900  |
| H  | -1.58699700 | 3.16660700  | 3.30106600  |
| H  | -0.41811500 | 1.84204500  | 3.53311100  |
| H  | -0.47053600 | 2.70915900  | 1.97020200  |
| C  | -2.12181500 | 1.34486000  | 2.31014200  |
| H  | -0.79122000 | 0.39172100  | 1.55939000  |
| H  | -2.53302400 | 1.59462500  | 1.31247700  |
| O  | -2.77557000 | 0.64846200  | 3.10963900  |
| Ru | -0.74300400 | -0.22913600 | -0.03131700 |

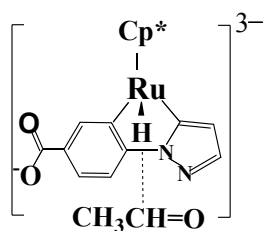

**Ru-28**

**E=-1283.3382727(au)**

|   |             |             |             |
|---|-------------|-------------|-------------|
| C | 1.74508700  | -1.23392000 | 1.67596900  |
| C | 2.59710800  | -1.33407500 | 0.51449400  |
| C | 1.86683100  | -2.08360700 | -0.47222400 |
| C | 0.53471900  | -1.96238400 | 1.42007500  |
| C | 0.61697200  | -2.51348500 | 0.08539000  |
| C | 4.00123600  | -0.84108700 | 0.39859500  |
| H | 4.75897100  | -1.57653900 | 0.73985600  |
| H | 4.24629900  | -0.57553400 | -0.64069000 |
| H | 4.15090900  | 0.06602400  | 1.00567100  |
| C | 2.11274700  | -0.52613500 | 2.93865000  |
| H | 1.22965000  | -0.38251700 | 3.57509900  |
| H | 2.87286100  | -1.06979700 | 3.53273000  |
| H | 2.50434900  | 0.47992600  | 2.72564100  |
| C | -0.61163800 | -2.17362300 | 2.35262400  |
| H | -1.56676700 | -2.01941800 | 1.83064500  |
| H | -0.62834900 | -3.18693400 | 2.79695200  |
| H | -0.58616500 | -1.44654100 | 3.17560200  |
| C | -0.35575600 | -3.46526200 | -0.52391700 |
| H | -0.37296600 | -3.37055200 | -1.61770500 |
| H | -0.13475500 | -4.52670600 | -0.28515700 |
| H | -1.37945500 | -3.26164500 | -0.18482500 |
| C | 2.38996800  | -2.45232200 | -1.82341900 |
| H | 2.98712800  | -1.63482700 | -2.24638100 |
| H | 3.01837700  | -3.36356600 | -1.80013900 |
| H | 1.56131900  | -2.63655200 | -2.51947600 |
| C | 0.92960800  | 3.84370600  | 1.24521500  |
| C | 1.67492700  | 2.66772200  | 1.02496300  |
| H | 1.28075400  | 4.81641600  | 1.59788700  |
| H | 2.74548200  | 2.52946700  | 1.16658600  |
| N | -0.43030800 | 2.39161900  | 0.56081400  |
| C | -1.34785900 | 0.32596500  | -0.09251600 |
| C | -1.60272500 | 1.68239800  | 0.23218100  |
| C | -2.50877900 | -0.41863100 | -0.38869800 |
| C | -2.87170600 | 2.25343000  | 0.25612400  |
| C | -3.81463800 | 0.10511100  | -0.36032900 |
| H | -2.42509500 | -1.46992500 | -0.67535800 |
| C | -3.97739000 | 1.45635800  | -0.03983100 |
| H | -2.97404800 | 3.30901700  | 0.51794500  |
| H | -4.99414700 | 1.84951700  | -0.02803000 |
| C | -5.05630100 | -0.75770500 | -0.66936900 |
| O | -4.85783900 | -1.97213600 | -0.92530400 |
| O | -6.16874600 | -0.16337100 | -0.63421500 |

|    |             |             |             |
|----|-------------|-------------|-------------|
| C  | 0.76043400  | 1.69381600  | 0.56299900  |
| N  | -0.36712700 | 3.69236600  | 0.96924100  |
| C  | 1.90986800  | 2.40855000  | -2.57876400 |
| H  | 2.49699800  | 3.31042700  | -2.82602900 |
| H  | 1.45324400  | 2.03661600  | -3.50289500 |
| H  | 1.13260200  | 2.66573100  | -1.85285500 |
| C  | 2.84689500  | 1.37255300  | -2.01380500 |
| H  | 0.59429300  | 0.27675900  | -1.59073500 |
| H  | 2.89444000  | 1.32937600  | -0.91032900 |
| O  | 3.59774700  | 0.70830000  | -2.72631500 |
| Ru | 0.66157200  | -0.26369800 | -0.01986800 |

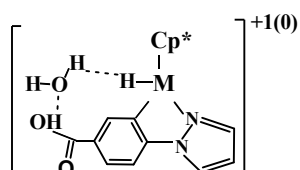

H<sub>2</sub>O-1

M=Ir, Ru

51

E<sub>Ir</sub> = -1216.3248575 (au)

|    |             |             |             |
|----|-------------|-------------|-------------|
| C  | 2.43154700  | -0.56360100 | 1.31167100  |
| C  | 2.89981700  | -0.90359300 | -0.02227200 |
| C  | 2.02178800  | -1.89617400 | -0.54375200 |
| C  | 1.28704100  | -1.34597400 | 1.60549600  |
| C  | 0.98374200  | -2.14516900 | 0.43017900  |
| Ir | 0.79312400  | -0.06322500 | -0.22948600 |
| C  | 4.15329500  | -0.39733700 | -0.65319700 |
| H  | 5.02264500  | -1.00921600 | -0.37404700 |
| H  | 4.08228800  | -0.40129300 | -1.74625300 |
| H  | 4.37300100  | 0.63023400  | -0.34018800 |
| C  | 3.08743900  | 0.44339500  | 2.19363900  |
| H  | 2.47770100  | 0.66612900  | 3.07452200  |
| H  | 4.06604200  | 0.08860600  | 2.54310500  |
| H  | 3.25313300  | 1.38987100  | 1.66254200  |
| C  | 0.49404200  | -1.35469100 | 2.86679300  |
| H  | -0.58183400 | -1.39033700 | 2.65931200  |
| H  | 0.74038600  | -2.22744400 | 3.48602000  |
| H  | 0.67713000  | -0.45612700 | 3.46460300  |
| C  | -0.02872700 | -3.23949500 | 0.36162800  |
| H  | -0.47017700 | -3.32985900 | -0.63702700 |
| H  | 0.42017500  | -4.20773300 | 0.62330900  |
| H  | -0.84964700 | -3.06583900 | 1.06669800  |
| C  | 2.15519300  | -2.60760000 | -1.84725500 |
| H  | 2.63278300  | -1.97657200 | -2.60385400 |

|   |             |             |             |
|---|-------------|-------------|-------------|
| H | 2.76128700  | -3.51640200 | -1.73298600 |
| H | 1.17497000  | -2.90730000 | -2.23344800 |
| C | -0.08953200 | 4.02763200  | -0.30811000 |
| C | 1.24748600  | 4.23365300  | -0.57590600 |
| C | 1.81673900  | 2.95294900  | -0.60831200 |
| N | 0.88610400  | 2.02966400  | -0.36924600 |
| H | -0.91007600 | 4.72270300  | -0.19905200 |
| H | 1.74345100  | 5.18072500  | -0.73004800 |
| H | 2.83750400  | 2.64996200  | -0.80576100 |
| N | -0.27907700 | 2.69190800  | -0.18589600 |
| C | -1.14068700 | 0.51201200  | 0.11204500  |
| C | -1.41805700 | 1.88863900  | 0.05829300  |
| C | -2.25378000 | -0.30968800 | 0.28426400  |
| C | -2.69281400 | 2.43255900  | 0.18927800  |
| C | -3.55438700 | 0.19207000  | 0.31800800  |
| H | -2.11111900 | -1.38820600 | 0.33971500  |
| C | -3.77336500 | 1.57064800  | 0.31475300  |
| H | -2.84997400 | 3.50938900  | 0.15888600  |
| H | -4.79214800 | 1.94347800  | 0.37901100  |
| C | -4.72590600 | -0.72913100 | 0.27612000  |
| O | -5.79727900 | -0.46613900 | 0.76648600  |
| O | -4.52430100 | -1.88479300 | -0.38016600 |
| H | 0.29250900  | 0.01640900  | -1.76311300 |
| H | -3.69294900 | -1.87875300 | -0.89749000 |
| O | -2.09406800 | -1.98010900 | -2.08257400 |
| H | -2.25665200 | -1.83593300 | -3.01912600 |
| H | -1.44023800 | -1.30744900 | -1.82909400 |

**E<sub>Ru</sub> = -1206.9469004(au)**

|   |             |             |             |
|---|-------------|-------------|-------------|
| C | 2.57587800  | -0.49888000 | 1.16264000  |
| C | 2.99006200  | -0.87896800 | -0.17196100 |
| C | 2.09003700  | -1.89421200 | -0.61783000 |
| C | 1.46110800  | -1.30677800 | 1.54103500  |
| C | 1.13849200  | -2.17146700 | 0.42851900  |
| C | 4.19790700  | -0.36931900 | -0.88488600 |
| H | 5.10816300  | -0.94427600 | -0.64393300 |
| H | 4.06363000  | -0.40480200 | -1.97296600 |
| H | 4.40619500  | 0.67655800  | -0.61933300 |
| C | 3.25406000  | 0.54072000  | 1.99054400  |
| H | 2.64045800  | 0.82335500  | 2.85390200  |
| H | 4.23060800  | 0.20060700  | 2.36890500  |
| H | 3.43017600  | 1.45795900  | 1.40966600  |
| C | 0.74385800  | -1.30164000 | 2.84923800  |
| H | -0.33869600 | -1.40559100 | 2.70158700  |
| H | 1.06994000  | -2.12159600 | 3.50833600  |



|    |             |             |             |
|----|-------------|-------------|-------------|
| H  | 0.89981700  | -0.35726300 | 3.38427200  |
| C  | 0.16745600  | -3.30470800 | 0.46869800  |
| H  | -0.22929400 | -3.54380800 | -0.52500400 |
| H  | 0.62437400  | -4.22305200 | 0.87270600  |
| H  | -0.69289200 | -3.06885000 | 1.10899000  |
| C  | 2.15931600  | -2.62239500 | -1.92017200 |
| H  | 2.58907200  | -1.98947100 | -2.70546900 |
| H  | 2.77331900  | -3.53332800 | -1.84379600 |
| H  | 1.15898100  | -2.91788100 | -2.25778700 |
| C  | -0.02536500 | 4.00983800  | -0.31482000 |
| C  | 1.31293600  | 4.21809500  | -0.57488200 |
| C  | 1.88655800  | 2.93555500  | -0.60227800 |
| N  | 0.96081000  | 1.99954600  | -0.36957400 |
| H  | -0.85221900 | 4.69801800  | -0.20468400 |
| H  | 1.80722800  | 5.16793600  | -0.72671800 |
| H  | 2.90778000  | 2.63175300  | -0.79811700 |
| N  | -0.20621300 | 2.66731900  | -0.19273400 |
| C  | -1.03013600 | 0.48679700  | 0.17815000  |
| C  | -1.33594300 | 1.86376700  | 0.06692500  |
| C  | -2.16362200 | -0.31661700 | 0.37586600  |
| C  | -2.62007500 | 2.40413700  | 0.12621500  |
| C  | -3.46868100 | 0.16744600  | 0.31996500  |
| H  | -2.02066600 | -1.39113900 | 0.49643600  |
| C  | -3.70551700 | 1.54587800  | 0.23909700  |
| H  | -2.77979600 | 3.47877300  | 0.02955800  |
| H  | -4.72944700 | 1.91139700  | 0.22127800  |
| C  | -4.60626100 | -0.77669800 | 0.19446000  |
| O  | -5.73687600 | -0.55294300 | 0.57037600  |
| O  | -4.31482700 | -1.93448100 | -0.43310900 |
| H  | 0.31918700  | -0.05220500 | -1.79586100 |
| Ru | 0.88536200  | -0.08957200 | -0.22726700 |
| H  | -3.42515200 | -1.90578100 | -0.84831800 |
| O  | -1.74799700 | -1.94702200 | -2.00379200 |
| H  | -1.93293600 | -1.33218700 | -2.72095900 |
| H  | -1.00073200 | -1.48975300 | -1.55173400 |

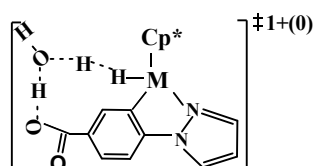

**H<sub>2</sub>O-TS<sub>1-2</sub>**

**M=Ir, Ru**

**51 -1210.96i cm<sup>-1</sup>**

**E<sub>Ir</sub> =-1216.282663(au)**

|    |             |             |             |
|----|-------------|-------------|-------------|
| C  | 2.27581100  | -0.42960600 | 1.29041500  |
| C  | 2.87957200  | -0.77788400 | 0.00507200  |
| C  | 2.12694900  | -1.83844300 | -0.54575700 |
| C  | 1.21430600  | -1.36308500 | 1.55311200  |
| C  | 1.06020000  | -2.18840700 | 0.38618200  |
| Ir | 0.70818200  | -0.10462800 | -0.19912700 |
| C  | 4.08816700  | -0.13124300 | -0.58034200 |
| H  | 5.00407000  | -0.64865400 | -0.26554400 |
| H  | 4.06227800  | -0.13930600 | -1.67540800 |
| H  | 4.18350600  | 0.91104200  | -0.25447100 |
| C  | 2.79905100  | 0.60902900  | 2.22210800  |
| H  | 2.06275600  | 0.85799100  | 2.99223900  |
| H  | 3.71184800  | 0.26485300  | 2.72546300  |
| H  | 3.04083900  | 1.53686100  | 1.69068200  |
| C  | 0.39383300  | -1.44316900 | 2.79183400  |
| H  | -0.64933600 | -1.69007200 | 2.57009500  |
| H  | 0.78898800  | -2.21797600 | 3.46088700  |
| H  | 0.39211100  | -0.49271200 | 3.33343500  |
| C  | 0.12357200  | -3.33785900 | 0.21547600  |
| H  | -0.43824100 | -3.26464900 | -0.72296000 |
| H  | 0.67298600  | -4.28847500 | 0.22528700  |
| H  | -0.61209600 | -3.37441500 | 1.02491400  |
| C  | 2.34336100  | -2.52733100 | -1.84824800 |
| H  | 2.92212600  | -1.91355900 | -2.54547100 |
| H  | 2.88634000  | -3.46964100 | -1.69712500 |
| H  | 1.38741400  | -2.77413000 | -2.32321000 |
| C  | -0.08284500 | 4.01517000  | -0.25104100 |
| C  | 1.20796500  | 4.18397700  | -0.72125300 |
| C  | 1.72449700  | 2.89033900  | -0.83900200 |
| N  | 0.80691500  | 1.99538900  | -0.46297000 |
| H  | -0.85655300 | 4.73141900  | -0.01171100 |
| H  | 1.70386900  | 5.11625700  | -0.94803600 |
| H  | 2.69489000  | 2.55302100  | -1.18245800 |
| N  | -0.29486900 | 2.69194900  | -0.10337100 |
| C  | -1.12834000 | 0.55506800  | 0.43388300  |
| C  | -1.41818400 | 1.91221100  | 0.27869300  |
| C  | -2.19589300 | -0.31006000 | 0.59168600  |
| C  | -2.72072700 | 2.40943400  | 0.31600900  |
| C  | -3.50680900 | 0.12571800  | 0.43718400  |
| H  | -2.02571000 | -1.38450900 | 0.63113500  |
| C  | -3.76884100 | 1.49655100  | 0.38487500  |
| H  | -2.91968100 | 3.47414300  | 0.19966500  |
| H  | -4.80438800 | 1.82147200  | 0.30981500  |
| C  | -4.54770100 | -0.90874000 | 0.02953500  |

|   |             |             |             |
|---|-------------|-------------|-------------|
| O | -5.72206500 | -0.73234300 | 0.33502500  |
| O | -4.03808500 | -1.85388800 | -0.67485800 |
| H | -0.02862800 | -0.10193900 | -1.79186200 |
| H | -2.78904000 | -1.70640900 | -1.32227300 |
| O | -1.85589700 | -1.65173200 | -1.86936400 |
| H | -2.10769900 | -1.61213700 | -2.79656900 |
| H | -0.67625000 | -0.68981400 | -1.55830700 |

**-736.41i cm<sup>-1</sup>**

**E<sub>Ru</sub> = -1206.918334(au)**

|   |             |             |             |
|---|-------------|-------------|-------------|
| C | 2.63802300  | -0.43904900 | 0.97374200  |
| C | 2.89947000  | -1.00107800 | -0.33670400 |
| C | 1.91260800  | -2.00908500 | -0.55461600 |
| C | 1.55106200  | -1.15859600 | 1.57591600  |
| C | 1.08209700  | -2.13179300 | 0.62044100  |
| C | 4.03791600  | -0.64246200 | -1.23099800 |
| H | 4.95403800  | -1.20787800 | -0.99291100 |
| H | 3.79653600  | -0.83515500 | -2.28327000 |
| H | 4.29165700  | 0.42249200  | -1.14940700 |
| C | 3.43340700  | 0.65294100  | 1.60617100  |
| H | 2.85768600  | 1.15629500  | 2.39175500  |
| H | 4.36712000  | 0.28064300  | 2.05423100  |
| H | 3.70469200  | 1.42096800  | 0.86927000  |
| C | 1.01141700  | -0.96869000 | 2.95359000  |
| H | -0.07809200 | -1.09039000 | 2.96969000  |
| H | 1.44283500  | -1.68944000 | 3.66453300  |
| H | 1.22346500  | 0.04006800  | 3.32710800  |
| C | 0.02975900  | -3.17025200 | 0.82645000  |
| H | -0.61623900 | -3.25560800 | -0.05661900 |
| H | 0.46585500  | -4.15992900 | 1.03484900  |
| H | -0.61961700 | -2.91495300 | 1.67265500  |
| C | 1.75204600  | -2.85583400 | -1.77418400 |
| H | 2.20108900  | -2.38015600 | -2.65425100 |
| H | 2.22328500  | -3.84155600 | -1.64359600 |
| H | 0.68882900  | -3.01475600 | -1.99013600 |
| C | 0.02721400  | 4.01149300  | -0.25560900 |
| C | 1.31534200  | 4.18927500  | -0.72437500 |
| C | 1.83651100  | 2.89230700  | -0.84501700 |
| N | 0.93174500  | 1.98234100  | -0.47274300 |
| H | -0.75419600 | 4.71769600  | -0.00966200 |
| H | 1.80771800  | 5.12610900  | -0.94548400 |
| H | 2.80999200  | 2.56552400  | -1.19136500 |
| N | -0.17025900 | 2.68015300  | -0.11435100 |
| C | -0.99912500 | 0.54521200  | 0.45134800  |
| C | -1.29568500 | 1.90224700  | 0.26780200  |

|    |             |             |             |
|----|-------------|-------------|-------------|
| C  | -2.10918500 | -0.28468500 | 0.60650400  |
| C  | -2.59045000 | 2.42557400  | 0.25430600  |
| C  | -3.40852100 | 0.16385200  | 0.40452500  |
| H  | -1.95264800 | -1.35832900 | 0.69179100  |
| C  | -3.65852200 | 1.53753700  | 0.30781200  |
| H  | -2.76457700 | 3.49210600  | 0.10318000  |
| H  | -4.68574700 | 1.87837200  | 0.19472400  |
| C  | -4.46238900 | -0.84069000 | 0.02470500  |
| O  | -5.64133900 | -0.67410300 | 0.31596900  |
| O  | -4.00024700 | -1.83882000 | -0.67612600 |
| H  | -0.05800200 | -0.23489200 | -1.74442600 |
| Ru | 0.83170000  | -0.14012100 | -0.20433200 |
| H  | -2.92053800 | -1.74950600 | -1.15014700 |
| O  | -1.80870700 | -1.75803800 | -1.73298300 |
| H  | -1.99352600 | -1.72339900 | -2.67599600 |
| H  | -0.73244700 | -0.85815100 | -1.55199600 |

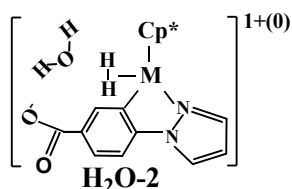

**M=Ir, Ru**

**51**

**E<sub>Ir</sub> = -1216.3011679(au)**

|    |             |             |             |
|----|-------------|-------------|-------------|
| C  | 2.22307000  | -0.41961600 | 1.34101200  |
| C  | 2.87644500  | -0.86652800 | 0.11303900  |
| C  | 2.09333800  | -1.92072200 | -0.41489300 |
| C  | 1.11075400  | -1.29036000 | 1.60715800  |
| C  | 0.97224400  | -2.17291200 | 0.48242600  |
| Ir | 0.75235000  | -0.10805600 | -0.25425300 |
| C  | 4.15731800  | -0.33733100 | -0.43592100 |
| H  | 5.01222200  | -0.92574100 | -0.07744400 |
| H  | 4.17203600  | -0.36551200 | -1.53076700 |
| H  | 4.33066100  | 0.69820500  | -0.12460900 |
| C  | 2.73111000  | 0.66022500  | 2.23291700  |
| H  | 1.93858500  | 1.04537400  | 2.88194600  |
| H  | 3.54444600  | 0.29342900  | 2.87186600  |
| H  | 3.11701800  | 1.50624000  | 1.65296700  |
| C  | 0.22922000  | -1.26346100 | 2.80502600  |
| H  | -0.82050900 | -1.42202700 | 2.53740200  |
| H  | 0.52365100  | -2.05384700 | 3.50701500  |
| H  | 0.29062500  | -0.30482200 | 3.32826100  |
| C  | -0.01448400 | -3.28413400 | 0.33264300  |
| H  | -0.61400100 | -3.17858800 | -0.58152900 |

|   |             |             |             |
|---|-------------|-------------|-------------|
| H | 0.50087500  | -4.25297500 | 0.30934400  |
| H | -0.71352800 | -3.30556700 | 1.17417300  |
| C | 2.33184000  | -2.68724400 | -1.66905500 |
| H | 2.95959800  | -2.13263400 | -2.37342100 |
| H | 2.83279100  | -3.63815100 | -1.44558200 |
| H | 1.38419200  | -2.92491300 | -2.16523000 |
| C | -0.00262300 | 4.01855700  | -0.29620600 |
| C | 1.30744600  | 4.18360400  | -0.71303600 |
| C | 1.82204100  | 2.88979400  | -0.81802100 |
| N | 0.88490200  | 1.99623700  | -0.48338600 |
| H | -0.78361300 | 4.73648300  | -0.08740400 |
| H | 1.81623700  | 5.11467600  | -0.91458600 |
| H | 2.80422600  | 2.55432500  | -1.12695800 |
| N | -0.22792200 | 2.69670500  | -0.16483300 |
| C | -1.12126900 | 0.55966100  | 0.27418400  |
| C | -1.37282100 | 1.92810500  | 0.17092200  |
| C | -2.20314100 | -0.28644900 | 0.42535900  |
| C | -2.65995400 | 2.45724300  | 0.26157300  |
| C | -3.50800600 | 0.19178400  | 0.37495300  |
| H | -2.07273000 | -1.36616200 | 0.43036900  |
| C | -3.72757100 | 1.57093200  | 0.36208000  |
| H | -2.83117700 | 3.53087200  | 0.18916700  |
| H | -4.75840100 | 1.91885600  | 0.36523600  |
| C | -4.63419200 | -0.81640100 | 0.10750300  |
| O | -5.77600700 | -0.47524900 | 0.42444500  |
| O | -4.22176400 | -1.86931000 | -0.46691700 |
| H | 0.23475000  | -0.05721900 | -1.93790100 |
| H | -2.78804000 | -1.87676100 | -1.42113800 |
| O | -1.95572100 | -1.91571600 | -1.97971500 |
| H | -2.27343300 | -2.16148700 | -2.85172900 |
| H | -0.37291700 | -0.56861300 | -1.57897000 |

**E<sub>Ru</sub> = -1206.9713186(au)**

|   |            |             |             |
|---|------------|-------------|-------------|
| C | 2.75941000 | -0.80551700 | 0.71140600  |
| C | 2.51927200 | -1.83235100 | -0.23690200 |
| C | 1.18288000 | -2.34875200 | -0.01831100 |
| C | 1.56419700 | -0.66696100 | 1.52932700  |
| C | 0.62546900 | -1.67039500 | 1.10746800  |
| C | 3.47304900 | -2.35260400 | -1.26069800 |
| H | 3.98077800 | -3.26466800 | -0.91278500 |
| H | 2.95339100 | -2.60580700 | -2.19227100 |
| H | 4.24389300 | -1.61326300 | -1.50791900 |
| C | 4.02418100 | -0.03915900 | 0.90548700  |
| H | 3.82143000 | 1.01065100  | 1.15122600  |
| H | 4.62633900 | -0.45493800 | 1.72685500  |

|    |             |             |             |
|----|-------------|-------------|-------------|
| H  | 4.64286900  | -0.05305900 | -0.00063700 |
| C  | 1.39834200  | 0.25783800  | 2.68882900  |
| H  | 0.34044600  | 0.50606600  | 2.83399800  |
| H  | 1.77564400  | -0.17456000 | 3.62782500  |
| H  | 1.93085700  | 1.20272900  | 2.51930200  |
| C  | -0.66769900 | -1.98877700 | 1.77661800  |
| H  | -1.35782500 | -2.52339600 | 1.11315700  |
| H  | -0.48150200 | -2.62344200 | 2.65539100  |
| H  | -1.18059100 | -1.08371200 | 2.11960400  |
| C  | 0.56935500  | -3.49854000 | -0.74665200 |
| H  | 0.82726700  | -3.47292000 | -1.81308100 |
| H  | 0.92765300  | -4.45956300 | -0.34739200 |
| H  | -0.52438900 | -3.48664300 | -0.66015600 |
| C  | 0.65399000  | 3.98264700  | -0.18018700 |
| C  | 2.01876100  | 4.04550400  | -0.40204000 |
| C  | 2.41070500  | 2.71723300  | -0.60861100 |
| N  | 1.35771100  | 1.89976900  | -0.51494400 |
| H  | -0.07601900 | 4.75572100  | 0.01500600  |
| H  | 2.63828000  | 4.93118100  | -0.41666500 |
| H  | 3.38716000  | 2.30053800  | -0.82269500 |
| N  | 0.28994000  | 2.68349300  | -0.25412300 |
| C  | -0.90133800 | 0.63322500  | -0.34170300 |
| C  | -0.96408200 | 2.02144100  | -0.15897400 |
| C  | -2.13368900 | -0.03021900 | -0.30312800 |
| C  | -2.14601000 | 2.72457500  | 0.07800800  |
| C  | -3.33976800 | 0.62510100  | -0.05307500 |
| H  | -2.16990500 | -1.10734200 | -0.45572400 |
| C  | -3.33316600 | 2.01169600  | 0.13568800  |
| H  | -2.13973900 | 3.80717100  | 0.21590100  |
| H  | -4.29181400 | 2.49133800  | 0.31972200  |
| C  | -4.67418700 | -0.13837200 | 0.02875600  |
| O  | -5.68733900 | 0.56476800  | 0.18270300  |
| O  | -4.60705500 | -1.39489500 | -0.06246300 |
| H  | 1.19581800  | -0.07992500 | -2.24449000 |
| Ru | 1.00800200  | -0.18793500 | -0.50878500 |
| H  | -3.50008500 | -2.66064800 | -0.22337600 |
| O  | -2.86440800 | -3.36360700 | -0.52708600 |
| H  | -2.79052000 | -3.14683900 | -1.46011700 |
| H  | 0.36731200  | -0.34415500 | -2.12372300 |
